# Supplementary material for: Regime shift in secondary inorganic aerosol formation and nitrogen deposition in the rural United States
Source: PubMed Central journal article supplement (PMC11245397; doi:10.1038/s41561-024-01455-9), 2024-06-20
Supplement: 41561_2024_1455_MOESM1_ESM.pdf [file 41561_2024_1455_MOESM1_ESM.pdf]

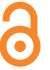

---

# Regime shift in secondary inorganic aerosol formation and nitrogen deposition in the rural United States

---

In the format provided by the authors and unedited

---

## TABLE OF CONTENTS

This file includes:

### Supplementary Texts

Supplementary Text 1. Relationships between emissions and observed concentrations.

Supplementary Text 2. Reactive nitrogen deposition trends.

Supplementary Text 3. The chemical regime of SIA formation and inorganic N<sub>r</sub> deposition.

### Supplementary Figures

Supplementary Figure 1. Intercomparison of weekly integrated  $c_{\text{SO}_4^{2-}}$ ,  $c_{\text{NO}_3^{\text{T}}}$ , and  $c_{\text{NH}_4^{\text{T}}}$  observations from CASTNET, IMPROVE, and EPA CSN networks.

Supplementary Figure 2. Mean annual, summer, and winter PM<sub>2.5</sub> composition observed at IMPROVE and CSN sites with collocated observations.

Supplementary Figure 3. Relationships between emissions and regional mean concentrations observed at long-term sites.

Supplementary Figure 4. SO<sub>2</sub> emission and  $c_{\text{SO}_4^{2-}}$  trends.

Supplementary Figure 5. NO<sub>x</sub> emission and  $c_{\text{NO}_3^{\text{T}}}$  trends.

Supplementary Figure 6. NH<sub>3</sub> emission and  $c_{\text{NH}_4^{\text{T}}}$  trends.

Supplementary Figure 7. Trend analysis of total reactive nitrogen deposition.

Supplementary Figure 8. Same as Supplementary Fig. 7 but regions are defined using satellite NH<sub>3</sub> hotspots.

Supplementary Figure 9. Regional means of annual, summer, and winter  $c_{\text{SIA}}$  changes ( $\Delta c_{\text{SIA}}$ ) due to 10% precursor reductions levels from 2011 to 2020.

Supplementary Figure 10. Regional means of annual, summer, and winter  $c_{\text{SIA}}$  changes ( $\Delta c_{\text{SIA}}$ ) due to 40% precursor reductions levels from 2011 to 2020.

Supplementary Figure 11. Regional means of annual, summer, and winter  $c_{\text{SIA}}$  changes ( $\Delta c_{\text{SIA}}$ ) due to 70% precursor reductions levels from 2011 to 2020.

Supplementary Figure 12. Intercomparison of biweekly averaged T and RH observations from CASTNET, ISD, and NARR datasets.

Supplementary Figure 13. T, RH,  $\epsilon_{\text{NH}_4^+}$  and  $\epsilon_{\text{NO}_3^-}$ , and aerosol composition from sites within the Western US (WRAP).

Supplementary Figure 14. Same as Supplementary Fig. 13 but for the Central US (CENSARA).

Supplementary Figure 16. Same as Supplementary Fig. 13 but for the Northeastern US (MANE-VU).

Supplementary Figure 17. Same as Supplementary Fig. 13 but for the Southeastern US (SESARM).

Supplementary Figure 18. Observed and ISORROPIA-II (Case 3) simulated (a)  $c_{\text{NH}_3}$ , (b)  $c_{\text{NH}_4^+}$ , (c)  $c_{\text{HNO}_3}$  (d)  $c_{\text{NO}_3^-}$ , (e)  $\varepsilon_{\text{NO}_3^-}$ , and (f)  $\varepsilon_{\text{NH}_4^+}$ .

Supplementary Figure 19. Same as Supplementary Fig. 18 but for Case 4.

Supplementary Figure 20. Ratios of CASTNET and IMPROVE/EPA CSN NVC and  $\text{Cl}^-$  observations (circles) and interpolated values for sites without IMPROVE/EPA CSN sites (crosses).

Supplementary Figure 21. Same as Supplementary Fig. 18 but for Case 5.

Supplementary Figure 22. Same as Supplementary Fig. 18 but for Case 6.

Supplementary Figure 23. Same as Supplementary Fig. 18 but for Case 7.

Supplementary Figure 24. Same as Supplementary Fig. 18 but for Case 8.

Supplementary Figure 25. Same as Supplementary Fig. 18 but for Case 9.

Supplementary Figure 26. Simulated  $\Delta c_{\text{SIA}}/\Delta c_{\text{SO}_4^{2-}}$ ,  $\Delta c_{\text{SIA}}/\Delta c_{\text{NO}_3^-}$ , and  $\Delta c_{\text{SIA}}/\Delta c_{\text{NH}_4^+}$  from sites within the Western US (WRAP).

Supplementary Figure 27. Same as Supplementary Fig. 26 but for the Central US (CENSARA).

Supplementary Figure 28. Same as Supplementary Fig. 26 but for the Midwestern (LADCO).

Supplementary Figure 29. Same as Supplementary Fig. 26 but for the Northeastern US (MANE-VU).

Supplementary Figure 30. Same as Supplementary Fig. 26 but for the Southeastern US (SESARM).

Supplementary Figure 31. ISORROPIA-II Simulated aerosol acidity related properties from sites within the Western US (WRAP).

Supplementary Figure 32. Same as Supplementary Fig. 31 but for the Central US (CENSARA).

Supplementary Figure 33. Same as Supplementary Fig. 31 but for the Midwestern US (LADCO).

Supplementary Figure 34. Same as Supplementary Fig. 31 but for the Northeastern US (MANE-VU).

Supplementary Figure 35. Same as Supplementary Fig. 31 but for the Southeastern US (SESARM).

## Supplementary Tables

Supplementary Table 1. Observations available at each site.

Supplementary Table 2. Region definition, information, and sites within each region.

Supplementary Table 3. Case studies of pre-processing of integrated observations for ISORROPIA simulations.

Supplementary Table 4. Region trends derived from Theil-Sen regressions and Mann-Kendall tests.

Supplementary Table 5. Literature review of studies that compared effectiveness of SO<sub>2</sub>, NO<sub>x</sub>, and NH<sub>3</sub> emission abatements on PM<sub>2.5</sub> reduction.

Supplementary Table 6. Annual and December NH<sub>3</sub> emissions in 2017 in different regions from all sources and agricultural sources.

Supplementary Table 7. Potential biases, precisions, and detection limits of observations from different monitoring networks.

Supplementary Table 8. Intercomparison of data from CASTNET, IMPROVE, CSN, ISD, and NARR at different spatial windows.

Supplementary Table 9. Observed and simulated annual  $\epsilon_{\text{NH}_4^+}$ .

Supplementary Table 10. Observed and simulated annual  $\epsilon_{\text{NO}_3^-}$ .

Supplementary Table 11. Simulated annual pH and aerosol water content (AWC).

Supplementary Table 12. Simulated annual  $\Delta c_{\text{SIA}}/\Delta c_{\text{SO}_4^{2-}}$ ,  $\Delta c_{\text{SIA}}/\Delta c_{\text{NO}_3^T}$ , and  $\Delta c_{\text{SIA}}/\Delta c_{\text{NH}_4^T}$  with 10% reductions.

Supplementary Table 13. Simulated annual  $\Delta c_{\text{SIA}}/\Delta c_{\text{SO}_4^{2-}}$ ,  $\Delta c_{\text{SIA}}/\Delta c_{\text{NO}_3^T}$ , and  $\Delta c_{\text{SIA}}/\Delta c_{\text{NH}_4^T}$  with 40% reductions.

Supplementary Table 14. Simulated annual  $\Delta c_{\text{SIA}}/\Delta c_{\text{SO}_4^{2-}}$ ,  $\Delta c_{\text{SIA}}/\Delta c_{\text{NO}_3^T}$ , and  $\Delta c_{\text{SIA}}/\Delta c_{\text{NH}_4^T}$  with 70% reductions.

Supplementary Table 15. Simulated summer  $\Delta c_{\text{SIA}}/\Delta c_{\text{SO}_4^{2-}}$ ,  $\Delta c_{\text{SIA}}/\Delta c_{\text{NO}_3^T}$ , and  $\Delta c_{\text{SIA}}/\Delta c_{\text{NH}_4^T}$  with 10% reductions.

Supplementary Table 16. Simulated summer  $\Delta c_{\text{SIA}}/\Delta c_{\text{SO}_4^{2-}}$ ,  $\Delta c_{\text{SIA}}/\Delta c_{\text{NO}_3^T}$ , and  $\Delta c_{\text{SIA}}/\Delta c_{\text{NH}_4^T}$  with 40% reductions.

Supplementary Table 17. Simulated summer  $\Delta c_{\text{SIA}}/\Delta c_{\text{SO}_4^{2-}}$ ,  $\Delta c_{\text{SIA}}/\Delta c_{\text{NO}_3^T}$ , and  $\Delta c_{\text{SIA}}/\Delta c_{\text{NH}_4^T}$  with 70% reductions.

Supplementary Table 18. Simulated winter  $\Delta c_{\text{SIA}}/\Delta c_{\text{SO}_4^{2-}}$ ,  $\Delta c_{\text{SIA}}/\Delta c_{\text{NO}_3^T}$ , and  $\Delta c_{\text{SIA}}/\Delta c_{\text{NH}_4^T}$  with 10% reductions.

Supplementary Table 19. Simulated winter  $\Delta c_{\text{SIA}}/\Delta c_{\text{SO}_4^{2-}}$ ,  $\Delta c_{\text{SIA}}/\Delta c_{\text{NO}_3^T}$ , and  $\Delta c_{\text{SIA}}/\Delta c_{\text{NH}_4^T}$  with 40% reductions.

Supplementary Table 20. Simulated winter  $\Delta c_{\text{SIA}}/\Delta c_{\text{SO}_4^{2-}}$ ,  $\Delta c_{\text{SIA}}/\Delta c_{\text{NO}_3^T}$ , and  $\Delta c_{\text{SIA}}/\Delta c_{\text{NH}_4^T}$  with 70% reductions.



## Supplementary Texts

### Supplementary Text 1. Relationships between emissions and observed concentrations.

Results of orthogonal distance regressions (ODR) between annual mean concentrations and emissions for the five regions are shown in Extended Data Fig. 3. Trends and correlations for 2011 – 2015 and 2016 – 2020 were also examined separately (Supplementary Table 4 and Extended Data Fig. 3a). The slope for  $\text{SO}_2$ - $c_{\text{SO}_4^{2-}}$  varied significantly from 2011 – 2015 to 2016 – 2020 in the Western US, likely because the region experienced more cross-border transport and wildfires<sup>1</sup>. Wildfire contribution to  $\text{SO}_2$  emissions in the Western US increased from 3 – 14% between 2011 – 2015 to 5 – 30% between 2016 – 2020<sup>2</sup>. The Northeastern US has a high slope, likely because  $\text{SO}_2$  emissions in the region were already low, and the region benefited from upwind  $\text{SO}_2$  emission reductions in the Midwestern US. In fact,  $c_{\text{SO}_4^{2-}}$  in the Northeastern US correlated better with  $\text{SO}_2$  emissions from the Midwestern US. Accounting for this, the regression slopes for all regions except for the Western US are relatively consistent and in agreement with previous studies for  $\text{SO}_2$ - $c_{\text{SO}_4^{2-}}$  regressions<sup>3</sup>. This highlights the importance of regional transport and makes the case for cross-region efforts to mitigate  $\text{PM}_{2.5}$  precursors. The effectiveness of  $\text{SO}_2$  emission abatement on  $c_{\text{SO}_4^{2-}}$  reduction could decrease as reductions in  $\text{SO}_2$  and  $\text{NO}_x$  emissions continue because of enhanced  $\text{SO}_2$  oxidation as the acidity of aerosols and fog and cloud droplets lowered<sup>4-6</sup>. However, this effect is more pronounced in winter and colder regions, where sulfate containing SIA may not be as important as  $\text{NH}_4\text{NO}_3$ .

Extended Data Fig. 3b shows that  $\text{NO}_x$ - $c_{\text{NO}_3^-}$  slopes were comparable in the Western, Midwestern, and Northeastern US but were low in the Central and Southeastern US. There have been discussions about the discrepancies between bottom-up and top-down  $\text{NO}_x$  emission estimates in the US, which has been most apparent in the Central and Southeastern US<sup>7</sup>. The low  $\text{NO}_x$ - $c_{\text{NO}_3^-}$  slopes could result from real-world  $\text{NO}_x$  emission reductions being lower than EPA estimates in these regions<sup>7</sup>. Jiang et al. found that in the Central US, the decrease in power plant emissions of  $\text{NO}_x$  slowed after 2011<sup>7</sup>. Satellite observations

indicate that the unexpected slowdown of  $\text{NO}_x$  emission reduction in the Southeastern US is linked to enhanced oil and natural gas activities<sup>8,9</sup>.  $c_{\text{NO}_3^{\text{T}}}$  responses to  $\text{NO}_x$  emission reductions may change dramatically as  $\text{NO}_x$  emission decreases. It was recently shown that the  $\text{NO}_x$ -to- $\text{NO}_3^{\text{T}}$  oxidation rate can be evaluated using the  $\text{NO}_x$ -volatile organic compounds (VOC) framework for ozone ( $\text{O}_3$ ) formation<sup>10</sup>. Certain regions could be  $\text{NO}_3^{\text{T}}$  limited for  $\text{NH}_4\text{NO}_3$  formation but  $\text{NO}_x$ -saturated for  $\text{NO}_3^{\text{T}}$  formation at the same time<sup>10</sup>. Controlling VOC in this case would be the best strategy to reduce  $\text{NH}_4\text{NO}_3$  formation initially. However, similar to the  $\text{O}_3$  control strategy, as  $\text{NO}_x$  emission reduces, the chemical regime would become  $\text{NO}_x$  limited, and controlling  $\text{NO}_x$  becomes the most effective strategy in reducing  $\text{NO}_3^{\text{T}}$  formation.

## Supplementary Text 2. Reactive nitrogen deposition trends.

To better illustrate changes in  $N_r$  deposition, we investigated changes of  $N_r$  deposition near and away from  $NH_3$  emission hotspots utilizing the Total Deposition Estimates Using the Measurement Model Fusion (TDep MMF) data<sup>11,12</sup>. The TDep MMF combines wet deposition observations from the National Trends Network (NTN), ambient air monitoring data from CASTNET, and simulations from the EPA's Air Quality Time Series (EQUATES) project<sup>2,13</sup>. EQUATES includes 2002 - 2019 air quality modeling using the Community Multiscale Air Quality (CMAQ) modeling system (v5.3.2) for the CONUS domain using a 12 km horizontal grid spacing<sup>13,14</sup>. The Air Pollutant Emissions Trends Data shown in Fig. 1 are consistent with the EQUATES emissions<sup>15</sup>. The CMAQ simulations in EQUATES consider the bidirectional exchange of  $NH_3$  for fertilizer emissions using the Environmental Policy Integrated Climate (EPIC) Model<sup>16</sup>. For species measured by CASTNET ( $HNO_3$ ,  $SO_4^{2-}$ ,  $NO_3^-$ , and  $NH_4^+$ ), the TDep MMF estimates dry deposition using observed concentrations and CMAQ modeled deposition velocities<sup>11,12</sup>.  $NH_3$  observations from AMoN were used to evaluate CMAQ simulations but were not included in the deposition estimates<sup>11</sup>. The TDep MMF wet deposition estimates were calculated from the annual precipitation-weighted concentrations from NTN and a modified version of the annual precipitation estimates obtained from the PRISM Climate Group<sup>11</sup>. We did not include organic  $N_r$  deposition when calculating total  $N_r$  because of the large uncertainty<sup>17</sup>.

Dividing the CONUS into four zones (<50 km, 50 - 150 km, 150 - 300 km, and >300 km), we analyze the trends of annual  $N_r$  total deposition and  $N_r$  deposition components based on the TDep MMF between 2010 and 2019 (Fig. 3 and Supplementary Fig. 7). The areas of the 95<sup>th</sup> percentile of  $NH_3$  emission rates across the U.S. based on the 2017 EQUATES  $NH_3$  emissions<sup>2</sup> are considered  $NH_3$  emission hotspots, except for sporadic locations with just one 12 km  $\times$  12 km grid. Figure 3a shows the contours of the four zones. The trends, slopes ( $m$ ), intercepts ( $b$ ), and relative change rate ( $m_r = m/b$ ) are determined using the Mann-Kendall test and the Theil-Sen regression ( $p < 0.05$ )<sup>18</sup>. Despite the reductions in  $NO_3^T$  deposition,  $N_r$  total deposition showed statistically significant increasing trends only in areas within 150

km of a  $\text{NH}_3$  emission hotspot between 2010 and 2019 because of the rapid increases in  $\text{NH}_4^{\text{T}}$  deposition. Because of the rapid growths of  $\text{NH}_4^{\text{T}}$  dry deposition, the relative increasing rates in  $\text{NH}_4^{\text{T}}$  deposition were faster than increases in  $\text{NH}_3$  emissions in the corresponding zones. This corroborates our aerosol thermodynamic analysis that indicates increased  $\text{N}_r$  deposition near  $\text{NH}_3$  hotspots.

The zones and trends change significantly when  $\text{NH}_3$  hotspots identified by satellite observations are used to define the zones (Supplementary Fig. 8), highlighting the uncertainty of  $\text{NH}_4^{\text{T}}$  deposition from the TDep MMF data. These hotspots are defined as the areas of the 95<sup>th</sup> percentile of  $\text{NH}_3$  column amounts across the US. Extended Data Fig. 6 compares the 2017 EQUATES  $\text{NH}_3$  emissions and a high-resolution (~2 km) annual  $\text{NH}_3$  column map derived from Infrared Atmospheric Sounding Interferometer (IASI, v2.2R) observations from 2008 – 2017<sup>19</sup>. The EQUATES emission hotspots in the Central and Southeastern US are not identified by the satellite map. Consequently, areas far away (>300 km) from a satellite hotspot encompass several EQUATES emission hotspots and have the fastest relative increasing rate of  $\text{NH}_4^{\text{T}}$  total deposition based on the TDep MMF data (Supplementary Fig. 8). The significant differences show the uncertainties of current  $\text{NH}_4^{\text{T}}$  deposition estimates and highlight the need for more  $\text{NH}_3$  concentration and flux observations. More observations are needed in these areas in the Central and Southeastern US, where emission and satellite hotspots show the largest discrepancy but only a few AMoN sites are available.

### Supplementary Text 3. The chemical regime of SIA formation and inorganic N<sub>r</sub> deposition.

SIA response to a reduction in  $c_{\text{NH}_4^{\text{T}}}$  is highly sensitive to the SIA formation regime. When  $\text{NH}_4^{\text{T}}$  exists fully as gaseous  $\text{NH}_3$ , reducing  $c_{\text{NH}_4^{\text{T}}}$  decreases  $c_{\text{NH}_3}$  but not  $c_{\text{SIA}}$  ( $\text{NH}_4^{\text{T}}$ -insensitive). When  $\text{NH}_4^{\text{T}}$  is limited relative to  $\text{H}_2\text{SO}_4$  and partitions fully to the aerosol, reducing  $c_{\text{NH}_4^{\text{T}}}$  removes particulate  $\text{NH}_4^+$  and the reduction in  $c_{\text{SIA}}$  ( $\Delta c_{\text{SIA}}$ ) is equivalent to the  $c_{\text{NH}_4^{\text{T}}}$  removed ( $\Delta c_{\text{NH}_4^{\text{T}}}$ ). When  $\text{NH}_4^{\text{T}}$  exceeds  $\text{H}_2\text{SO}_4$ , ammonium nitrate ( $\text{NH}_4\text{NO}_3$ ) can form via reaction of  $\text{NH}_3$  and  $\text{HNO}_3$ . The extent of  $\text{NH}_4\text{NO}_3$  formation depends on the product of  $\text{NH}_3$  and  $\text{HNO}_3$  concentrations and on environmental conditions. Increased  $\text{NH}_4\text{NO}_3$  formation occurs at lower temperature and higher relative humidity. Reducing  $\text{NH}_4^{\text{T}}$  in this regime can also remove  $\text{HNO}_3$  from the aerosol, producing a multiplier effect because  $\text{NH}_4^+$  and  $\text{NO}_3^-$  are removed together, leading to a  $\Delta c_{\text{SIA}}/\Delta c_{\text{NH}_4^{\text{T}}}$  of as much as 4.4<sup>20</sup>. Overall,  $\text{NH}_4^{\text{T}}$  partitions between  $\text{NH}_3$  and particulate  $\text{NH}_4^+$  as it neutralizes  $\text{SO}_4^{2-}$  and  $\text{NO}_3^-$ , with the partitioning dependent on aerosol composition (including  $c_{\text{NO}_3^-}$ ,  $c_{\text{SO}_4^{2-}}$ , and  $c_{\text{NVC}}$  that can also neutralize sulfate and nitrate), temperature, and relative humidity. Therefore,  $\Delta c_{\text{SIA}}/\Delta c_{\text{NH}_4^{\text{T}}}$  is highly condition-dependent and can change with the size of reduction of any precursor.

We use ISOROPIA II to simulate  $\Delta c_{\text{SIA}}$  with three reduction levels (10%, 40%, and 70%) for each precursor from 2011-2020 (Supplementary Fig. 9 – 11). The sensitivities of  $c_{\text{SIA}}$  to precursor reductions are calculated as the ratios between changes in  $\Delta c_{\text{SIA}}$  and corresponding changes in precursor concentrations ( $\Delta c_p$ ).  $\Delta c_{\text{SIA}}/\Delta c_{\text{NH}_4^{\text{T}}}$  generally varies more from low to high reduction levels (orange areas in Extended Data Fig. 7) than  $\Delta c_{\text{SIA}}/\Delta c_{\text{SO}_4^{2-}}$  and  $\Delta c_{\text{SIA}}/\Delta c_{\text{NO}_3^-}$  (blue and green areas in Extended Data Fig. 7, respectively). Note that  $\Delta c_{\text{SIA}}/\Delta c_{\text{SO}_4^{2-}}$  would decrease significantly leading to larger variations than  $\Delta c_{\text{SIA}}/\Delta c_{\text{NH}_4^{\text{T}}}$  with a 70% reduction in  $c_{\text{SO}_4^{2-}}$  in the Western and Central US because of substantial increases in  $c_{\text{NO}_3^-}$  in aerosols needed to balance NVCs. The delicate balance between sulfate and NVCs also leads to the large uncertainty of  $\Delta c_{\text{SIA}}/\Delta c_{\text{SO}_4^{2-}}$  in the Western US (Supplementary Table 14). The

large variability of  $\Delta c_{\text{SIA}}/\Delta c_{\text{NH}_4^{\text{T}}}$  highlights the importance of accurately determining SIA formation regime when evaluating the effectiveness of  $\text{NH}_3$  control.

The SIA formation regime is also evaluated using aerosol property-based regime diagrams. Extended Data Fig. 8 illustrates the chemical regime changes and associated impacts on SIA formation and  $\text{N}_r$  deposition. In summer, warm conditions favor the formation of  $(\text{NH}_4)_2\text{SO}_4$ , and the “1:2 line” indicates the condition that two molecules of  $\text{NH}_4^+$  explicitly balance one molecule of  $\text{SO}_4^{2-}$  to form  $(\text{NH}_4)_2\text{SO}_4$  with no  $\text{NH}_3\text{g}$ . From 2011 to 2020, mean conditions in all RPOs started above the line and moved further away from the line (Extended Fig. 8a – e), indicating that  $c_{\text{SO}_4^{2-}}$  was the limiting factor. It also shows that there were ample amounts of  $\text{NH}_4^{\text{T}}$ , and the importance of  $\text{NH}_4\text{NO}_3$  formation has increased between 2011-2022, even in the summer.

The chemical regime of  $\text{NH}_4\text{NO}_3$  formation depends not only on  $c_{\text{NH}_4^{\text{T}}}$  and  $c_{\text{NO}_3^{\text{T}}}$  but also on  $\text{T}$ ,  $\text{RH}$ ,  $c_{\text{SO}_4^{2-}}$ ,  $c_{\text{NVC}}$ . Rather than using  $c_{\text{NH}_4^{\text{T}}}$  and  $c_{\text{NO}_3^{\text{T}}}$  to determine the chemical regime of  $\text{NH}_4\text{NO}_3$  formation, we use the chemical and deposition regime definition developed by Nenes et al. (2020)<sup>20,21</sup> in this study, and a brief overview is provided here. Because of the semi-volatile nature of  $\text{NH}_4\text{NO}_3$ , both  $\text{NH}_4^{\text{T}}$  and  $\text{NO}_3^{\text{T}}$  remain partially in the gas phase. The sensitivity of  $c_{\text{SIA}}$  to changes in  $c_{\text{NO}_3^{\text{T}}}$  is proportional to the changes in  $c_{\text{NO}_3^-}$ :

$$\frac{\partial c_{\text{SIA}}}{\partial c_{\text{NO}_3^{\text{T}}}} = \zeta \frac{\partial c_{\text{NO}_3^-}}{\partial c_{\text{NO}_3^{\text{T}}}} = \zeta \varepsilon_{\text{NO}_3^-} \quad (\text{S1})$$

where  $\varepsilon_{\text{NO}_3^-}$  is the fraction of  $\text{NO}_3^{\text{T}}$  that partitions into aerosols. For  $\text{NH}_4\text{NO}_3$  aerosol,  $\zeta = \frac{80}{62} \approx 1.29$ .

Similarly, the sensitivity of  $c_{\text{SIA}}$  to changes in  $c_{\text{NH}_4^{\text{T}}}$  can be expressed as:

$$\frac{\partial c_{\text{SIA}}}{\partial c_{\text{NH}_4^{\text{T}}}} = \lambda \frac{\partial c_{\text{NH}_4^+}}{\partial c_{\text{NH}_4^{\text{T}}}} = \lambda \varepsilon_{\text{NH}_4^+} \quad (\text{S2})$$

where  $\varepsilon_{\text{NH}_4^+}$  is the fraction of  $\text{NH}_4^{\text{T}}$  that partitions into aerosols. For  $\text{NH}_4\text{NO}_3$  aerosol,  $\lambda = \frac{80}{17} \approx 4.4$ .

Similarly, deposition of  $\text{NO}_3^{\text{T}}$  and  $\text{NH}_4^{\text{T}}$  can be expressed using  $\varepsilon_{\text{NO}_3^-}$  and  $\varepsilon_{\text{NH}_4^+}$ , respectively, as:

$$F_{\text{NO}_3^{\text{T}}} = \frac{v_g c_{\text{HNO}_3\text{g}}}{\mu_{\text{HNO}_3\text{g}}} + \frac{v_p c_{\text{NO}_3^-}}{\mu_{\text{NO}_3^-}} = v_p (k + (1 - k) \varepsilon_{\text{NO}_3^-}) c_{\text{NO}_3^{\text{T}}} / \mu_{\text{NO}_3^-} \quad (\text{S3})$$

$$F_{\text{NH}_4^{\text{T}}} = v_g / \mu_{\text{NH}_3\text{g}} + v_p c_{\text{NH}_4^+} / \mu_{\text{NH}_4^+} = v_p (k + (1 - k) \varepsilon_{\text{NH}_4^+}) c_{\text{NH}_4^{\text{T}}} / \mu_{\text{NH}_4^+} \quad (\text{S4})$$

where  $v_g$  and  $v_p$  are the gas- and particulate-phase deposition velocities, respectively, and  $k = v_g / v_p$ .  $k$  is of the order around  $10^{21}$ .

Nenes et al. (2020)<sup>20</sup> showed that  $\varepsilon_{\text{NO}_3^-}$  and  $\varepsilon_{\text{NH}_4^+}$  can be expressed as

$$\varepsilon_{\text{NO}_3^-} = \frac{\Psi \text{ AWC}}{10^{-\text{pH}} + \Psi \text{ AWC}}, \Psi = \frac{RT K_{n1} H_{\text{HNO}_3}}{\gamma_{\text{H}^+} \gamma_{\text{NO}_3^-}} \quad (\text{S5})$$

$$\varepsilon_{\text{NH}_4^+} = \frac{\Phi 10^{-\text{pH}} \text{ AWC}}{1 + 10^{-\text{pH}} \Phi \text{ AWC}}, \Phi = \frac{\gamma_{\text{H}^+}}{\gamma_{\text{NH}_4^+}} \frac{H_{\text{NH}_3}}{K_a} RT \quad (\text{S6})$$

where  $H_{\text{HNO}_3}$ ,  $K_{n1}$ ,  $R$ ,  $\gamma_{\text{H}^+}$ ,  $\gamma_{\text{NO}_3^-}$  are the Henry's law coefficient of  $\text{HNO}_3$ , acid dissociation constant of  $\text{HNO}_3$ , the universal gas constant, the single-ion activity of  $\text{H}^+$  and  $\text{NO}_3^-$ , respectively; and  $H_{\text{NH}_3}$  and  $K_a$  are the Henry's law and dissociation constants for  $\text{NH}_3$ , respectively; and  $\gamma_{\text{NH}_4^+}$  is the single-ion activity coefficient for  $\text{NH}_4^+$ .

Defining critical fractions of  $\varepsilon_{\text{NO}_3^-}$  and  $\varepsilon_{\text{NH}_4^+}$  as  $\alpha$  and  $\beta$ , respectively, it is said that the aerosol is sensitive to  $\text{NH}_4^{\text{T}}$  or  $\text{NO}_3^{\text{T}}$ , when  $\varepsilon_{\text{NO}_3^-} > \alpha$  or  $\varepsilon_{\text{NH}_4^+} > \beta$ . The relationship is opposite for  $\text{NO}_3^{\text{T}}$  and  $\text{NH}_4^{\text{T}}$  deposition. The deposition is considered fast, when  $\varepsilon_{\text{NO}_3^-} < \alpha$  or  $\varepsilon_{\text{NH}_4^+} < \beta$ . Based on Eq. (10) and (11), the critical pH that determines  $\text{NO}_3^{\text{T}}$  and  $\text{NH}_4^{\text{T}}$  sensitive regime can be derived as:

$$\text{pH}' = -\log\left(\frac{1 - \alpha}{\alpha} \Psi \text{ AWC}\right) \quad (\text{S7})$$

$$\text{pH}'' = \log\left(\frac{1 - \beta}{\beta} \Phi \text{ AWC}\right) \quad (\text{S8})$$

To show a balanced picture for both SIA formation and  $N_r$  deposition,  $\alpha$  and  $\beta$  are both set to 0.5, which divides the aerosol pH and AWC domain the four regimes listed in Extended Data Fig. 8f - o. However, even with this approach, there are still intra-annual variabilities of the chemical regime boundaries, highlighting the strong dependence of  $NH_4NO_3$  formation on ambient conditions. Chemical regimes in all RPOs generally shifted towards regimes I and II, where SIA formation is less sensitive to  $NH_4^T$  and  $NH_4^T$  deposits as fast as  $NH_3$ . In 2020, only MANE-VU and SESARM remained sensitive to both  $NH_4^T$  and  $NO_3^T$  reductions (Regime III) during the winter but were also approaching the boundaries.



## Supplementary Figures

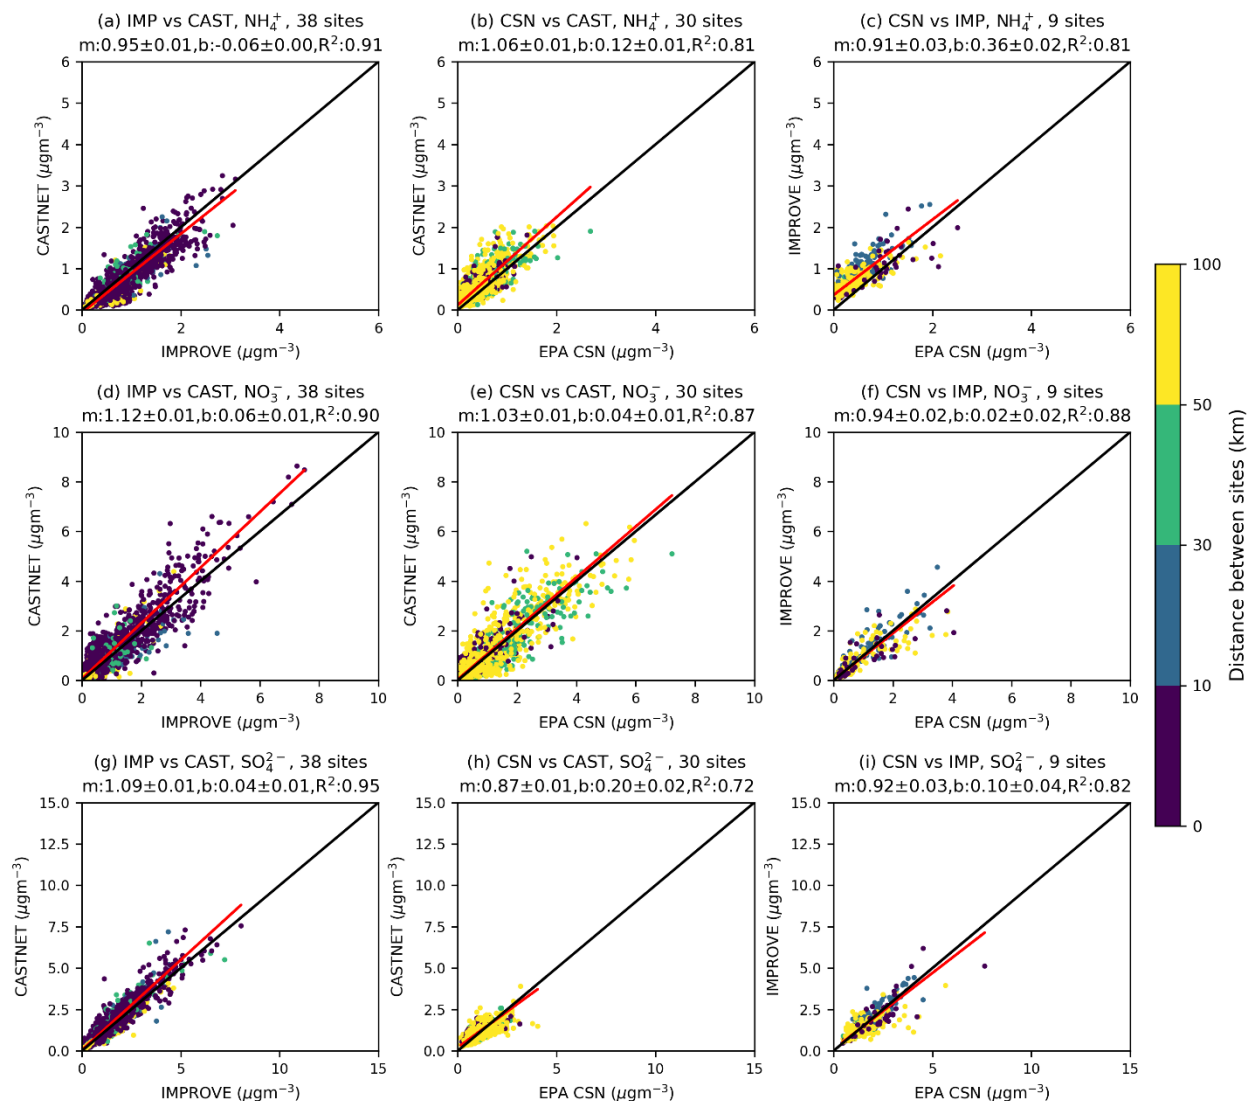

**Supplementary Figure 1. Intercomparison of weekly integrated  $c_{\text{SO}_4^{2-}}$ ,  $c_{\text{NO}_3^-}$ , and  $c_{\text{NH}_4^+}$  observations from CASTNET, IMPROVE, and EPA CSN networks.** Data points are colored by distances between the sites. Red lines show the orthogonal distance regression results, and the slopes, the offsets, and the determination coefficients ( $R^2$ ) are listed below panel titles. Black lines show the 1:1 line. The uncertainties of the slopes and the offsets are the 95% confidence intervals (CI; mean  $\pm$  1.96 standard deviation (SD)). The numbers of samples are listed in Supplementary Table 8.

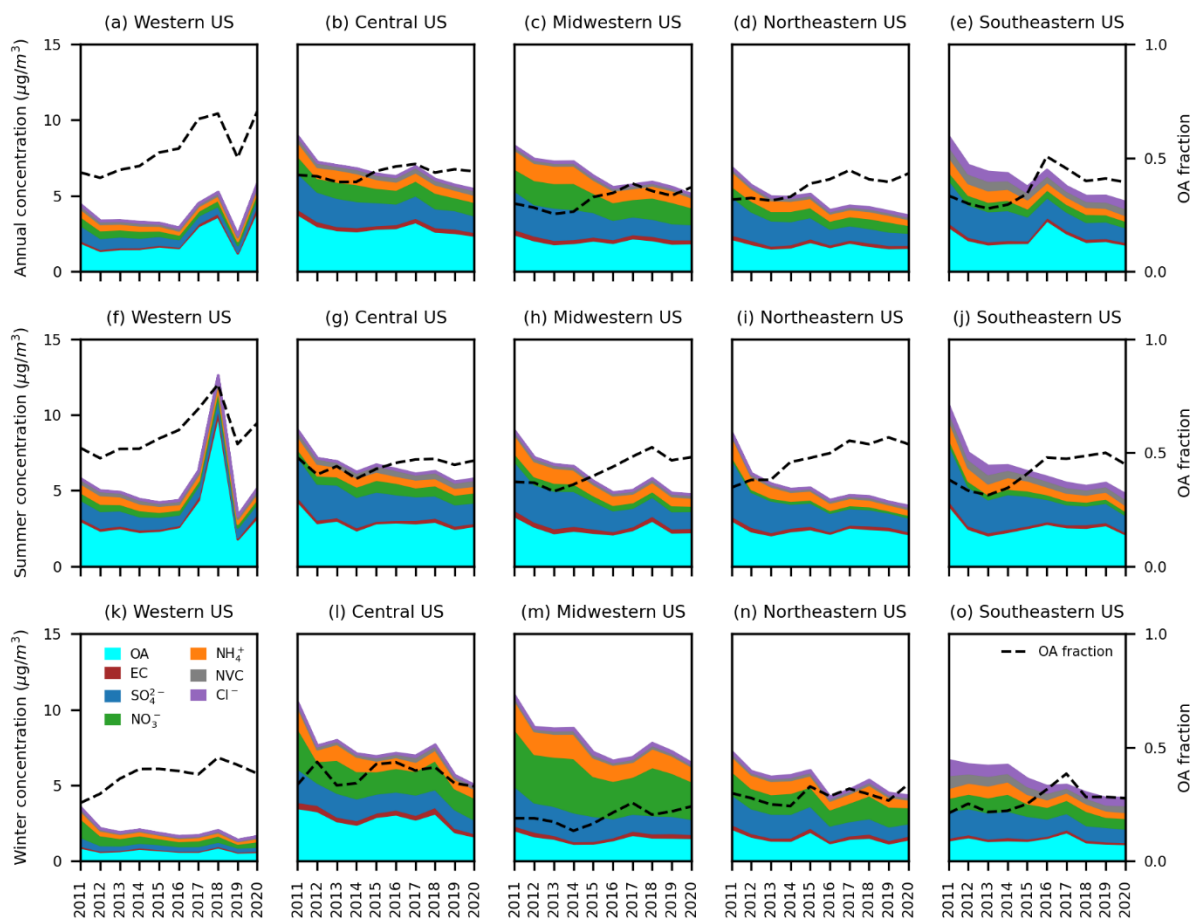

**Supplementary Figure 2. Mean annual, summer, and winter  $PM_{2.5}$  composition observed at IMPROVE and CSN sites with collocated observations.** Cyan, brown, blue, green, orange, grey, and purple areas are organic aerosols (OA; calculated as 1.8 times the total organic carbon measured on the quartz filter), elemental carbon (EC), sulfate ( $SO_4^{2-}$ ), nitrate ( $NO_3^-$ ), ammonium ( $NH_4^+$ ), non-volatile cations (NVC), and chloride ( $Cl^-$ ), respectively. Black dashed lines show relative mass contributions of OA to  $PM_{2.5}$ .

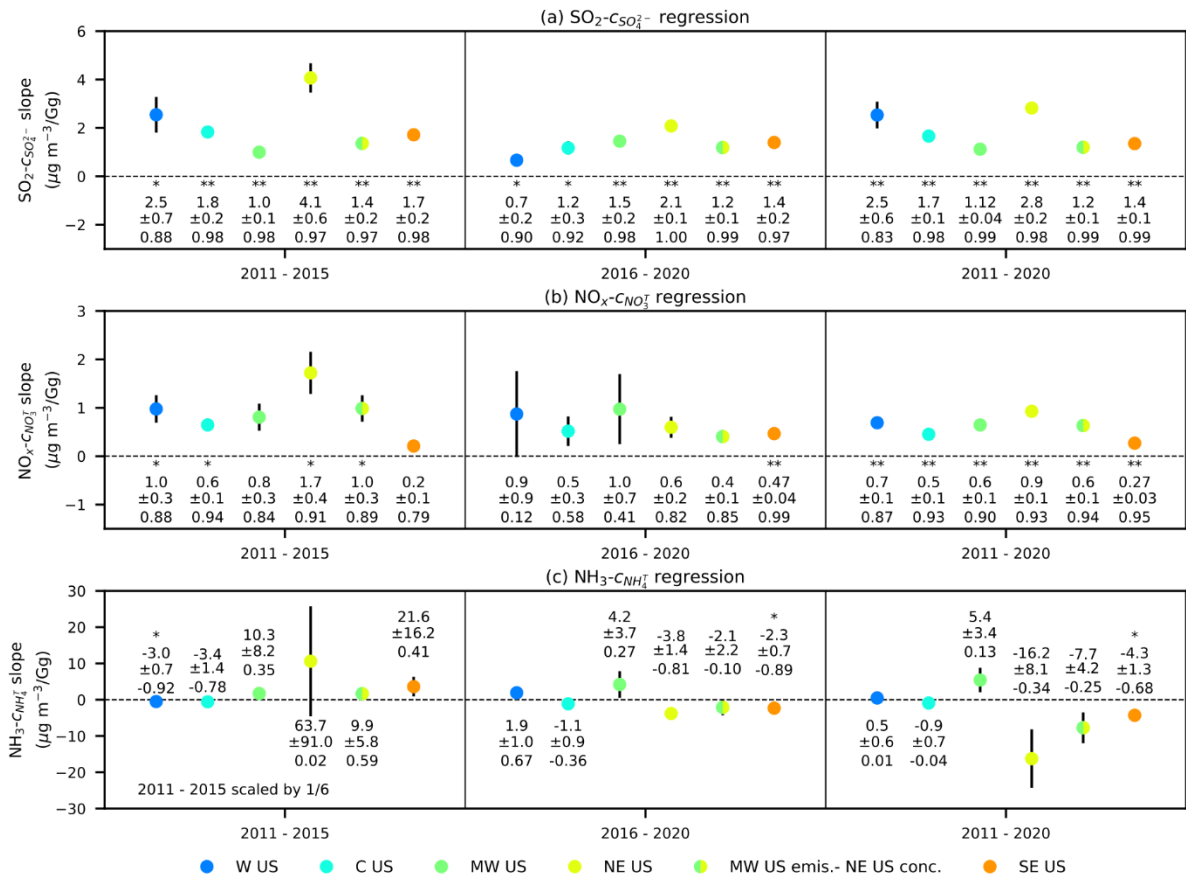

**Supplementary Figure 3. Relationships between emissions and regional mean concentrations observed at long-term sites.** Panels (a – c) present the orthogonal distance regression slopes of (a)  $\text{SO}_2$  emission- $c_{\text{SO}_2}$ , (b)  $\text{NO}_x$  emissions- $c_{\text{NO}_x}$ , and (c)  $\text{NH}_3$  emission- $c_{\text{NH}_3}$  regressions for 2011 – 2015, 2016 – 2020, and 2011 – 2020 with observations from long-term sites only. Long-term sites are the ones established before 2015. “W US”, “C US”, “MW US”, “NE US”, “SE US” stand for the Western, Central, Midwestern, Northeastern, Southeastern US, respectively. Regional mean concentrations are used in the regressions, and the sample sizes for each region are 5, 5, and 10 for 2011 – 2015, 2016 – 2020, and 2011 – 2020, respectively. “\*” or “\*\*” indicate the regression has a  $p < 0.05$  or  $p < 0.01$ , respectively. The error bars show uncertainties of the regression slopes (95% CI; calculated as  $\pm 1.96$  standard deviation (SD)). The numbers below are the slopes (mean values), the uncertainties ( $\pm 1.96$  SD), and the Pearson correlation coefficients, respectively. To illustrate  $\text{NH}_3$ - $c_{\text{NH}_3}$  correlation results for 2011 – 2015 in panel (c), they are scaled by 1/6.

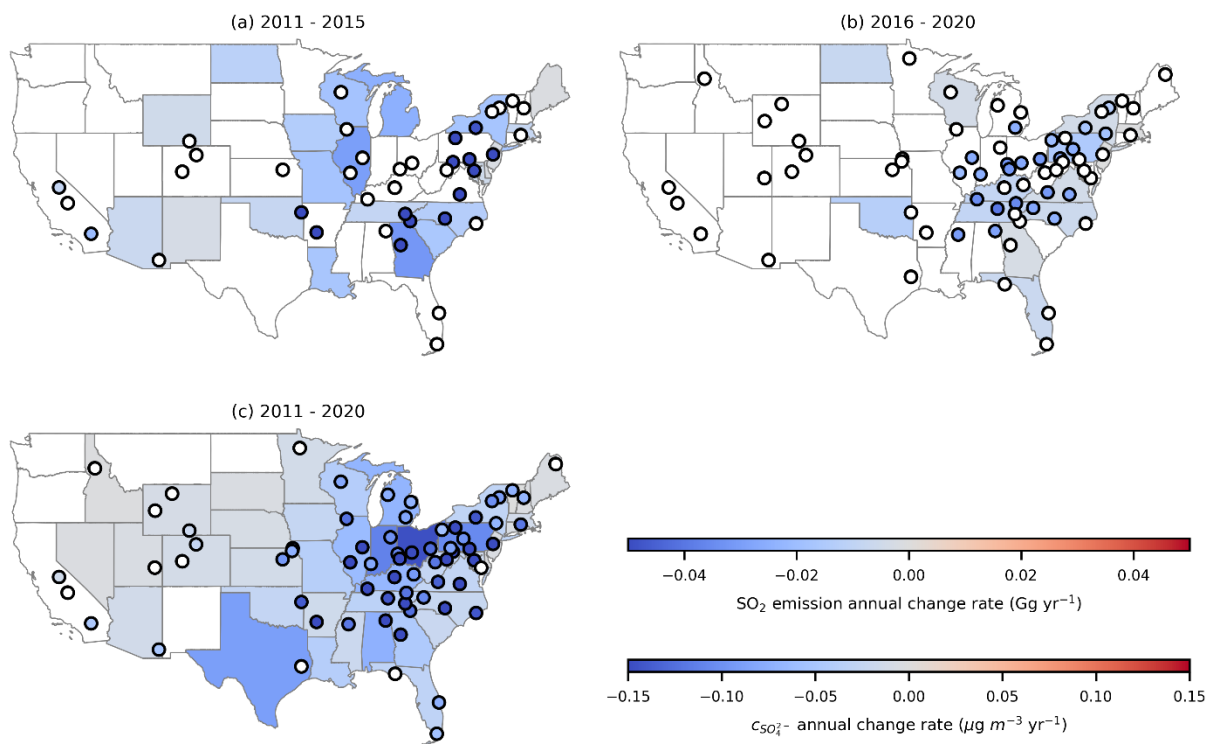

**Supplementary Figure 4. SO<sub>2</sub> emission and c<sub>SO<sub>2</sub></sub>- trends.** Emission and concentration trends are derived from Theil-Sen regressions of 5-, 5-, and 10-years data for the periods of 2011 – 2015, 2016 – 2020, and 2011 – 2020 (sample size = 5, 5, and 10), respectively. Emission trends for the states and sites are shown by state color and circle color, respectively. The regions with p<0.05 from the Mann-Kendall (MK) test are white. The base map is obtained from Natural Earth.

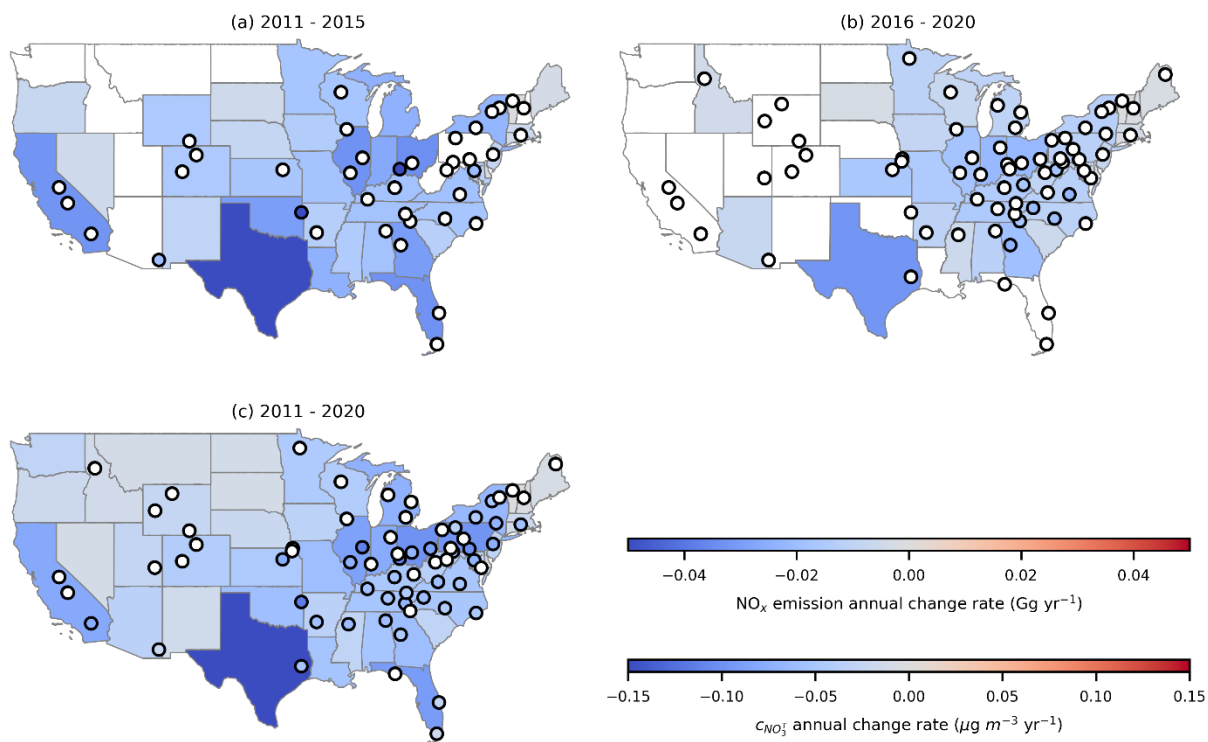

**Supplementary Figure 5. NO<sub>x</sub> emission and c<sub>NO<sub>3</sub></sub> trends.** Emission and concentration trends are derived from Theil-Sen regressions of 5-, 5-, and 10-years data for the periods of 2011 – 2015, 2016 – 2020, and 2011 – 2020 (sample size = 5, 5, and 10), respectively. Emission trends for the states and sites are shown by state color and circle color, respectively. The regions with  $p < 0.05$  from the Mann-Kendall (MK) test are white. The base map is obtained from Natural Earth.

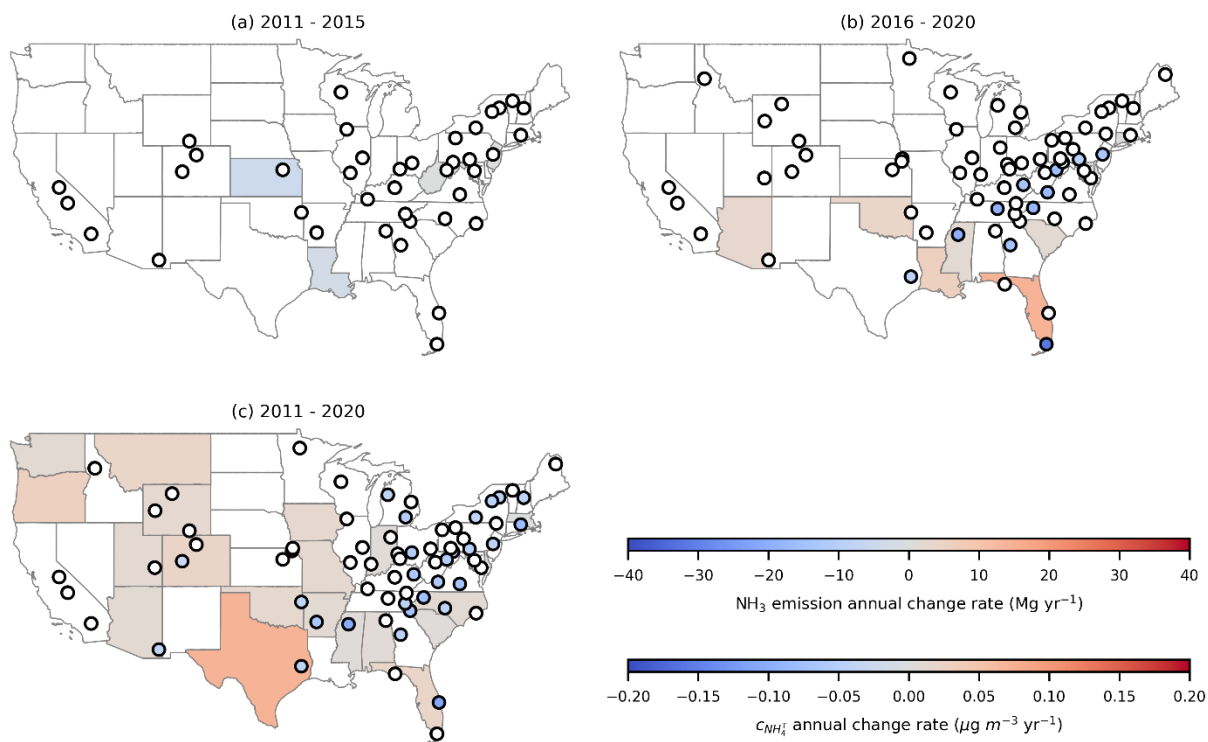

**Supplementary Figure 6. NH<sub>3</sub> emission and  $c_{\text{NH}_4}$  trends.** Emission and concentration trends are derived from Theil-Sen regressions of 5-, 5-, and 10-years data for the periods of 2011 – 2015, 2016 – 2020, and 2011 – 2020 (sample size = 5, 5, and 10), respectively. Emission trends for the states and sites are shown by state color and circle color, respectively. The regions with  $p < 0.05$  from the Mann-Kendall (MK) test are white. The base map is obtained from Natural Earth.

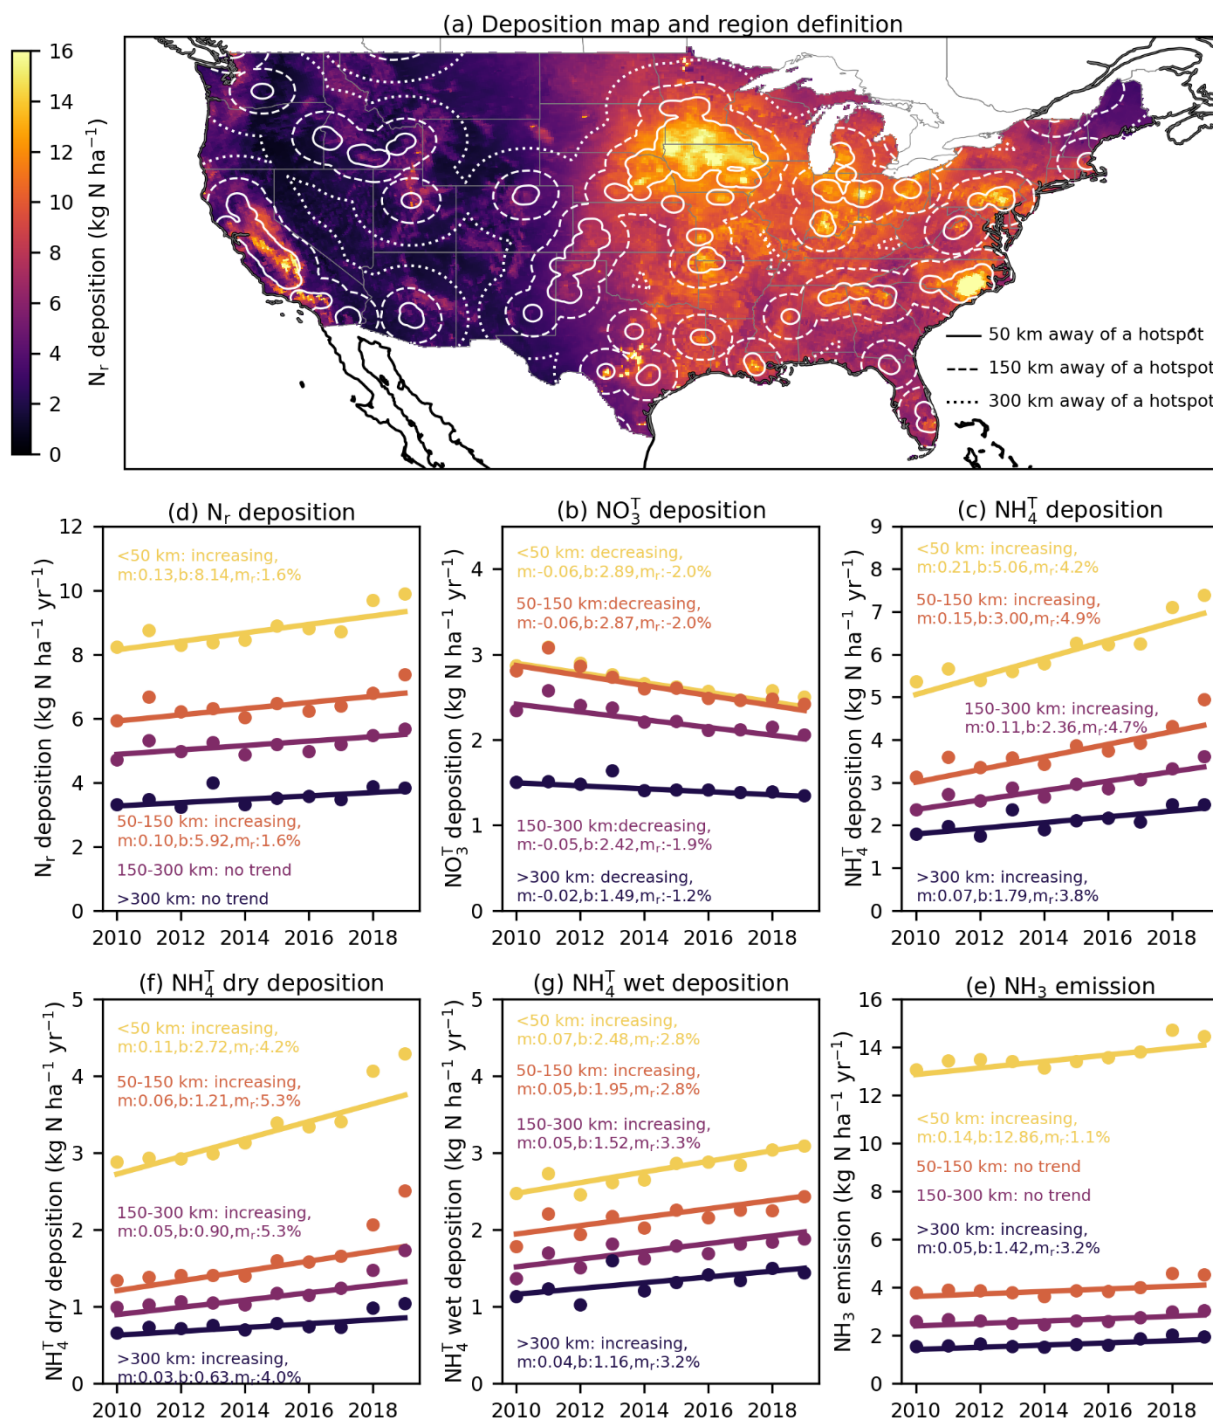

**Supplementary Figure 7. Trend analysis of total reactive nitrogen deposition.** Panel (a) shows the average annual total reactive nitrogen ( $\text{N}_r$ ) deposition in the US between 2010 and 2019. Solid, dashed, and dotted lines show the boundaries of the areas within 50 km, 150 km, and 300 km of an  $\text{NH}_3$  emission hotspot. The base map is from Natural Earth. Panels (b - g) show trends of total  $\text{N}_r$  deposition, total  $\text{NO}_3^-$  deposition, total  $\text{NH}_4^+$  deposition, dry  $\text{NH}_4^+$  deposition, and wet  $\text{NH}_4^+$  deposition, and  $\text{NH}_3$  emissions, respectively. Yellow, orange, purple, and blue dots are average deposition rates in the areas <50 km, 50 - 150 km, 150 - 300 km, and >300 km from an  $\text{NH}_3$  emission hotspot, respectively.  $\text{NH}_3$  emission hotspots are defined as the areas of the 95<sup>th</sup> or high  $\text{NH}_3$  emission rates in 2017 in the Contiguous US<sup>2</sup>. The trends and relative annual change rates are determined using the Mann-Kendall test and Theil-Sen regression with a sample size of  $10^{22}$ . Trends with  $p < 0.05$  are considered statistically significant.



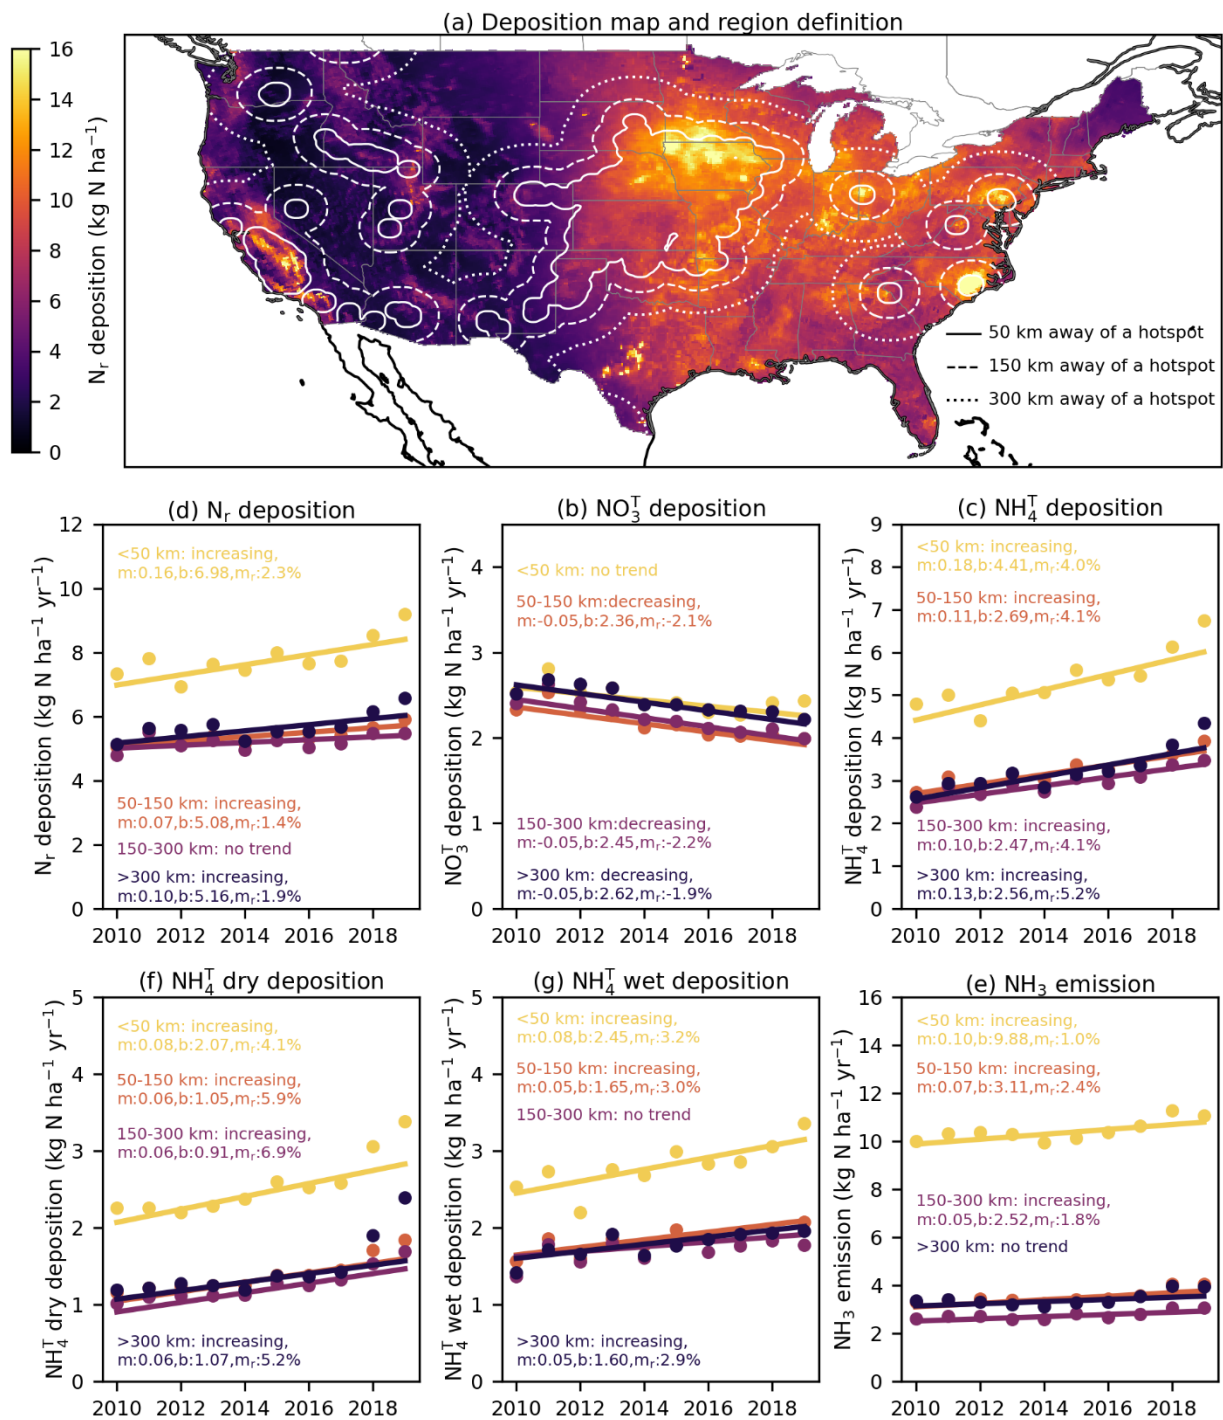

**Supplementary Figure 8.** Same as Supplementary Fig. 7 but regions are defined using satellite  $\text{NH}_3$  hotspots. The trends and relative annual change rates are determined using the Mann-Kendall test and Theil-Sen regression with a sample size of  $10^{22}$ . The base map is obtained from Natural Earth.



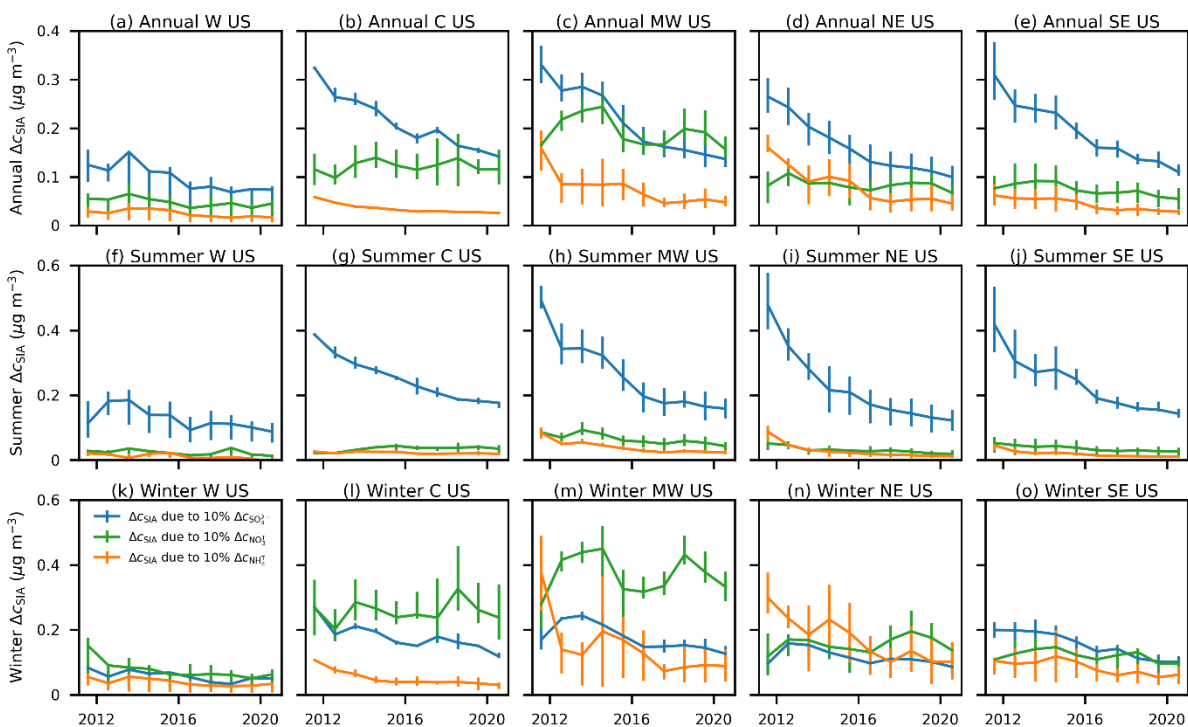

**Supplementary Figure 9. Regional means of annual, summer, and winter  $c_{\text{SIA}}$  changes ( $\Delta c_{\text{SIA}}$ ) due to 10% precursor reductions levels from 2011 to 2020.** Blue, green, and orange solid lines in panels show  $\Delta c_{\text{SIA}}$  due to 10% reductions in  $c_{\text{SO}_4^{2-}}$ ,  $c_{\text{NO}_3^-}$ , and  $c_{\text{NH}_4^+}$ , respectively. The vertical bars show the regional 25<sup>th</sup> and 75<sup>th</sup> percentiles of  $\Delta c_{\text{SIA}}$  within a region. “W US”, “C US”, “MW US”, “NE US”, “SE US” stand for the Western, Central, Midwestern, Northeastern, Southeastern US, respectively. The numbers of samples used to calculate the mean values for each region are listed in Supplementary Table 2.

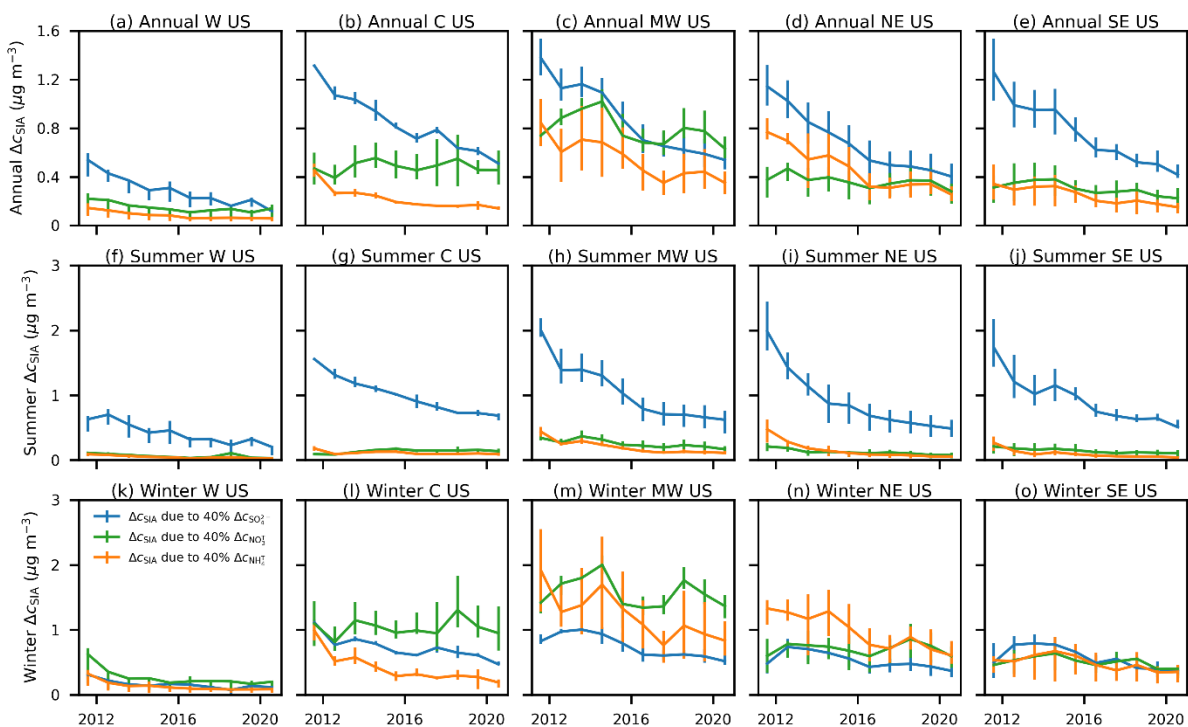

**Supplementary Figure 10. Regional means of annual, summer, and winter  $c_{\text{SIA}}$  changes ( $\Delta c_{\text{SIA}}$ ) due to 40% precursor reductions levels from 2011 to 2020.** Blue, green, and orange solid lines in panels show  $\Delta c_{\text{SIA}}$  due to 40% reductions in  $c_{\text{SO}_4^{2-}}$ ,  $c_{\text{NO}_3^-}$ , and  $c_{\text{NH}_4^+}$ , respectively. The vertical bars show the 25<sup>th</sup> and the 75<sup>th</sup> percentiles of  $\Delta c_{\text{SIA}}$  within a region. “W US”, “C US”, “MW US”, “NE US”, “SE US” stand for the Western, Central, Midwestern, Northeastern, Southeastern US, respectively. The numbers of samples used to calculate the mean values for each region are listed in Supplementary Table 2.

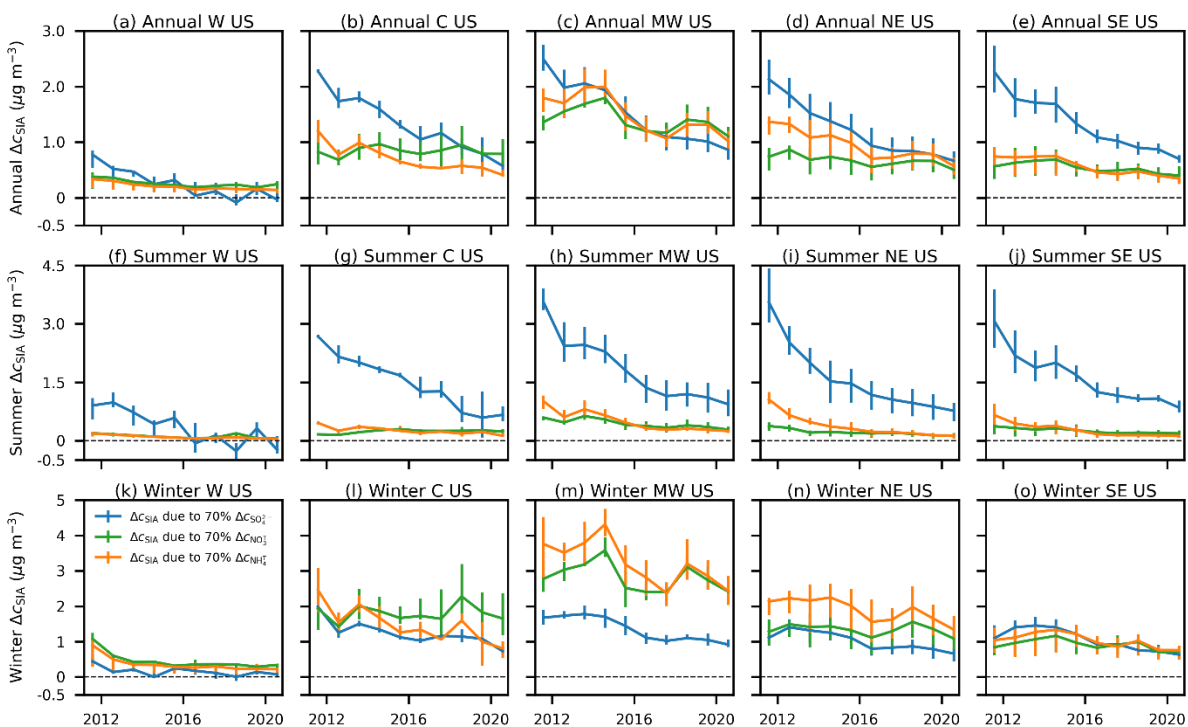

**Supplementary Figure 11. Regional means of annual, summer, and winter  $c_{\text{SIA}}$  changes ( $\Delta c_{\text{SIA}}$ ) due to 70% precursor reductions levels from 2011 to 2020.** Blue, green, and orange solid lines in panels show  $\Delta c_{\text{SIA}}$  due to 40% reductions in  $c_{\text{SO}_4^{2-}}$ ,  $c_{\text{NO}_3^-}$ , and  $c_{\text{NH}_4^+}$ , respectively. The vertical bars show the 25<sup>th</sup> and 75<sup>th</sup> percentiles of  $\Delta c_{\text{SIA}}$  within a region. “W US”, “C US”, “MW US”, “NE US”, “SE US” stand for the Western, Central, Midwestern, Northeastern, Southeastern US, respectively. The numbers of samples used to calculate the mean values for each region are listed in Supplementary Table 2.

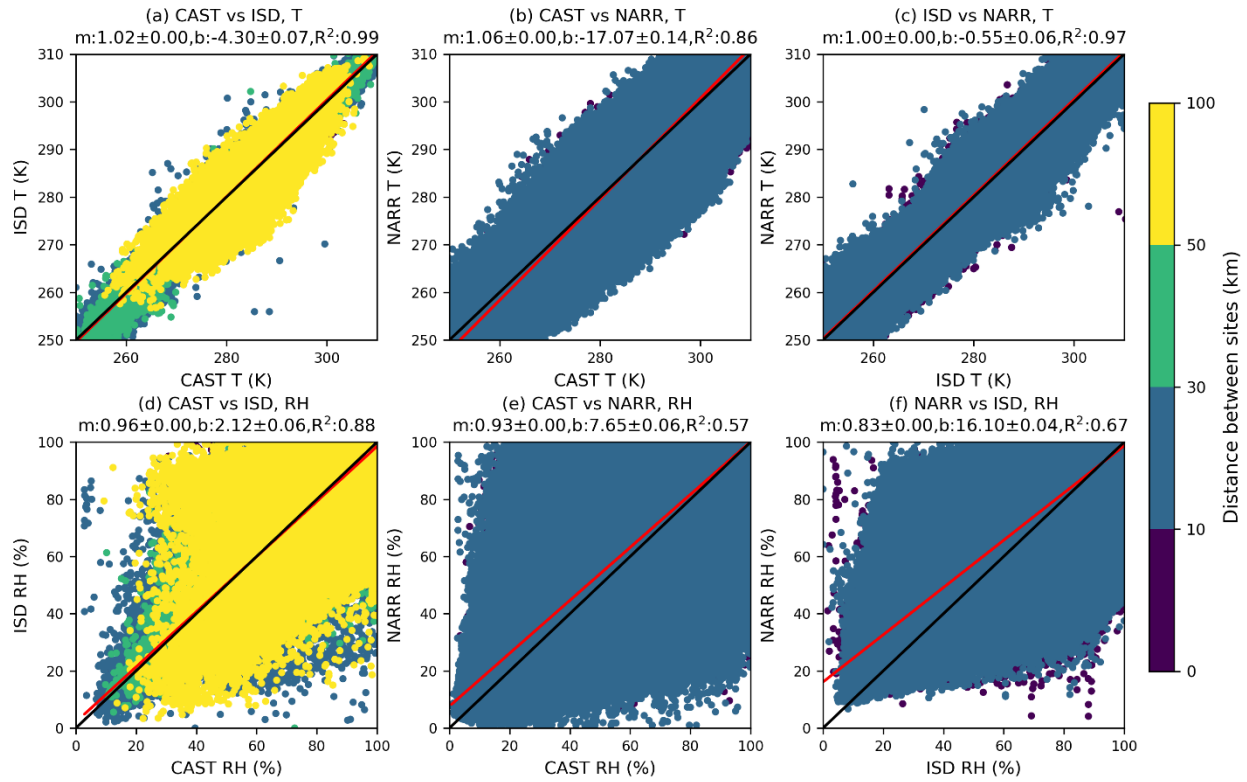

**Supplementary Figure 12. Intercomparison of biweekly averaged T and RH observations from CASTNET, ISD, and NARR datasets.** Data points are colored by distances between the sites. Red lines show the orthogonal distance regression results, and the slopes, offsets, and determination coefficients ( $R^2$ ) are listed below panel titles. Black lines show the 1:1 line. The uncertainties of the slopes and the offsets are the 95% confidence intervals (CI;  $\pm 1.96$  (SD)). The numbers of samples are listed in Supplementary Table 8.

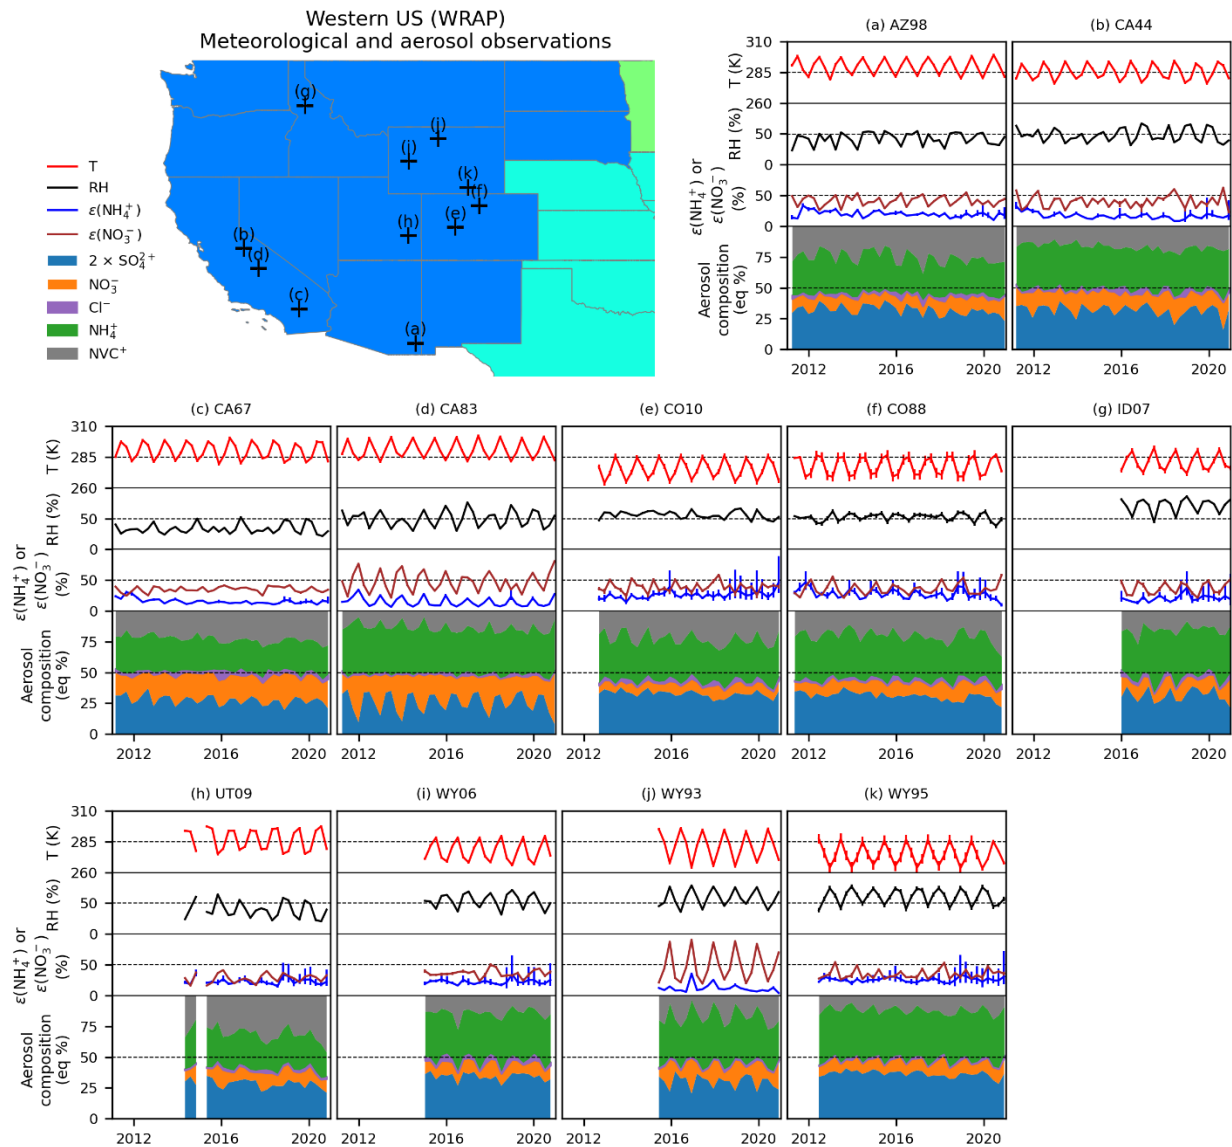

**Supplementary Figure 13. T, RH,  $\epsilon_{\text{NH}_4^+}$  and  $\epsilon_{\text{NO}_3^-}$ , and aerosol composition from sites within the Western US (WRAP).** Aerosol composition is calculated using ion-equivalent concentrations to reflect aerosol charge balance. Lines and bars in the top panels represent the mean values and the 95% CI (as the 2.5<sup>th</sup> to the 97.5<sup>th</sup> percentiles) of the corresponding variables derived from 1000 Monte Carlo simulations. The base map is obtained from Natural Earth.

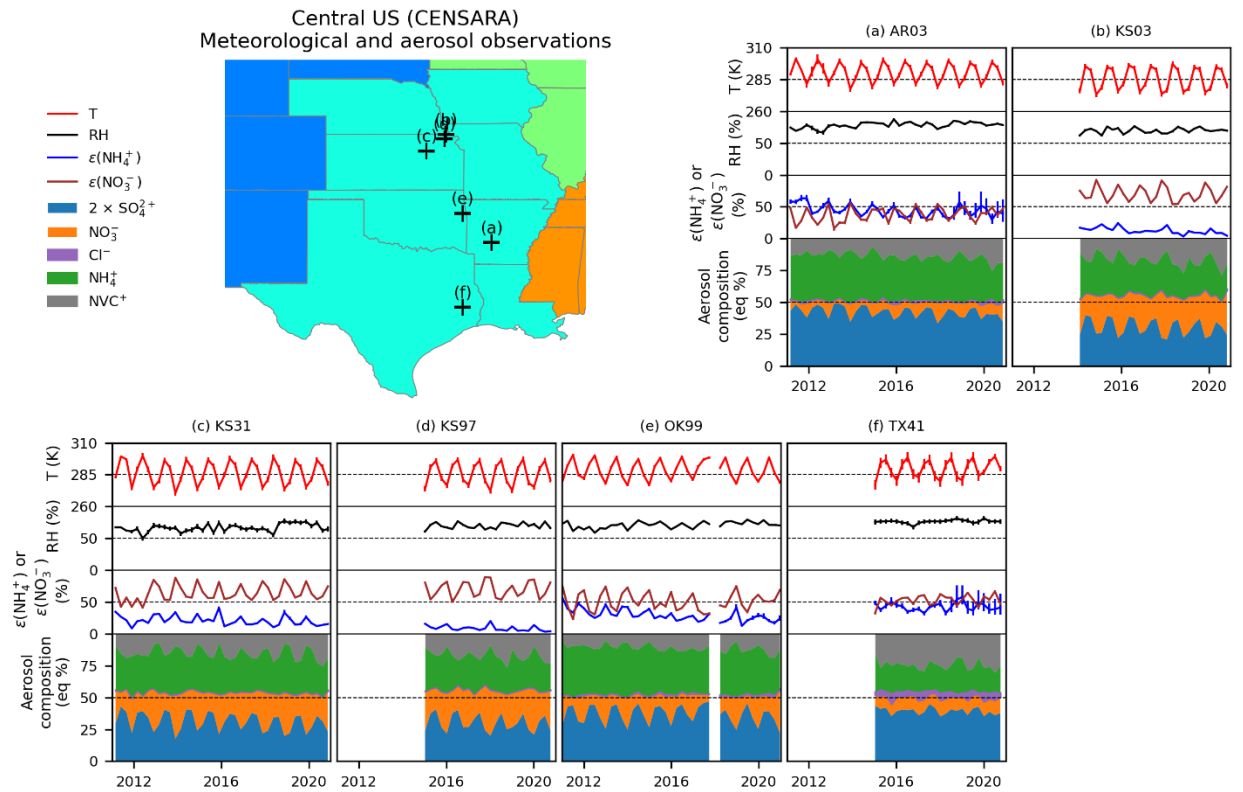

**Supplementary Figure 14.** Same as Supplementary Fig. 13 but for the Central US (CENSARA). Lines and bars in the top panels represent the mean values and the 95% CI (as the 2.5<sup>th</sup> to the 97.5<sup>th</sup> percentiles) of the corresponding variables derived from 1000 Monte Carlo simulations. The base map is obtained from Natural Earth.

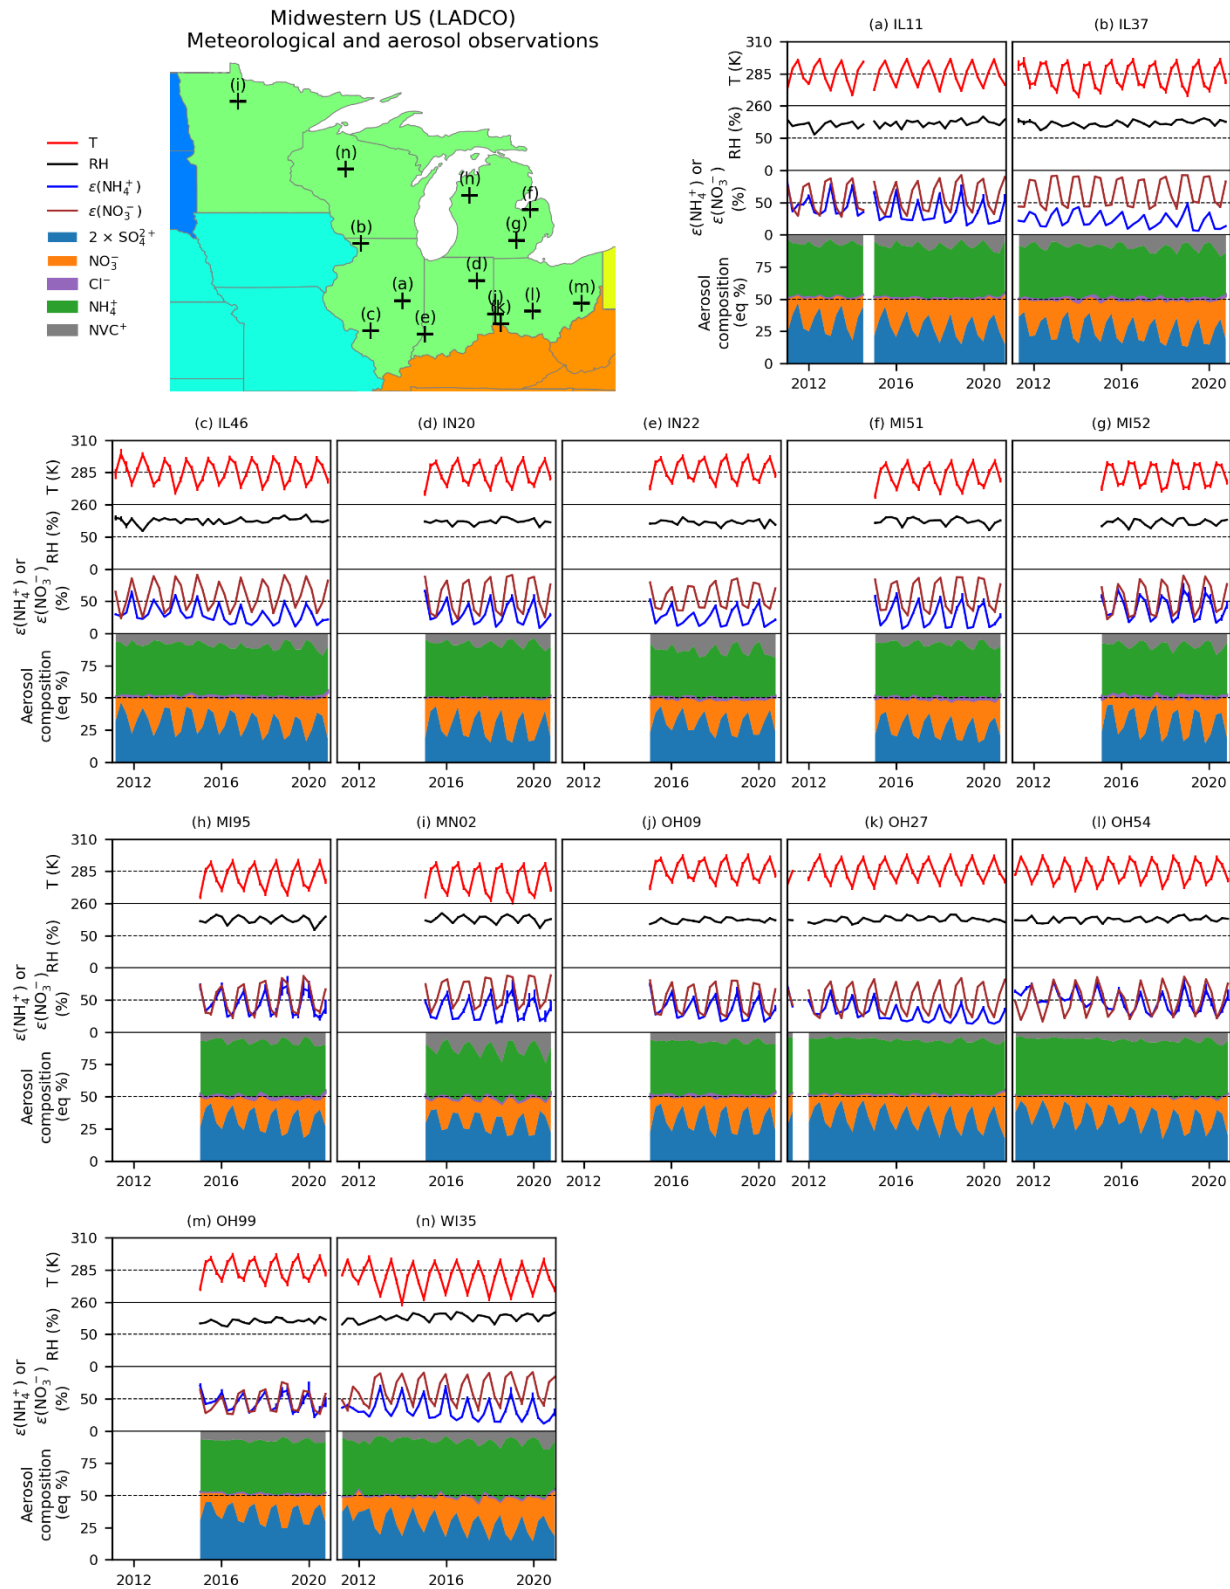

**Supplementary Figure 15.** Same as Supplementary Fig. 13 but for the Midwestern US (LADCO). Lines and bars in the top panels represent the mean values and the 95% CI (as the 2.5<sup>th</sup> to the 97.5<sup>th</sup> percentiles) of the corresponding variables derived from 1000 Monte Carlo simulations. The base map is obtained from Natural Earth.

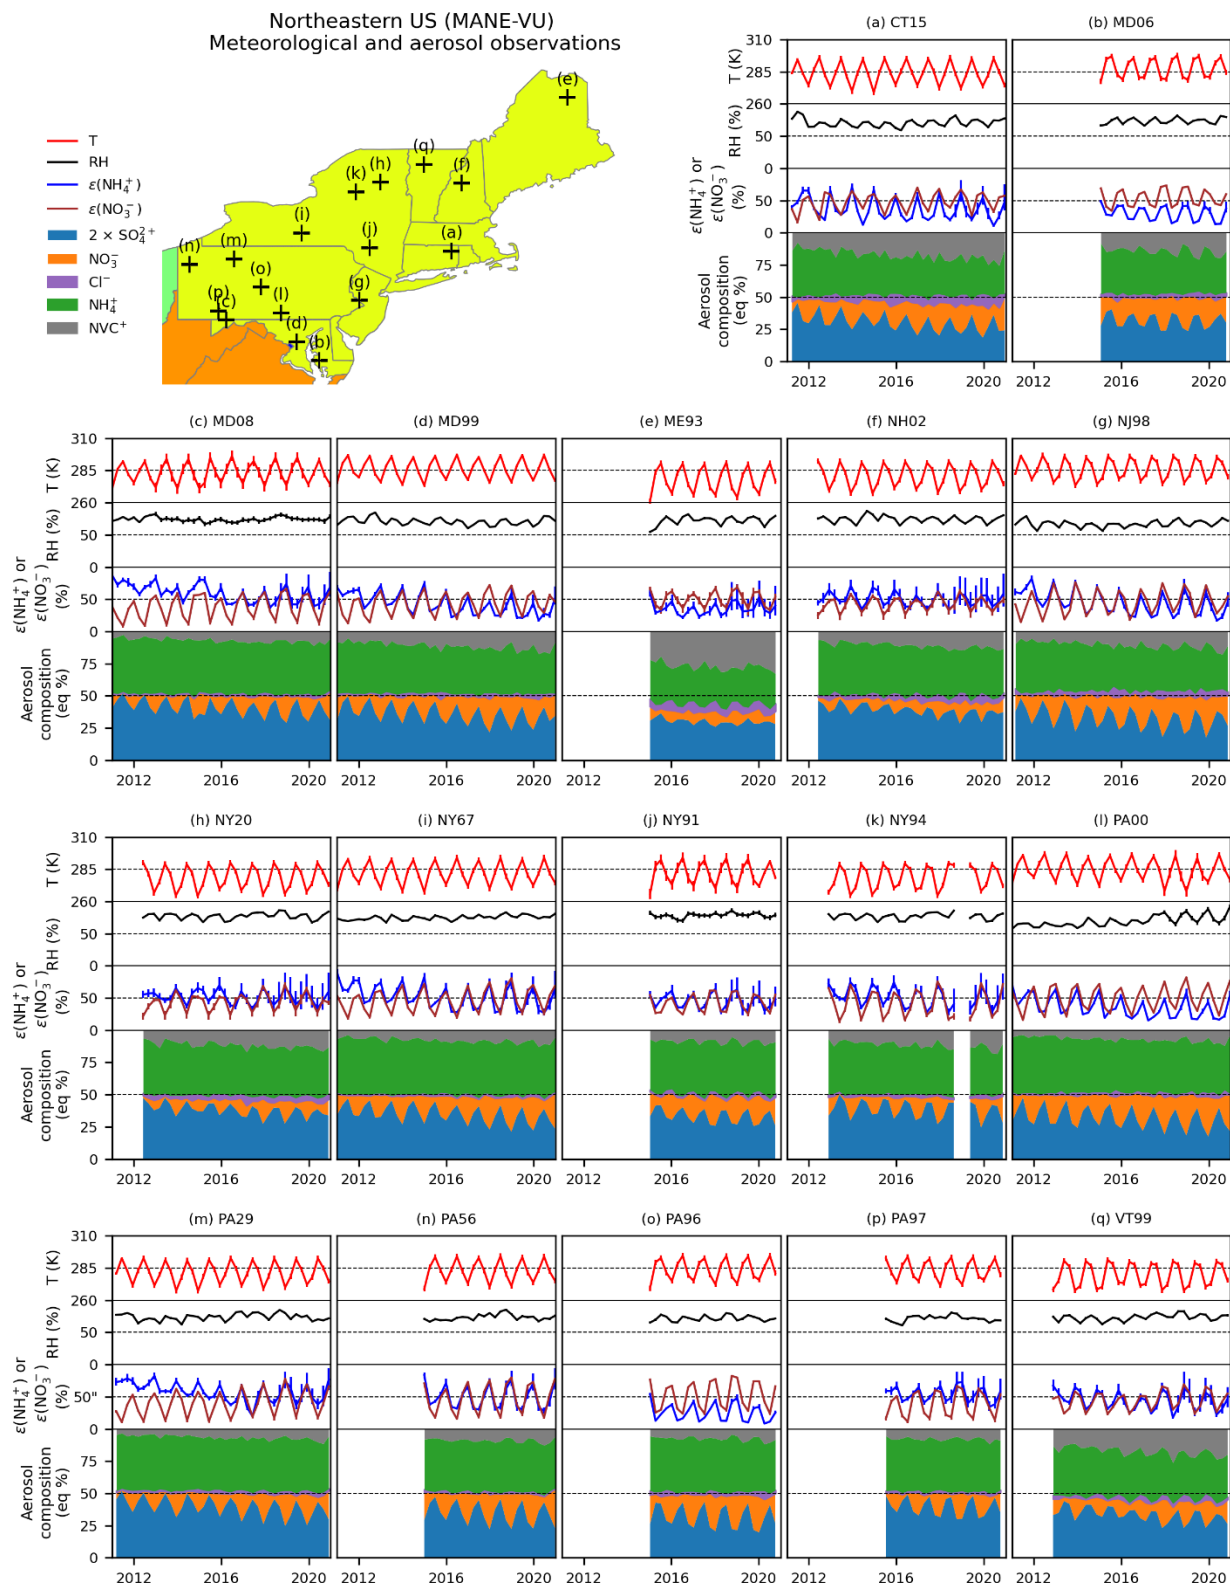

**Supplementary Figure 16.** Same as Supplementary Fig. 13 but for the Northeastern US (MANE-VU). Lines and bars in the top panels represent the mean values and the 95% CI (as the 2.5<sup>th</sup> to the 97.5<sup>th</sup> percentiles) of the corresponding variables derived from 1000 Monte Carlo simulations. The base map is obtained from Natural Earth.



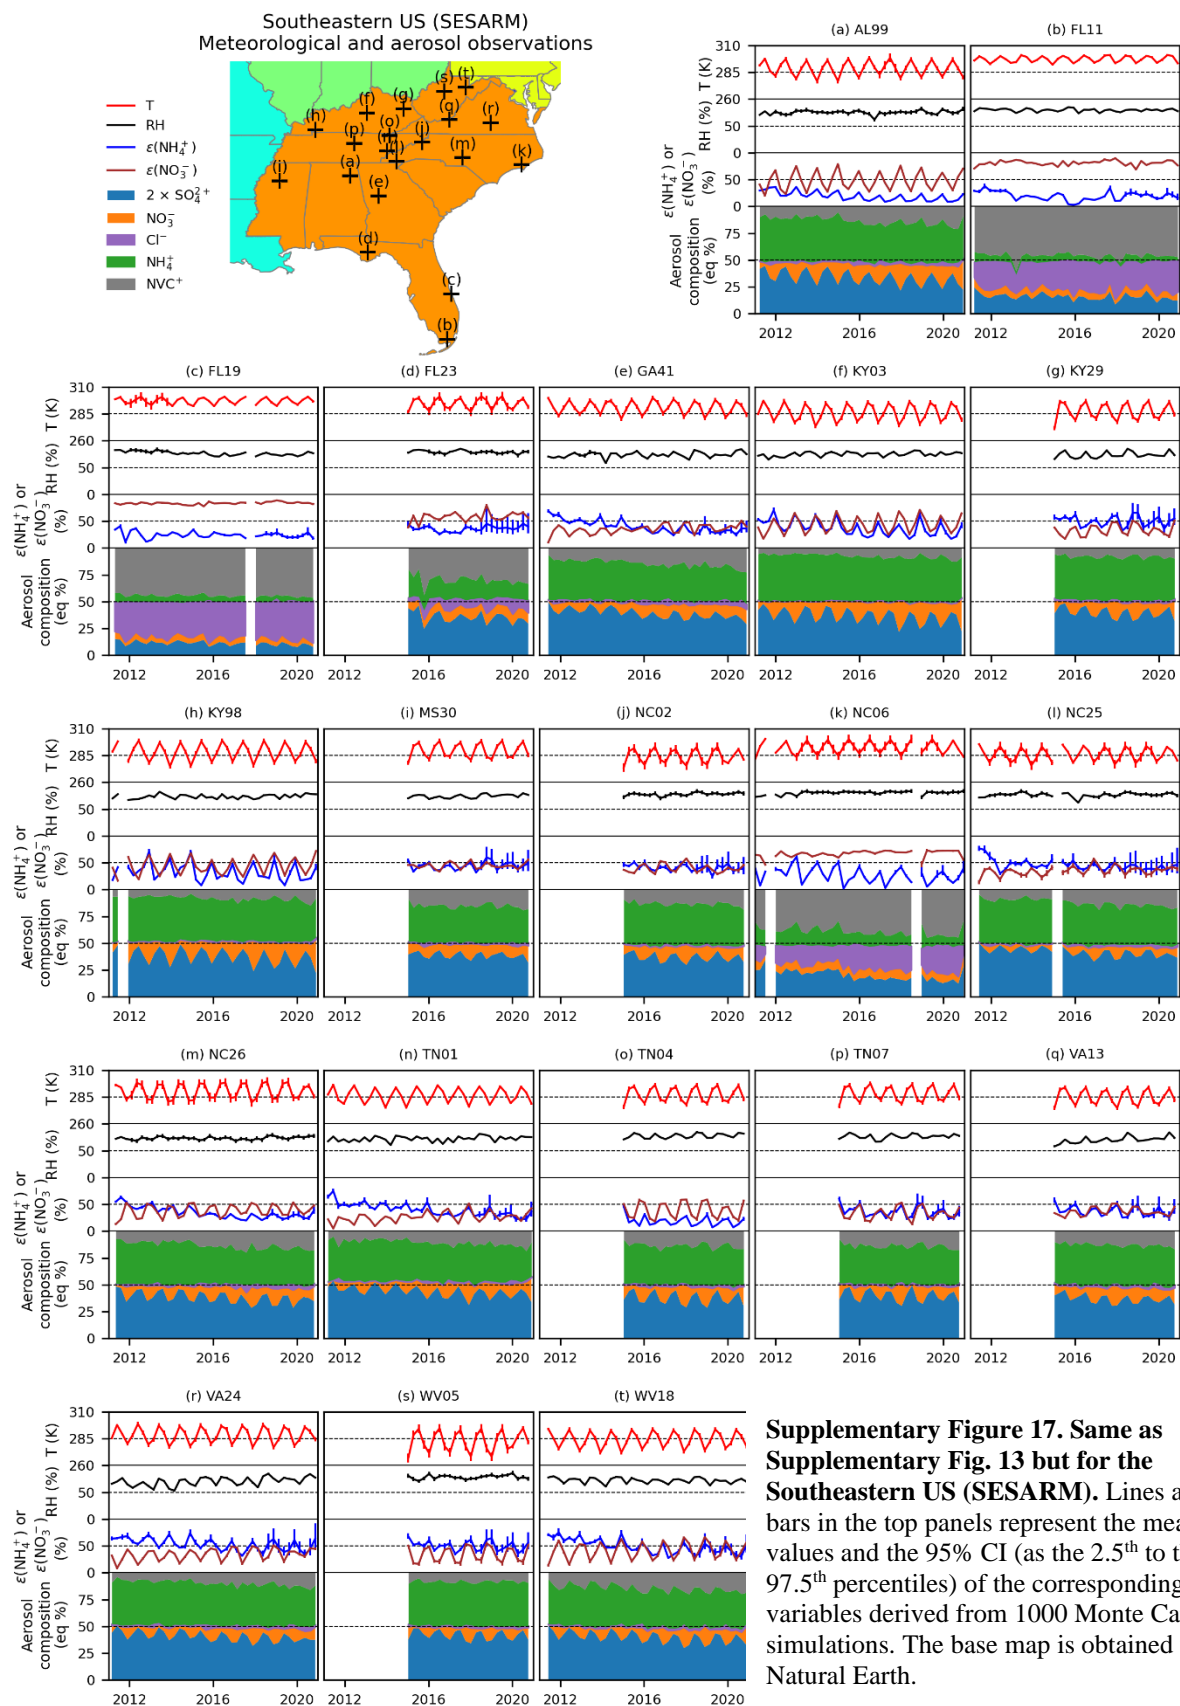

**Supplementary Figure 17. Same as Supplementary Fig. 13 but for the Southeastern US (SESARM).** Lines and bars in the top panels represent the mean values and the 95% CI (as the 2.5<sup>th</sup> to the 97.5<sup>th</sup> percentiles) of the corresponding variables derived from 1000 Monte Carlo simulations. The base map is obtained from Natural Earth.

Case 3: CASTNET&AMoN for chem (raw NVC)  
 CASTNET&ISD&NARR for met, TS=2w, dist<50 km, n=13813

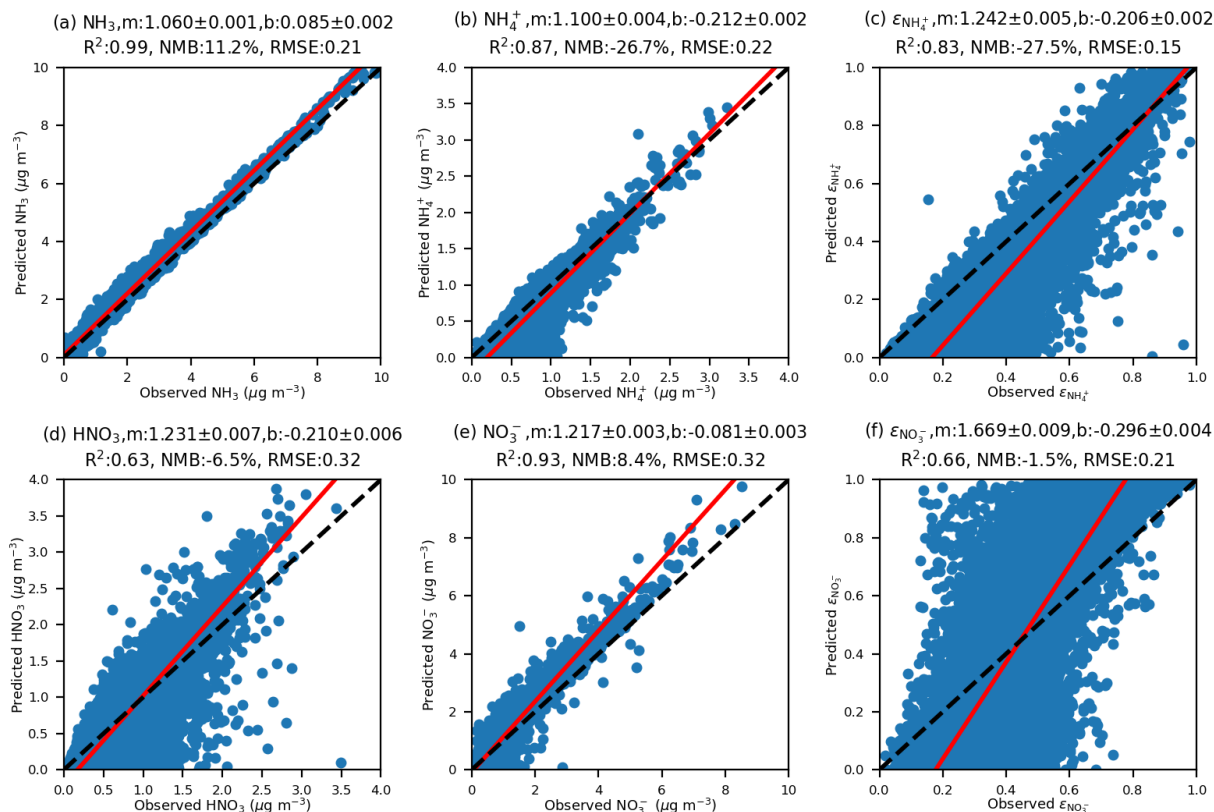

**Supplementary Figure 18. Observed and ISORROPIA-II (Case 3) simulated (a)  $c_{\text{NH}_3}$ , (b)  $c_{\text{NH}_4^+}$ , (c)  $c_{\text{HNO}_3}$  (d)  $c_{\text{NO}_3^-}$ , (e)  $\epsilon_{\text{NO}_3^-}$ , and (f)  $\epsilon_{\text{NH}_4^+}$ .** Inputs of the ISSORROPIA simulations are described in Supplementary Table 3. Red lines show orthogonal distance regression results (prediction =  $m \cdot \text{observation} + b$ ), and corresponding regression parameters and evaluation statistics (determination coefficient ( $R^2$ ), normalized mean bias (NMB), and root mean square error (RMSE)) are shown in panel titles. The slope and offset uncertainties are the 95% CI of the regression ( $\pm 1.96\text{SD}$ ). Black dashed lines show the 1:1 line. The number of samples is 13813 for all panels.

Case 4: CASTNET&AMoN for chem (raw NVC)  
 CASTNET&ISD&NARR for met, TS=3h, dist<50 km, n=13813

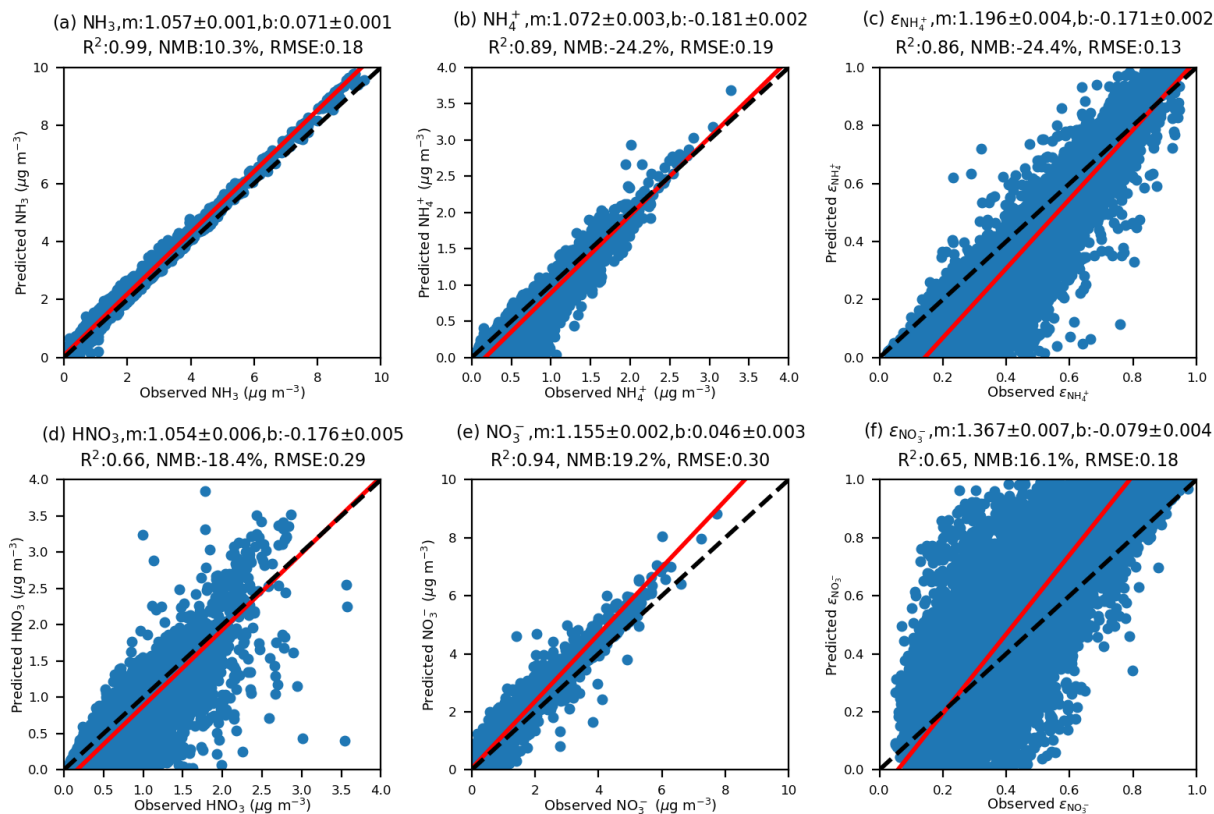

Supplementary Figure 19. Same as Supplementary Fig. 18 but for Case 4. The slope and offset uncertainties are the 95% CI of the regression ( $\pm 1.96\text{SD}$ ). Black dashed lines show the 1:1 line. The number of samples is 13813 for all panels.

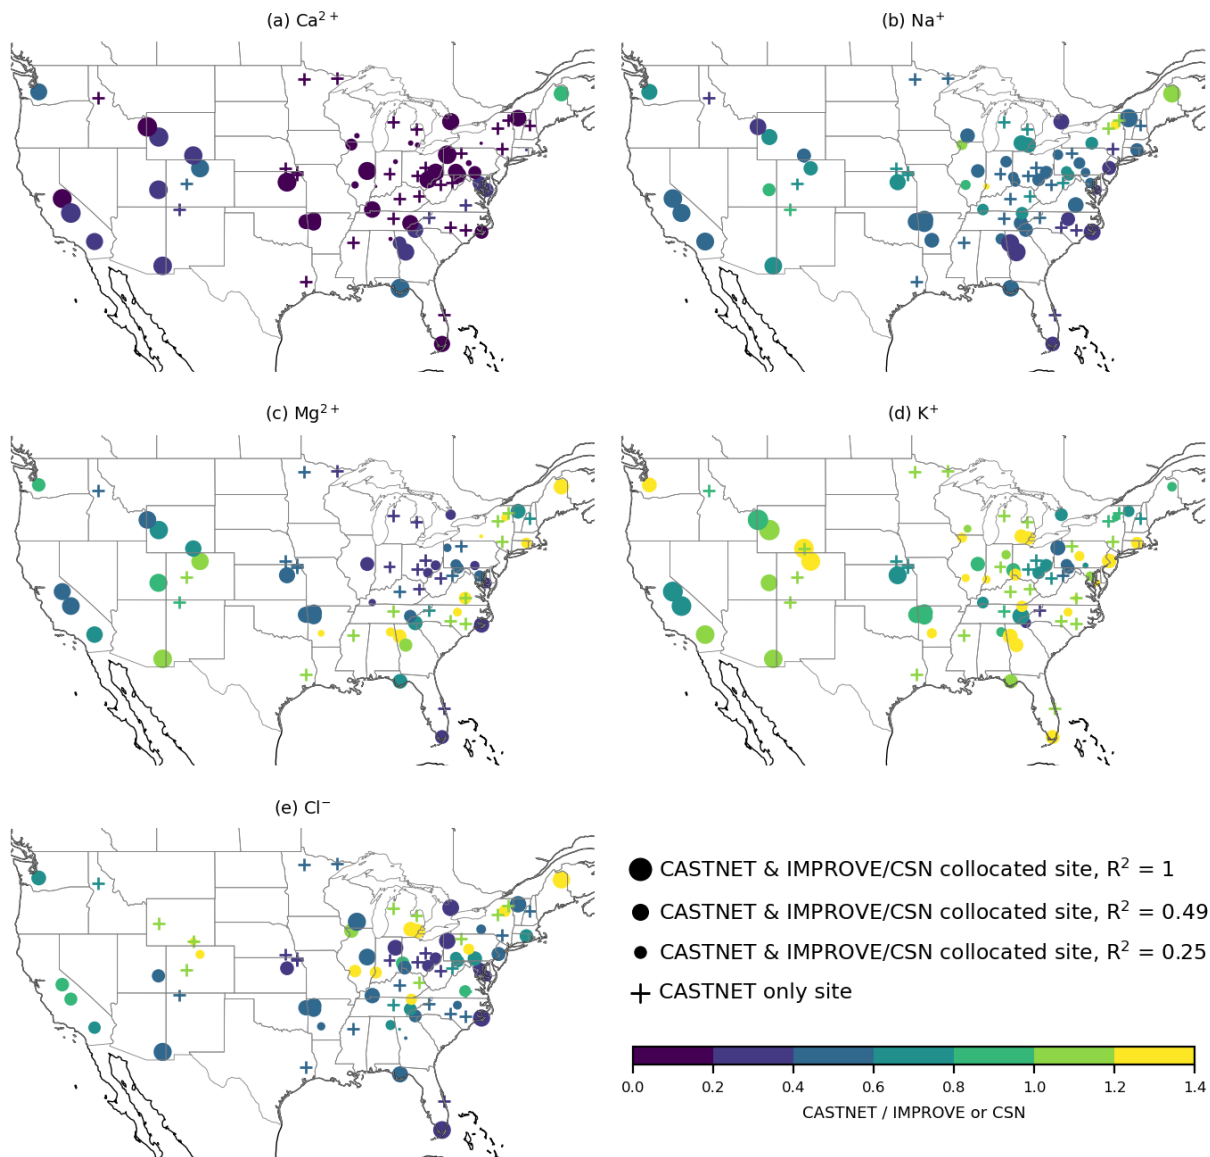

**Supplementary Figure 20. Ratios of CASTNET and IMPROVE/EPA CSN  $\text{NVC}$  and  $\text{Cl}^{-}$  observations (circles) and interpolated values for sites without IMPROVE/EPA CSN sites (crosses). Sizes of the circle represent the determination coefficient ( $R^2$ ). The base map is obtained from Natural Earth.**

Case 5: CASTNET&AMoN for chem (scaled NVC)  
 CASTNET&ISD&NARR for met, TS=2w, dist<50 km, n=13813

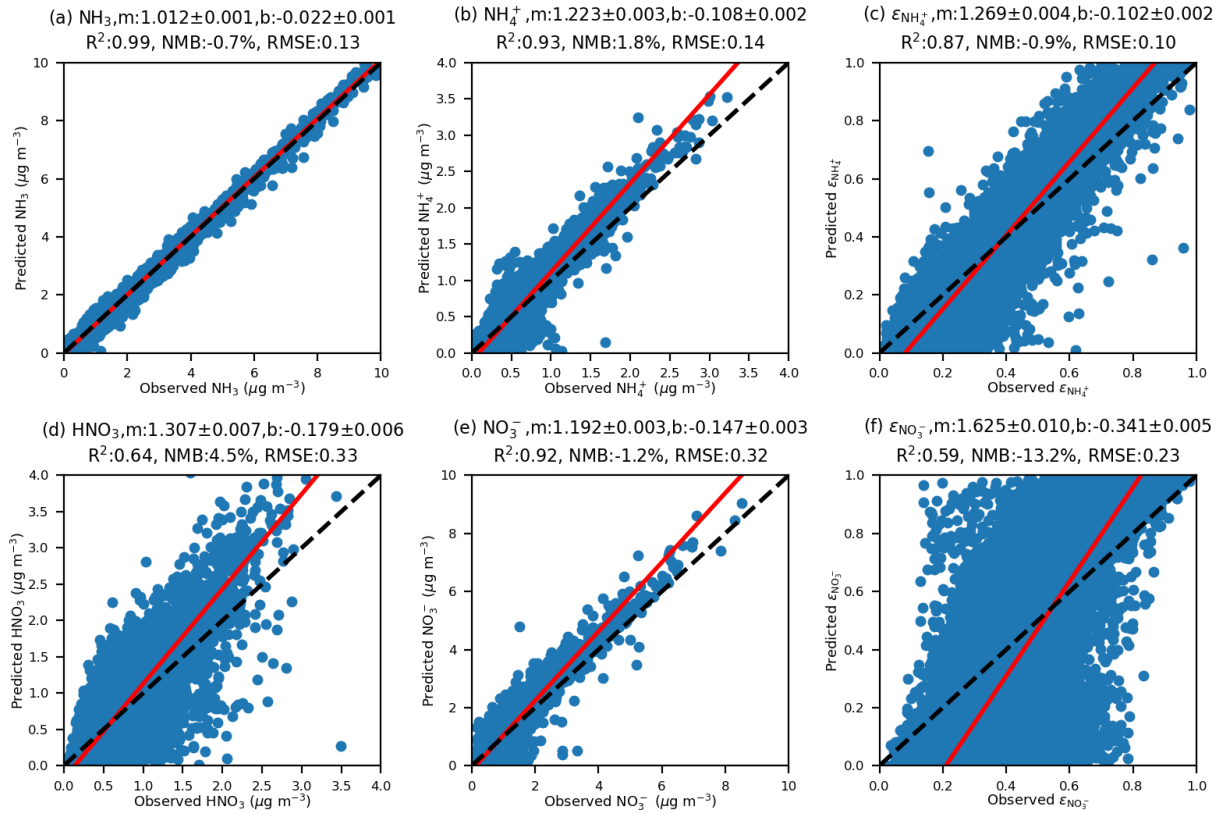

Supplementary Figure 21. Same as Supplementary Fig. 18 but for Case 5. The slope and offset uncertainties are the 95% CI of the regression ( $\pm 1.96\text{SD}$ ). Black dashed lines show the 1:1 line. The number of samples is 13813 for all panels.

Case 6: CASTNET&AMoN for chem (scaled NVC, HPBL diel pattern)  
 CASTNET&ISD&NARR for met, TS=3h, dist<50 km, n=13813

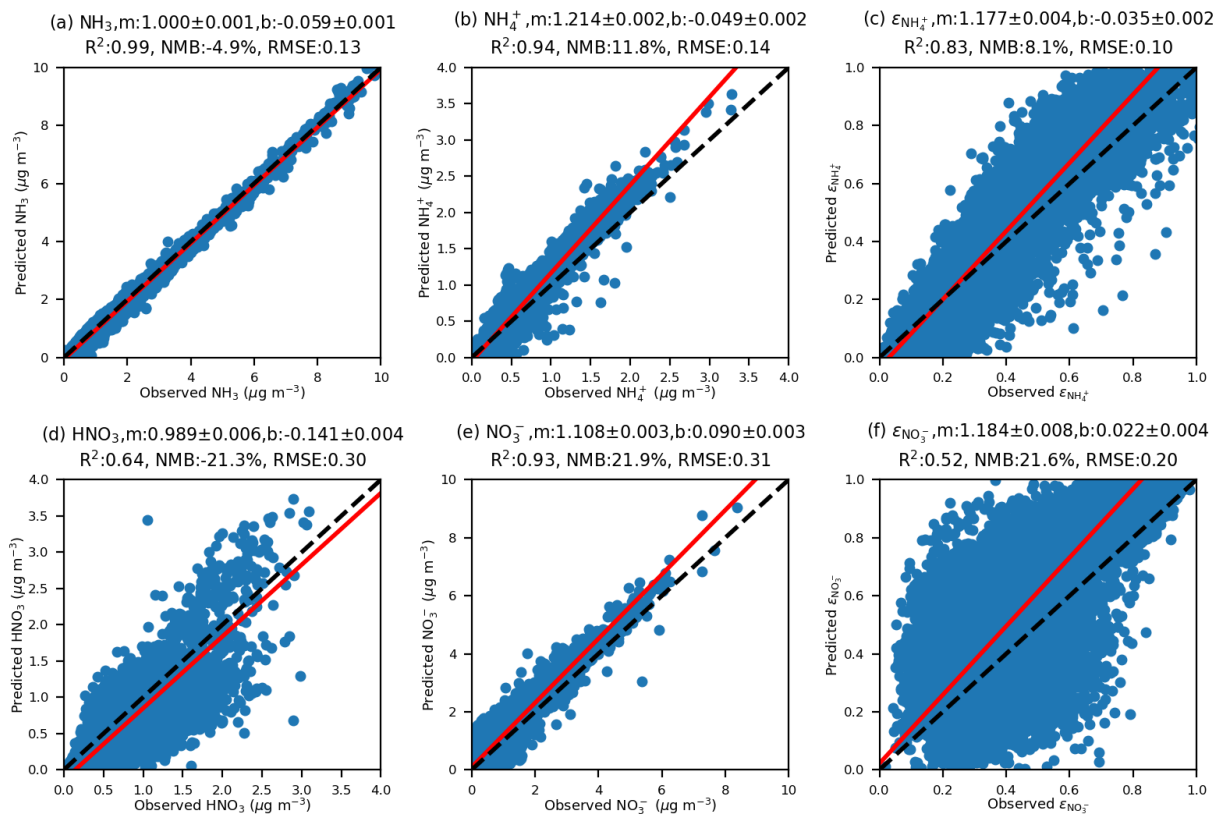

**Supplementary Figure 22.** Same as Supplementary Fig. 18 but for Case 6. The slope and offset uncertainties are the 95% CI of the regression ( $\pm 1.96\text{SD}$ ). Black dashed lines show the 1:1 line. The number of samples is 13813 for all panels.

Case 7: CASTNET&AMoN for chem (scaled NVC,  $\text{NH}_4^T$  diel pattern)  
 CASTNET&ISD&NARR for met, TS=3h, dist<50 km, n=13813

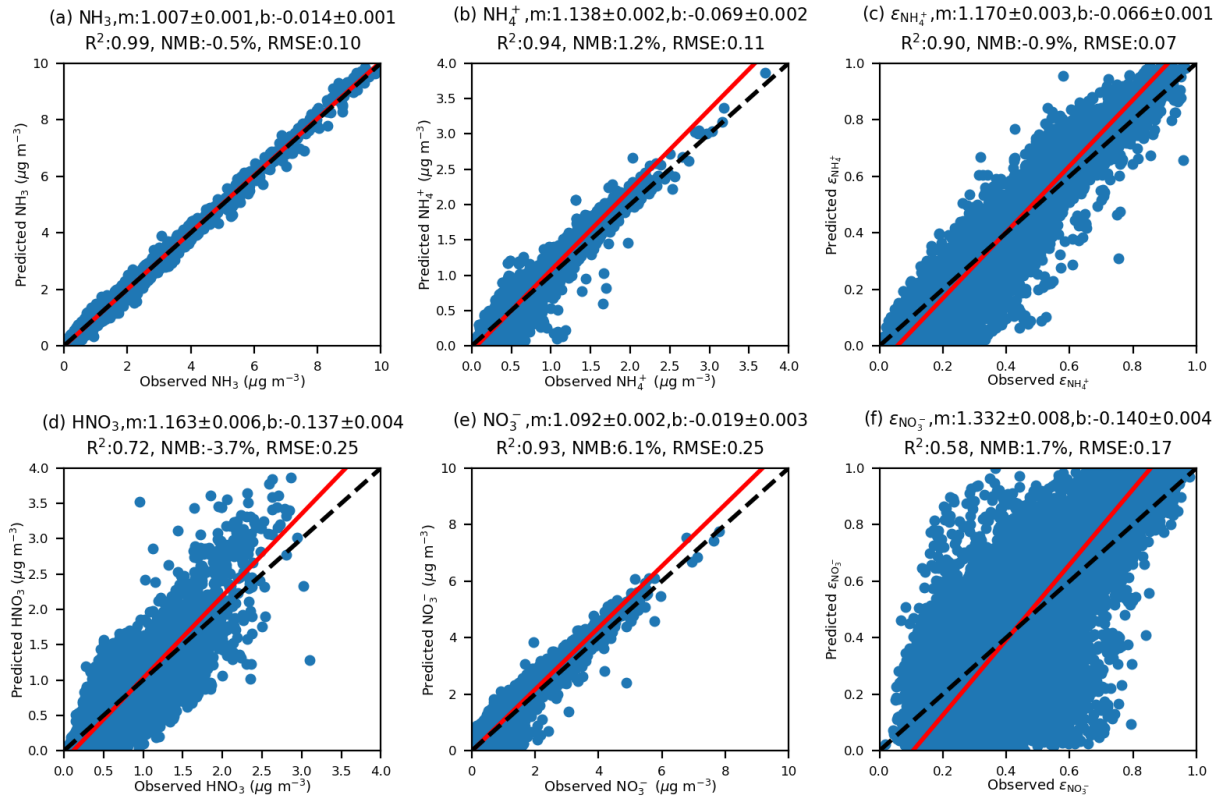

**Supplementary Figure 23.** Same as Supplementary Fig. 18 but for Case 7. The slope and offset uncertainties are the 95% CI of the regression ( $\pm 1.96\text{SD}$ ). Black dashed lines show the 1:1 line. The number of samples is 13813 for all panels.

Case 8: CASTNET&AMoN for chem (scaled NVC, increase  $\text{NH}_{3g}$  by 10%)  
 CASTNET&ISD&NARR for met, TS=3h, dist<50 km, n=13813

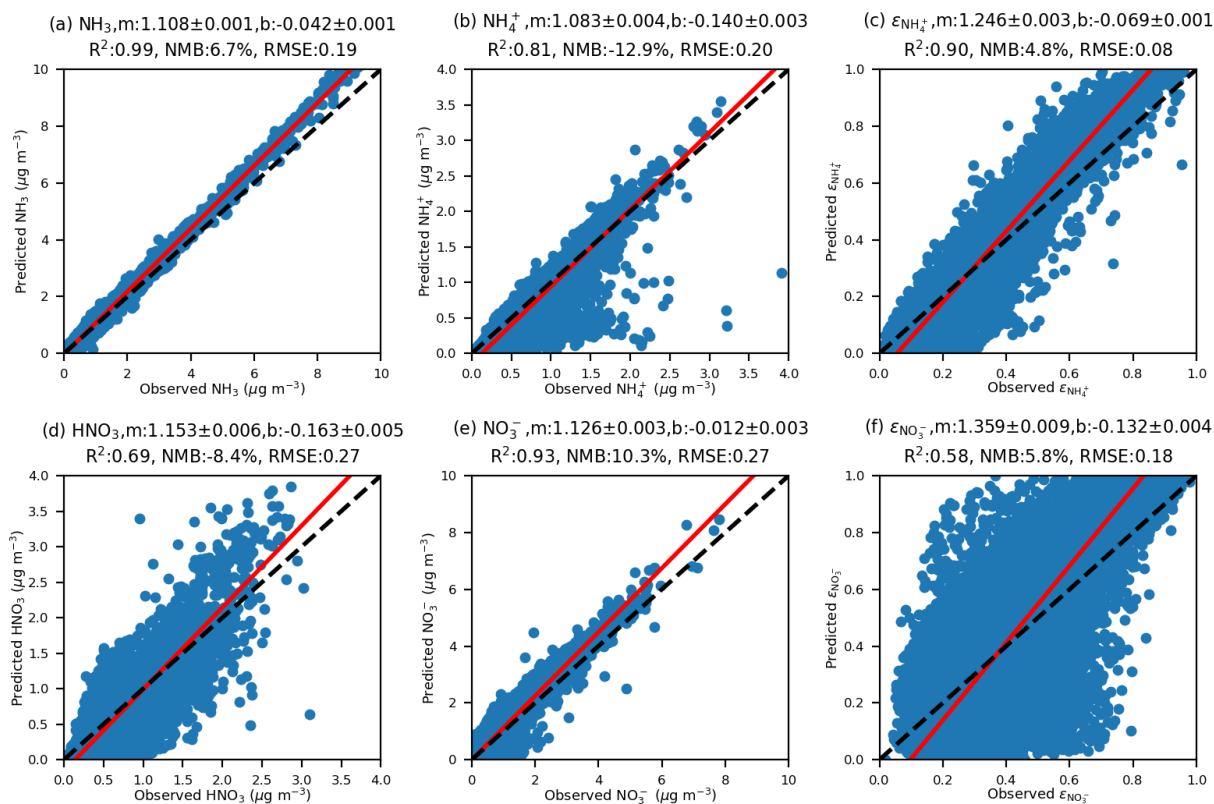

**Supplementary Figure 24.** Same as Supplementary Fig. 18 but for Case 8. The slope and offset uncertainties are the 95% CI of the regression ( $\pm 1.96\text{SD}$ ). Black dashed lines show the 1:1 line. The number of samples is 13813 for all panels.



Case 9: CASTNET&AMoN for chem (scaled NVC, decrease  $\epsilon_{\text{NO}_3^-}$  by 10%)  
 CASTNET&ISD&NARR for met, TS=3h, dist<50 km, n=13813

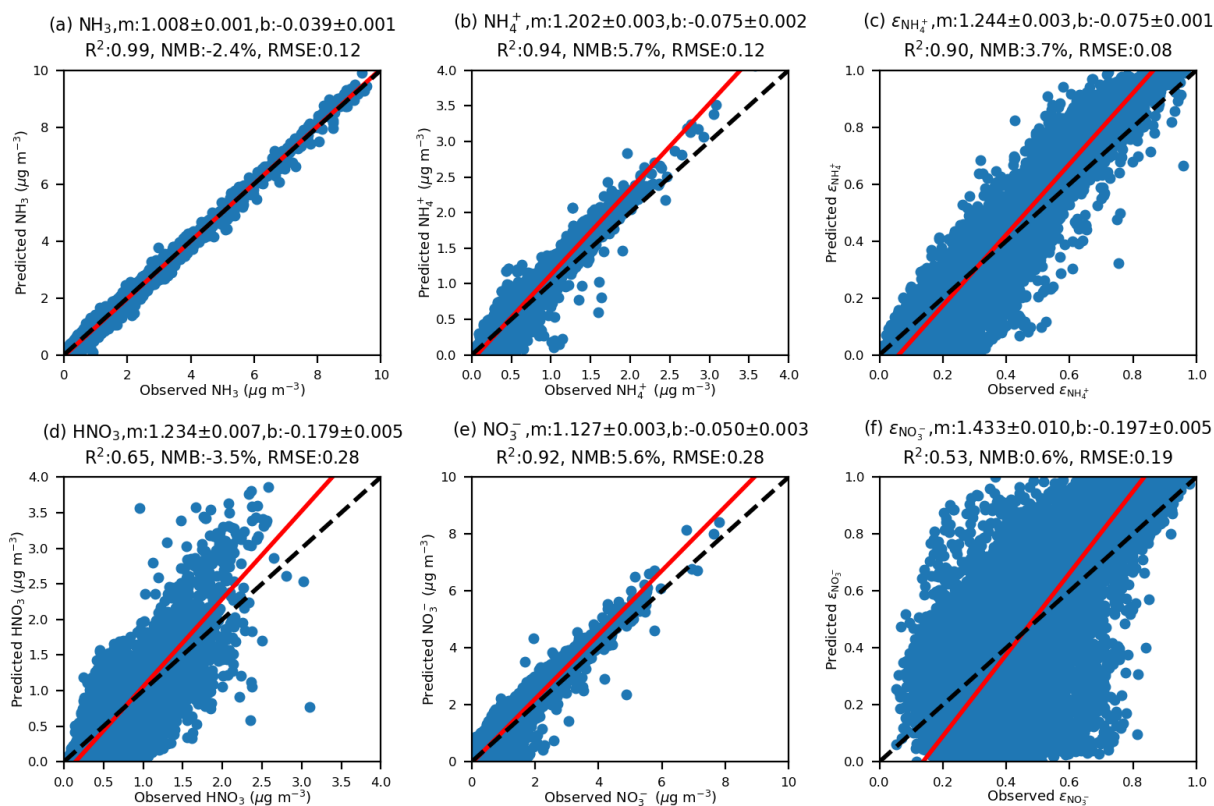

**Supplementary Figure 25.** Same as Supplementary Fig. 18 but for Case 9. The slope and offset uncertainties are the 95% CI of the regression ( $\pm 1.96\text{SD}$ ). Black dashed lines show the 1:1 line. The number of samples is 13813 for all panels.

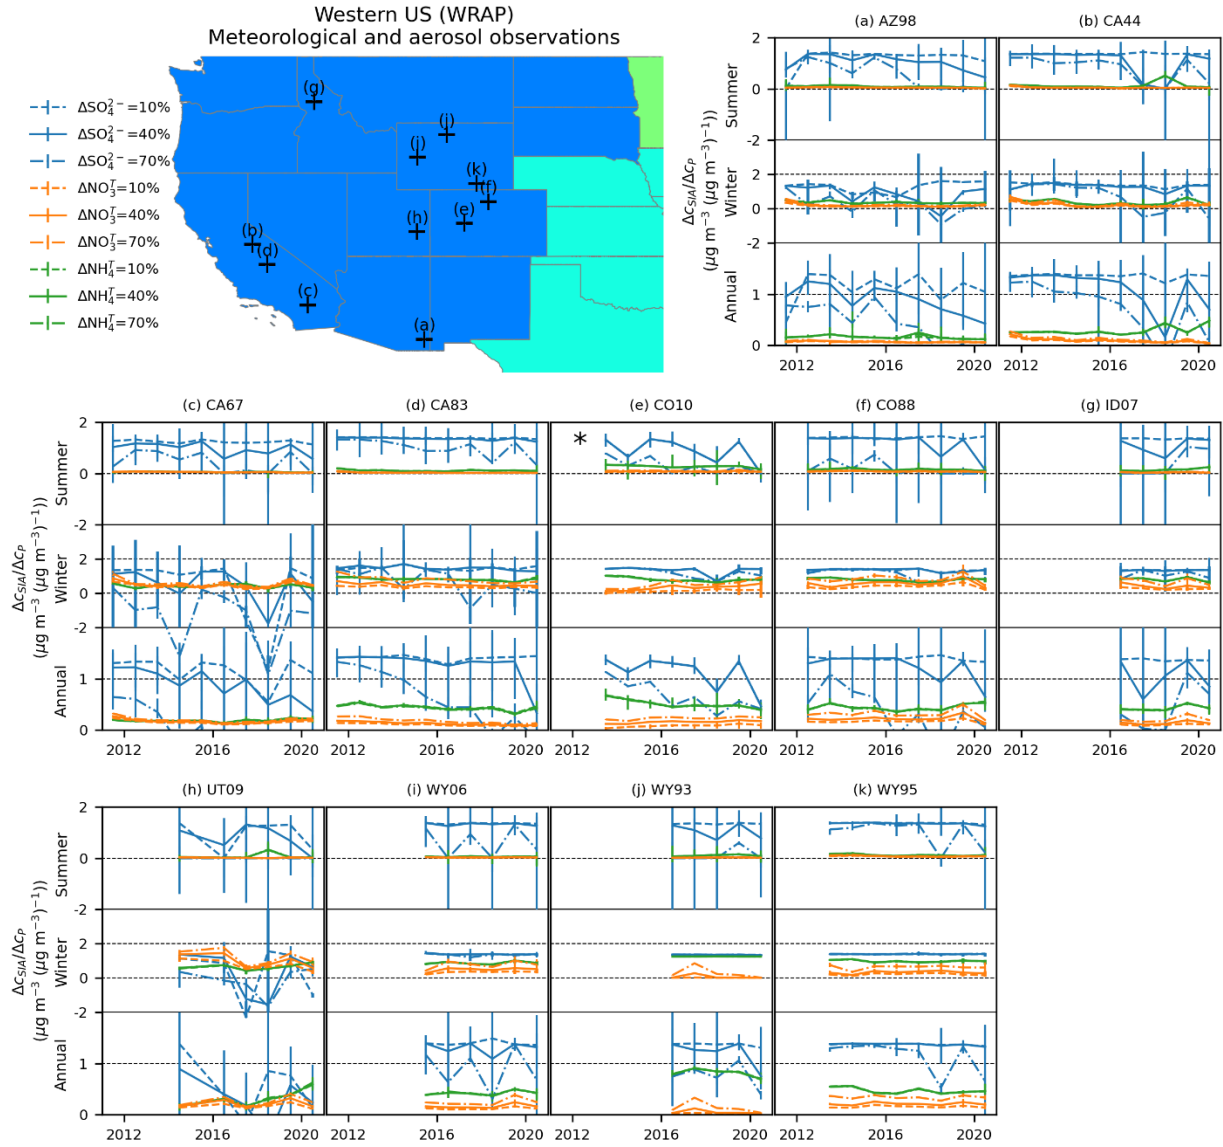

**Supplementary Figure 26. Simulated  $\Delta c_{\text{SIA}}/\Delta c_{\text{SO}_4^{2-}}$ ,  $\Delta c_{\text{SIA}}/\Delta c_{\text{NO}_3^-}$ , and  $\Delta c_{\text{SIA}}/\Delta c_{\text{NH}_4^+}$  from sites within the Western US (WRAP).** Lines and bars represent the mean values and the 95% CI (as the 2.5<sup>th</sup> to the 97.5<sup>th</sup> percentiles) of the corresponding variables derived from 500 Monte Carlo simulations. The base map is obtained from Natural Earth.

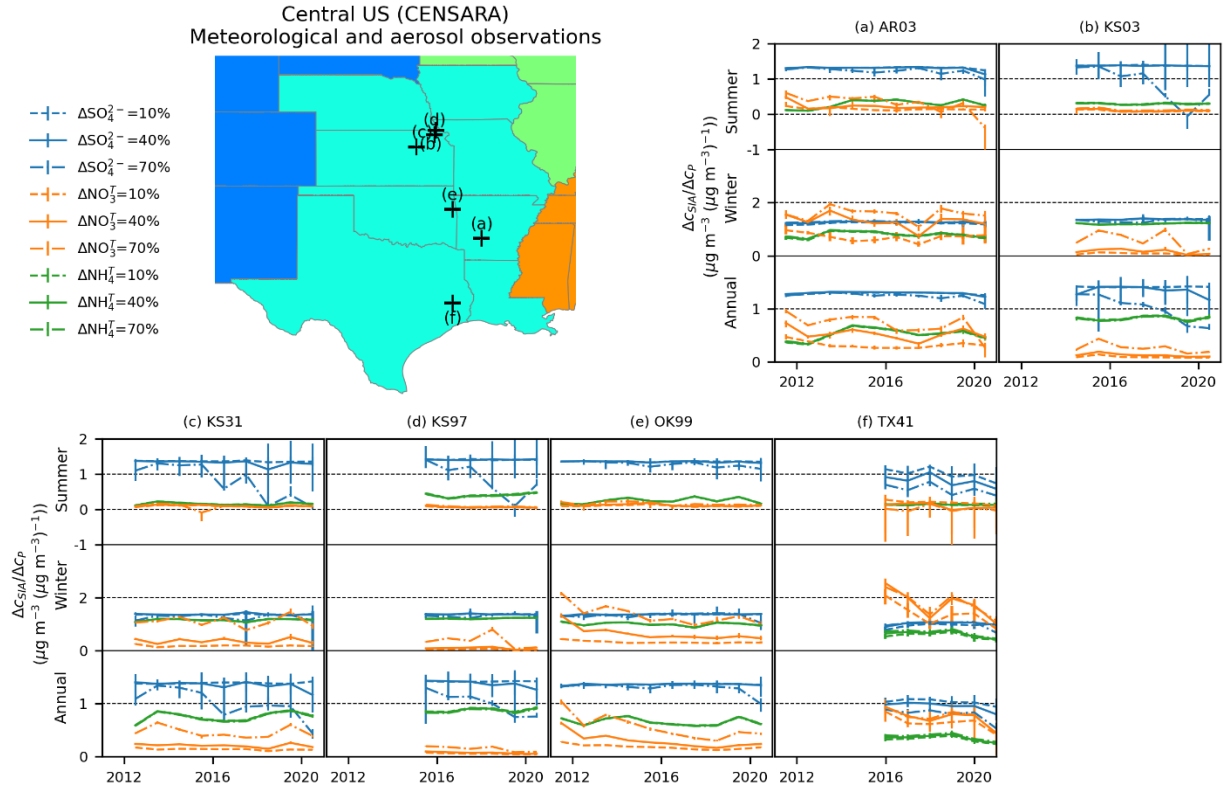

**Supplementary Figure 27.** Same as Supplementary Fig. 26 but for the Central US (CENSARA). Lines and bars represent the mean values and the 95<sup>th</sup> CI (as the 2.5<sup>th</sup> to the 97.5<sup>th</sup> percentiles) of the corresponding variables derived from 500 Monte Carlo simulations. The base map is obtained from Natural Earth.

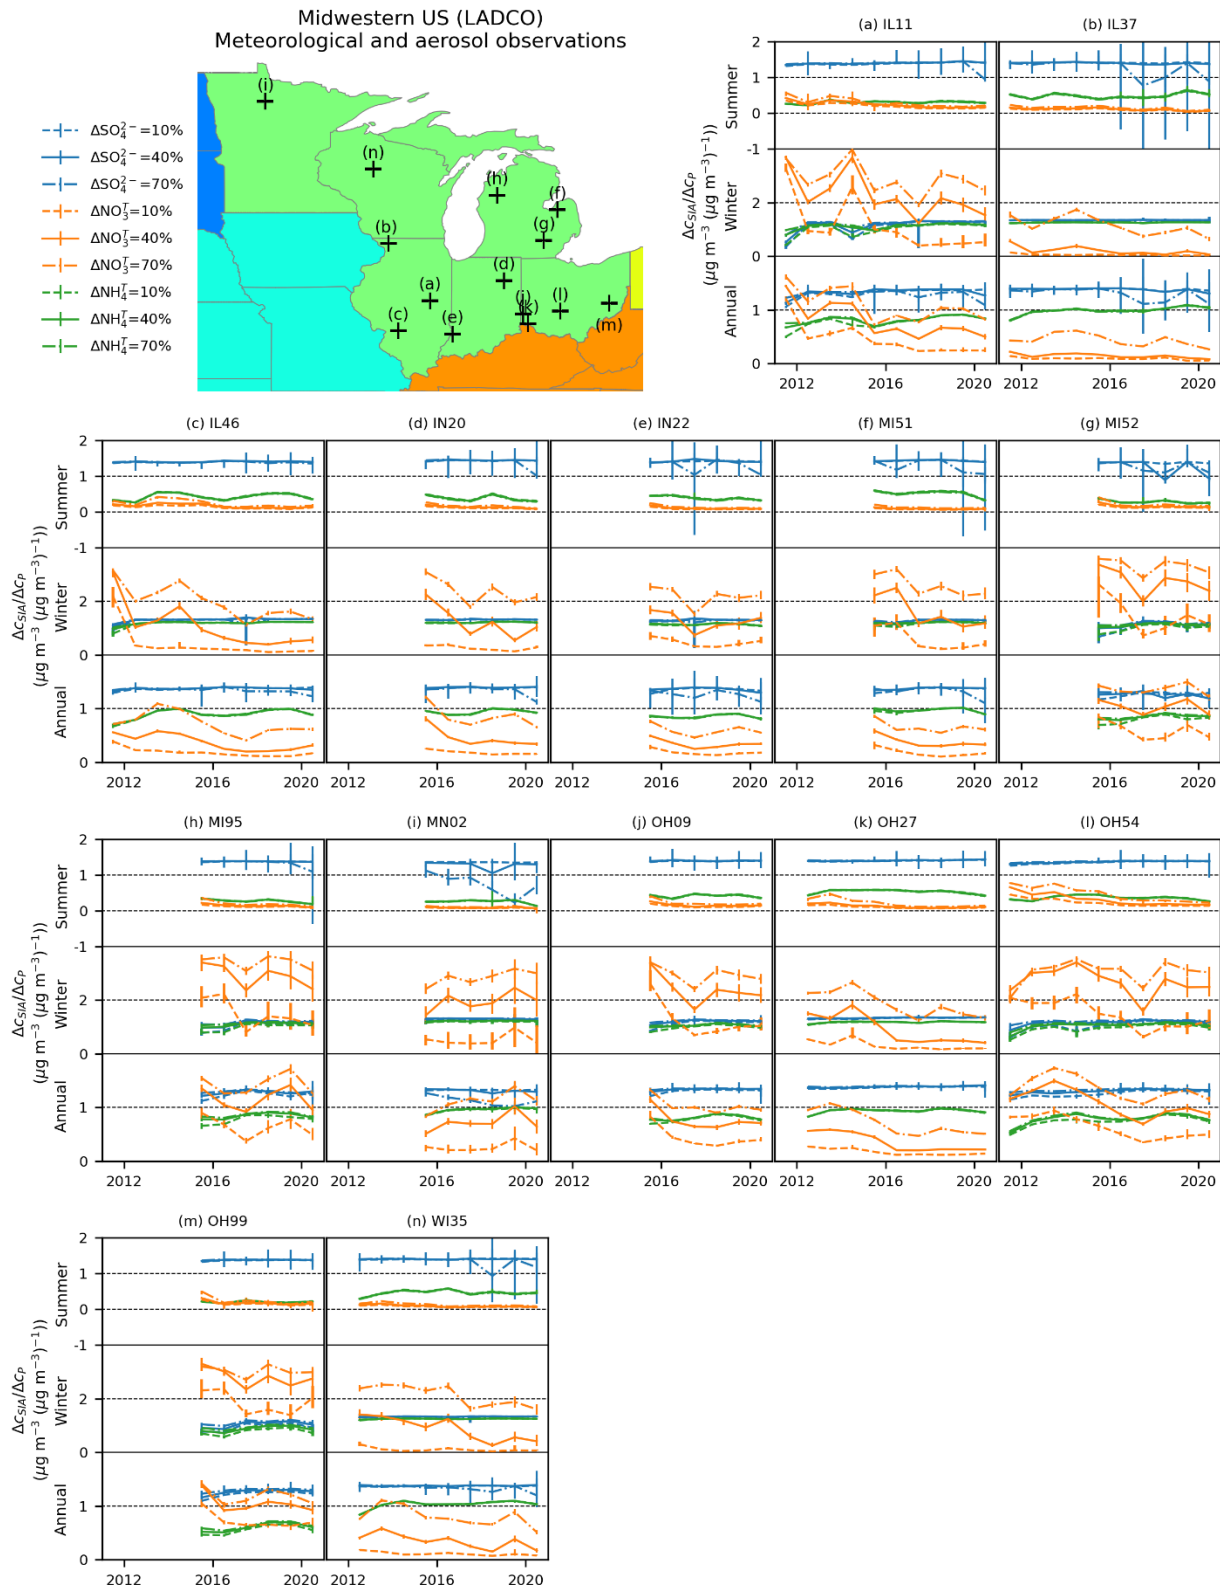

**Supplementary Figure 28.** Same as Supplementary Fig. 26 but for the Midwestern US (LADCO). Lines and bars represent the mean values and the 95% CI (as the 2.5<sup>th</sup> to the 97.5<sup>th</sup> percentiles) of the corresponding variables derived from 500 Monte Carlo simulations. The base map is obtained from Natural Earth.

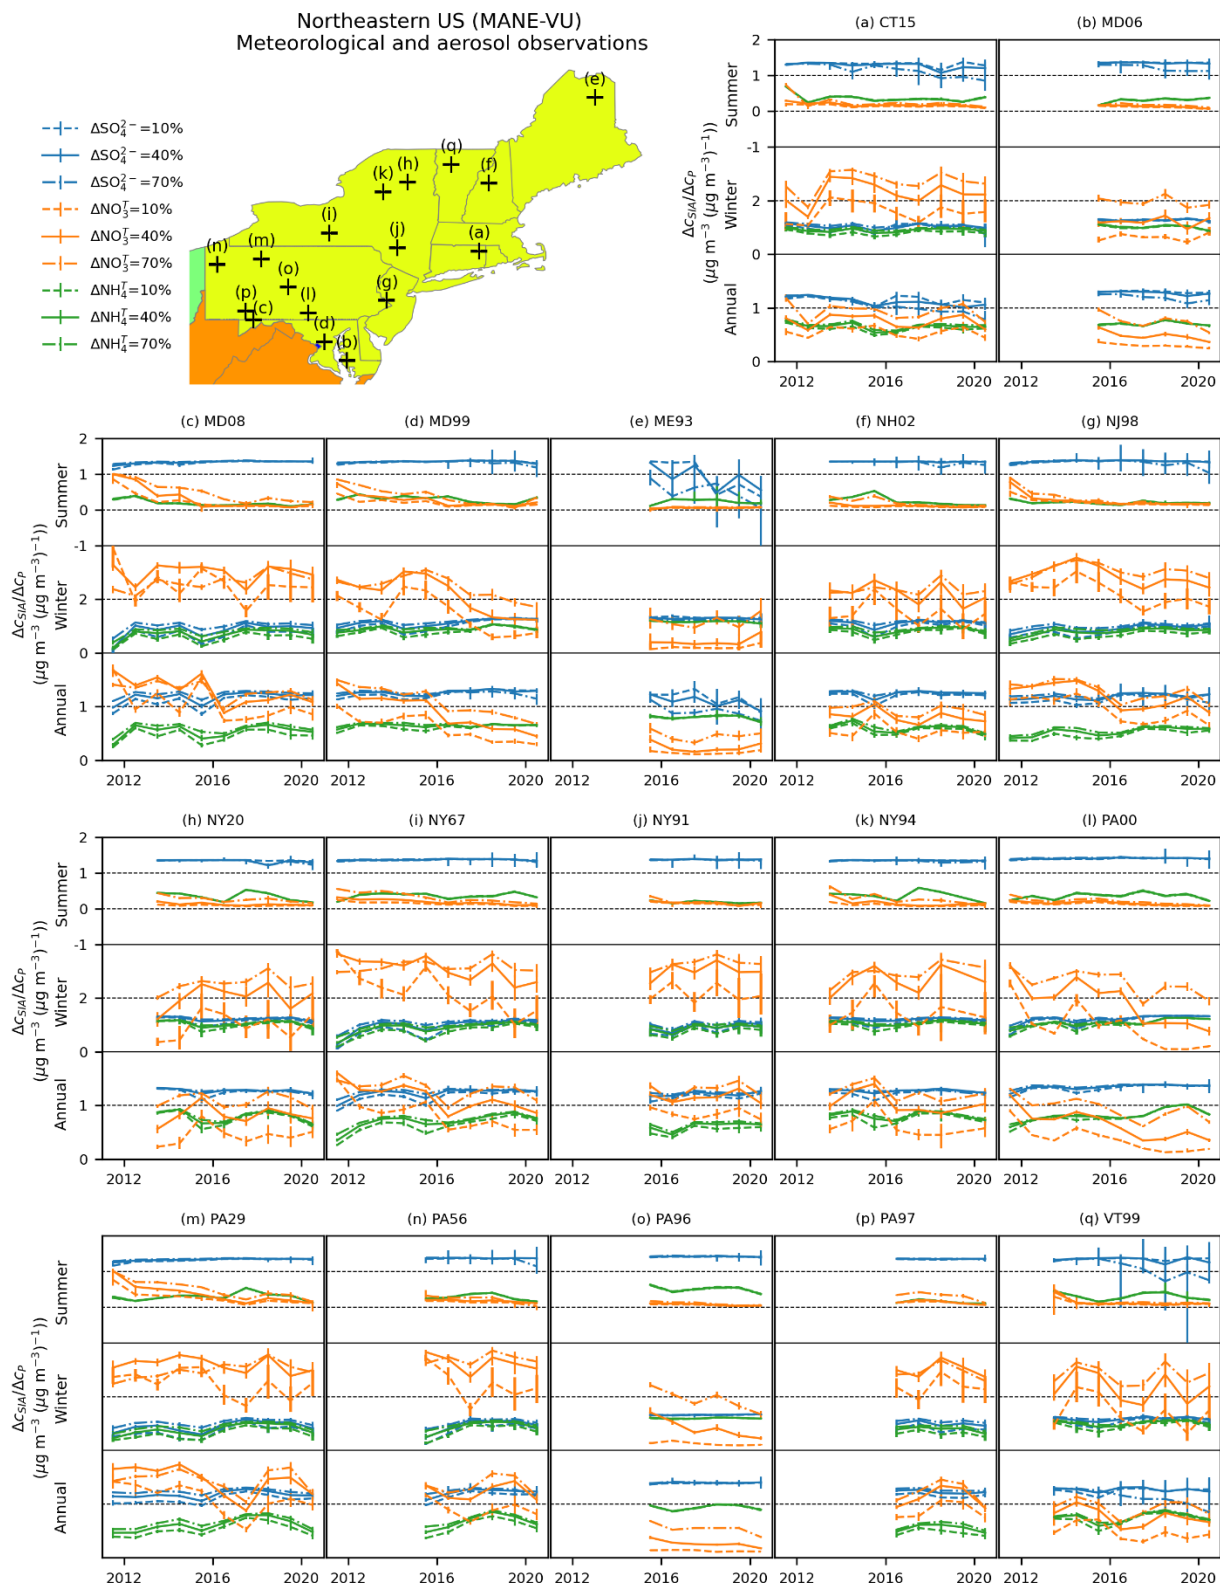

**Supplementary Figure 29.** Same as Supplementary Fig. 26 but for the Northeastern US (MANE-VU). Lines and bars represent the mean values and the 95% CI (as the 2.5<sup>th</sup> to the 97.5<sup>th</sup> percentiles) of the corresponding variables derived from 500 Monte Carlo simulations. The base map is obtained from Natural Earth.

Southeastern US (SESARM)  
 Meteorological and aerosol observations

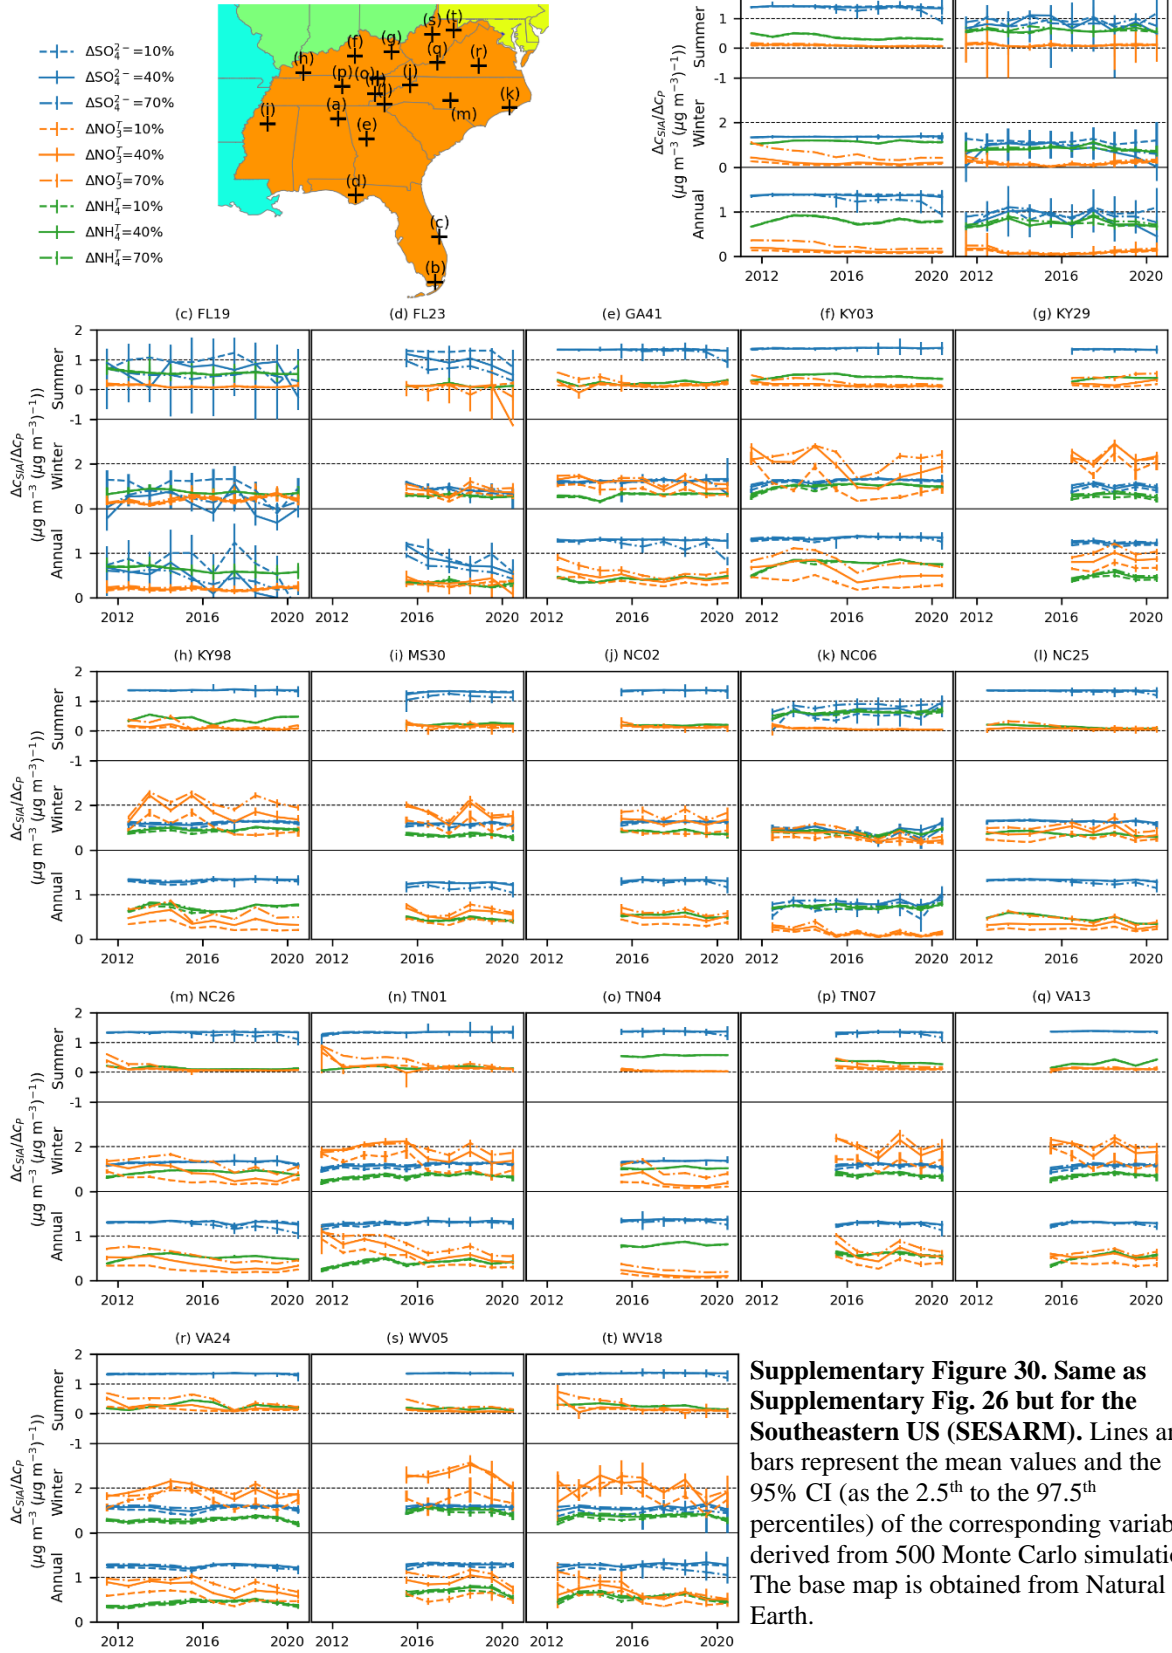

**Supplementary Figure 30.** Same as **Supplementary Fig. 26** but for the **Southeastern US (SESARM)**. Lines and bars represent the mean values and the 95% CI (as the 2.5<sup>th</sup> to the 97.5<sup>th</sup> percentiles) of the corresponding variables derived from 500 Monte Carlo simulations. The base map is obtained from Natural Earth.



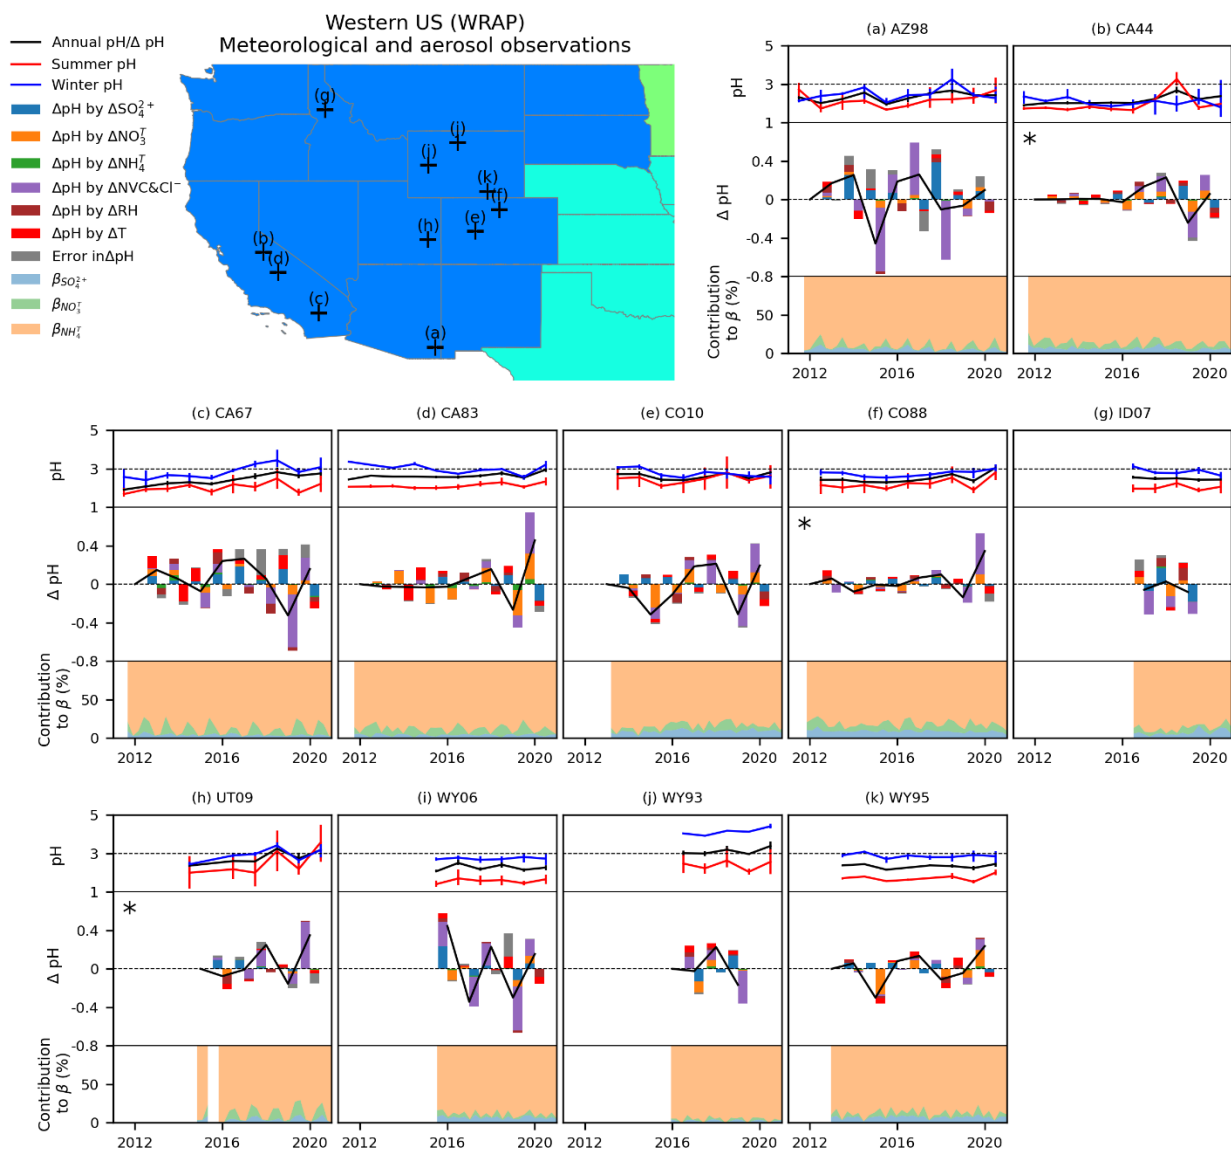

**Supplementary Figure 31. ISORROPIA-II Simulated aerosol acidity related properties from sites within the Western US (WRAP).** The top panels of each site plot show annual, summer, and winter pH, and lines and bars represent the mean values and the 95% CI (as the 2.5<sup>th</sup> to the 97.5<sup>th</sup> percentiles) derived from 1000 Monte Carlo simulations. The middle panels show  $\Delta\text{pH}$  caused by changes in  $\text{SO}_4^{2-}$ ,  $\text{NO}_3^T$ ,  $\text{NH}_4^T$ , non-volatile ions and  $\text{Cl}^-$ , relative humidity (RH), temperature, and errors of the multivariable Taylor series method. The bottom panels show buffering capacities of  $\text{SO}_4^{2-}$ ,  $\text{NO}_3^T$ , and  $\text{NH}_4^T$ . Vertical bars in the top panels are the 95% CI (as the 2.5<sup>th</sup> and the 97.5<sup>th</sup> percentiles) of the corresponding variables derived from 1000 Monte Carlo simulations. “\*” indicates that  $\Delta\text{pH}$  values are scaled by 0.5 to be fitted in the panel. The base map is obtained from Natural Earth.

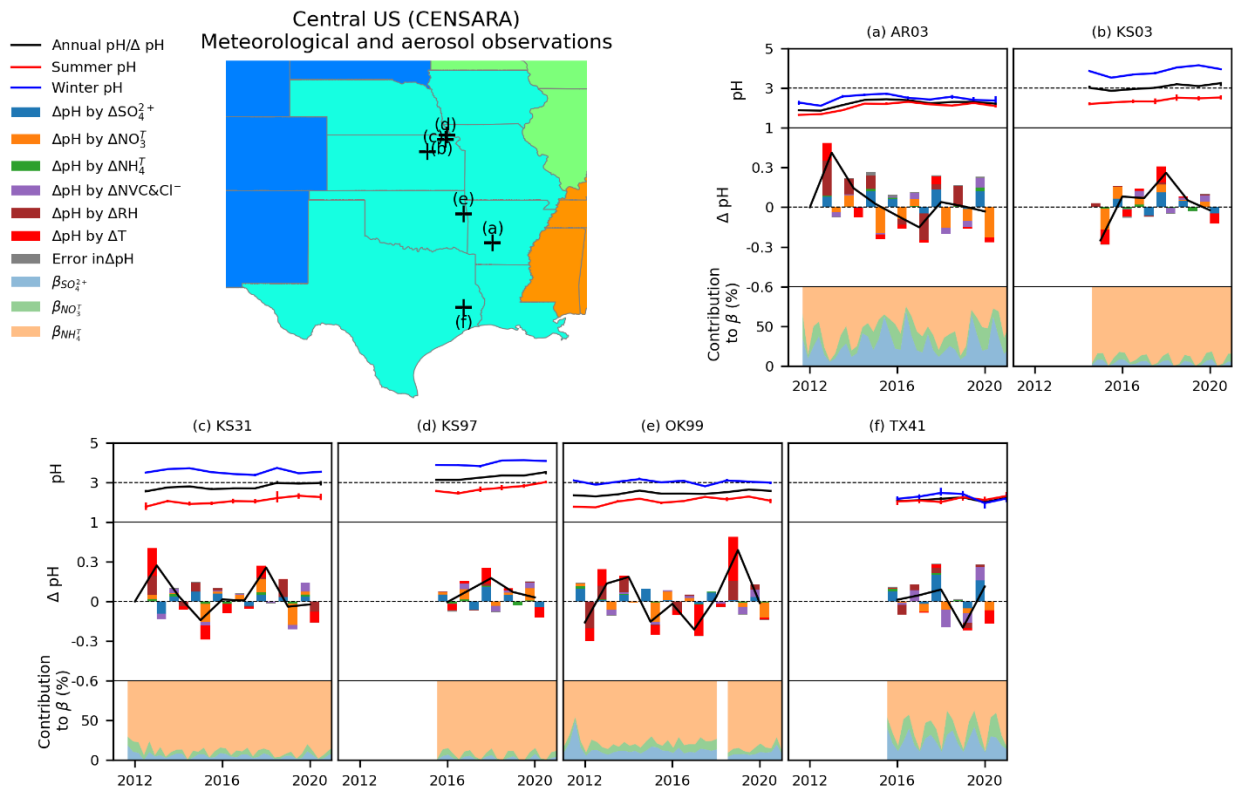

**Supplementary Figure 32. Same as Supplementary Fig. 31 but for the Central US (CENSARA).** The top panels of each site plot show annual, summer, and winter pH, and lines and bars represent the mean values and the 95% CI (as the 2.5<sup>th</sup> to the 97.5<sup>th</sup> percentiles) derived from 1000 Monte Carlo simulations. The base map is obtained from Natural Earth.



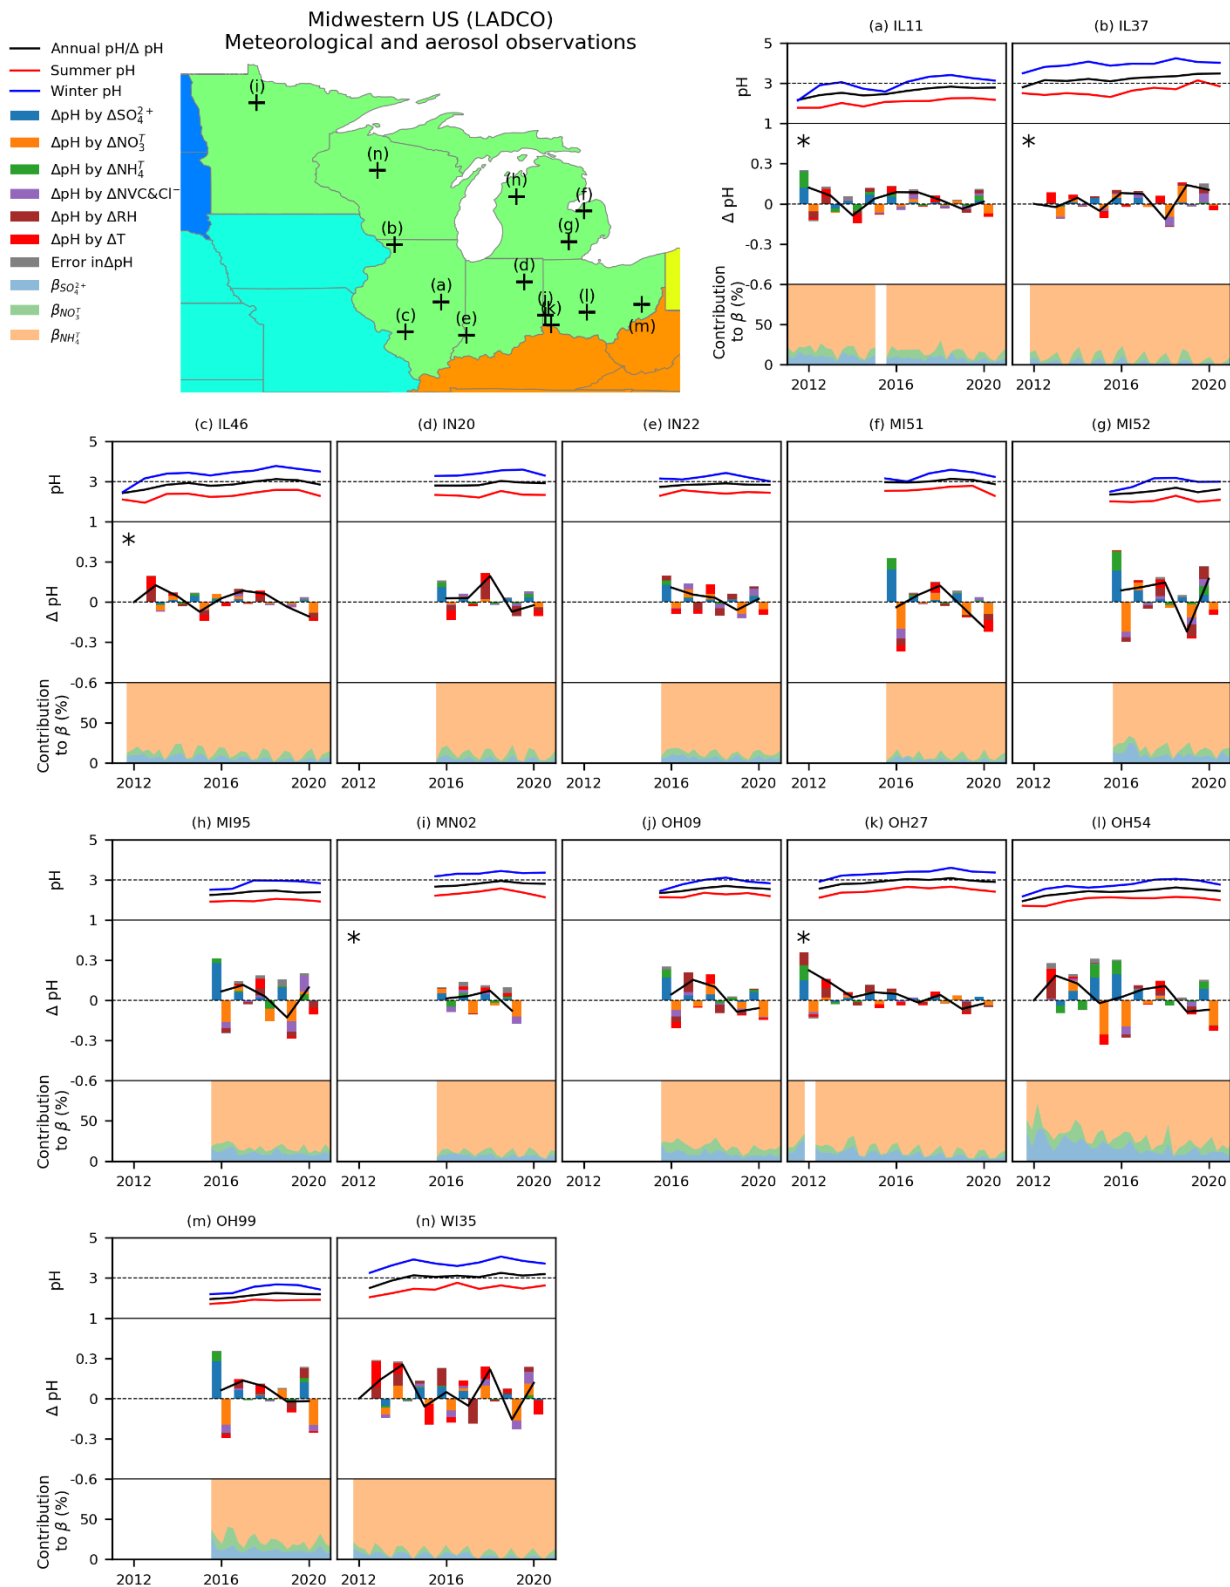

**Supplementary Figure 33.** Same as Supplementary Fig. 31 but for the Midwestern US (LADCO). The top panels of each site plot show annual, summer, and winter pH, and lines and bars represent the mean values and the 95% CI (as the 2.5<sup>th</sup> to the 97.5<sup>th</sup> percentiles) derived from 1000 Monte Carlo simulations. The base map is obtained from Natural Earth.

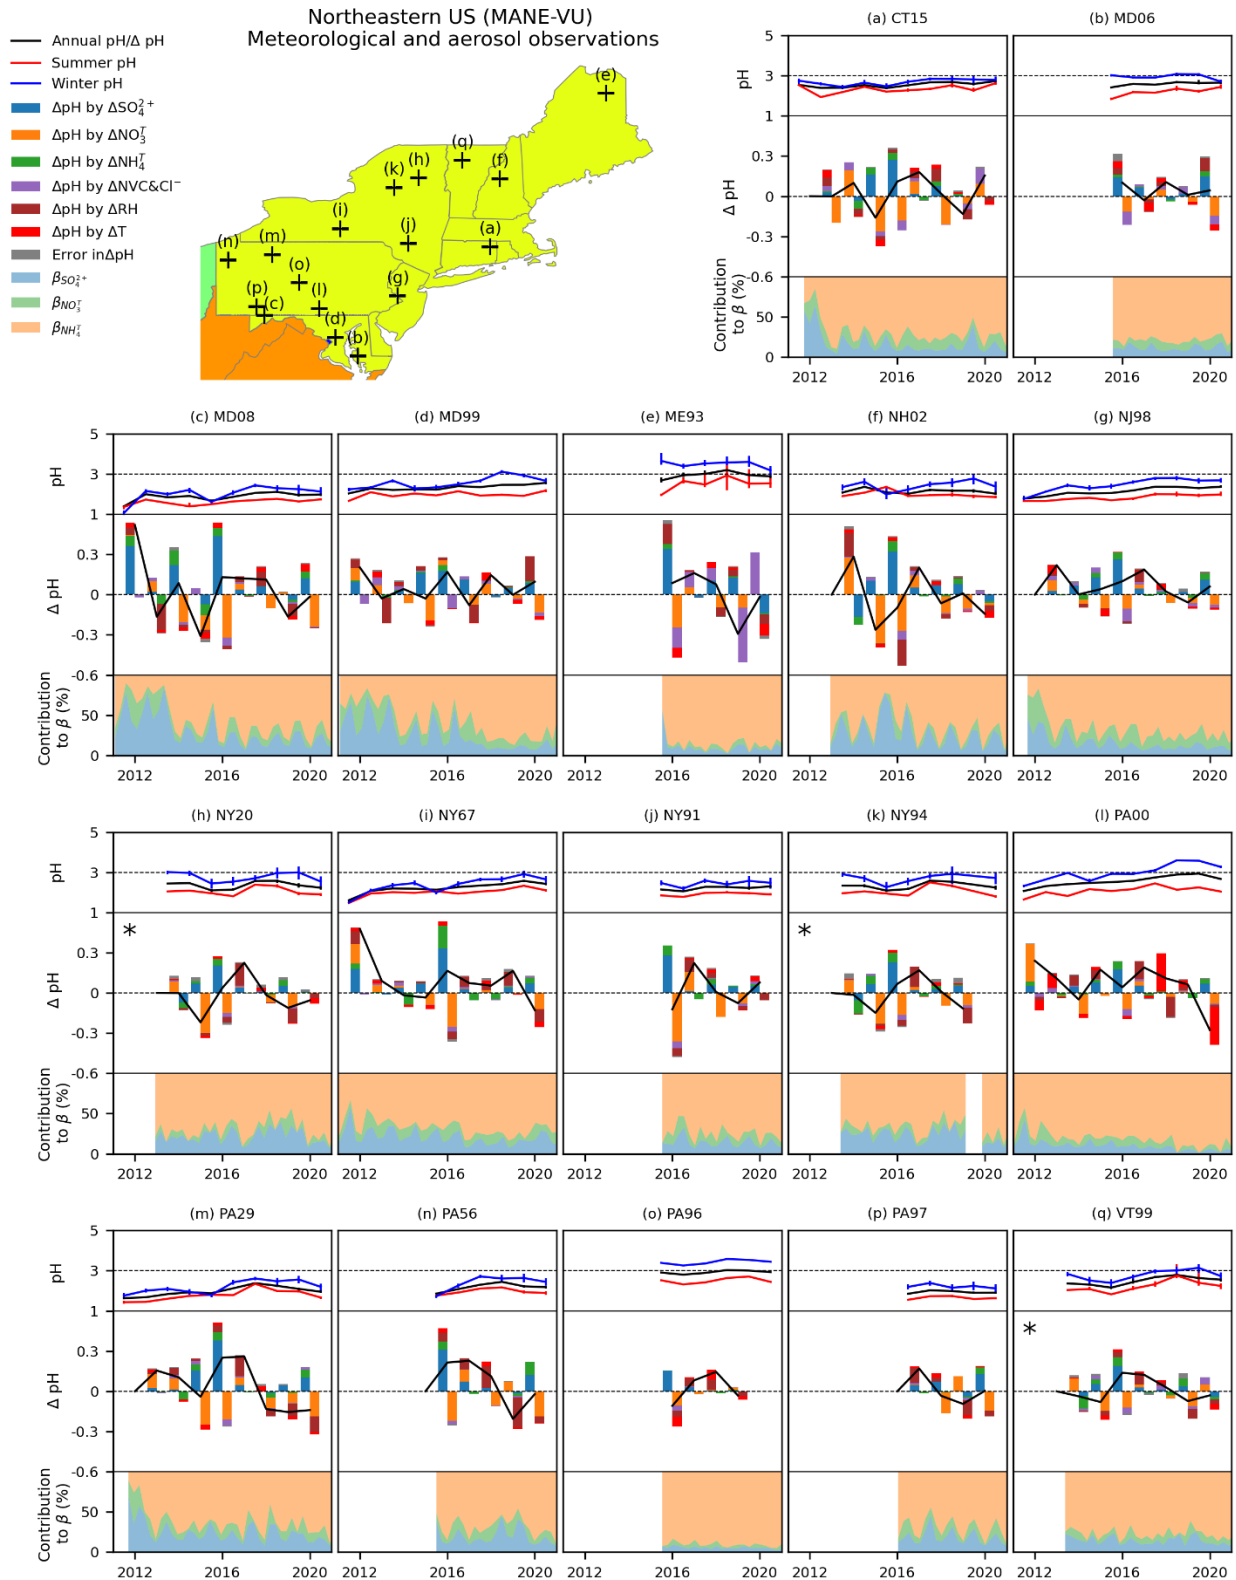

**Supplementary Figure 34.** Same as Supplementary Fig. 31 but for the Northeastern US (MANE-VU). The top panels of each site plot show annual, summer, and winter pH, and lines and bars represent the mean values and the 95% CI (as the 2.5<sup>th</sup> to the 97.5<sup>th</sup> percentiles) derived from 1000 Monte Carlo simulations. The base map is obtained from Natural Earth.

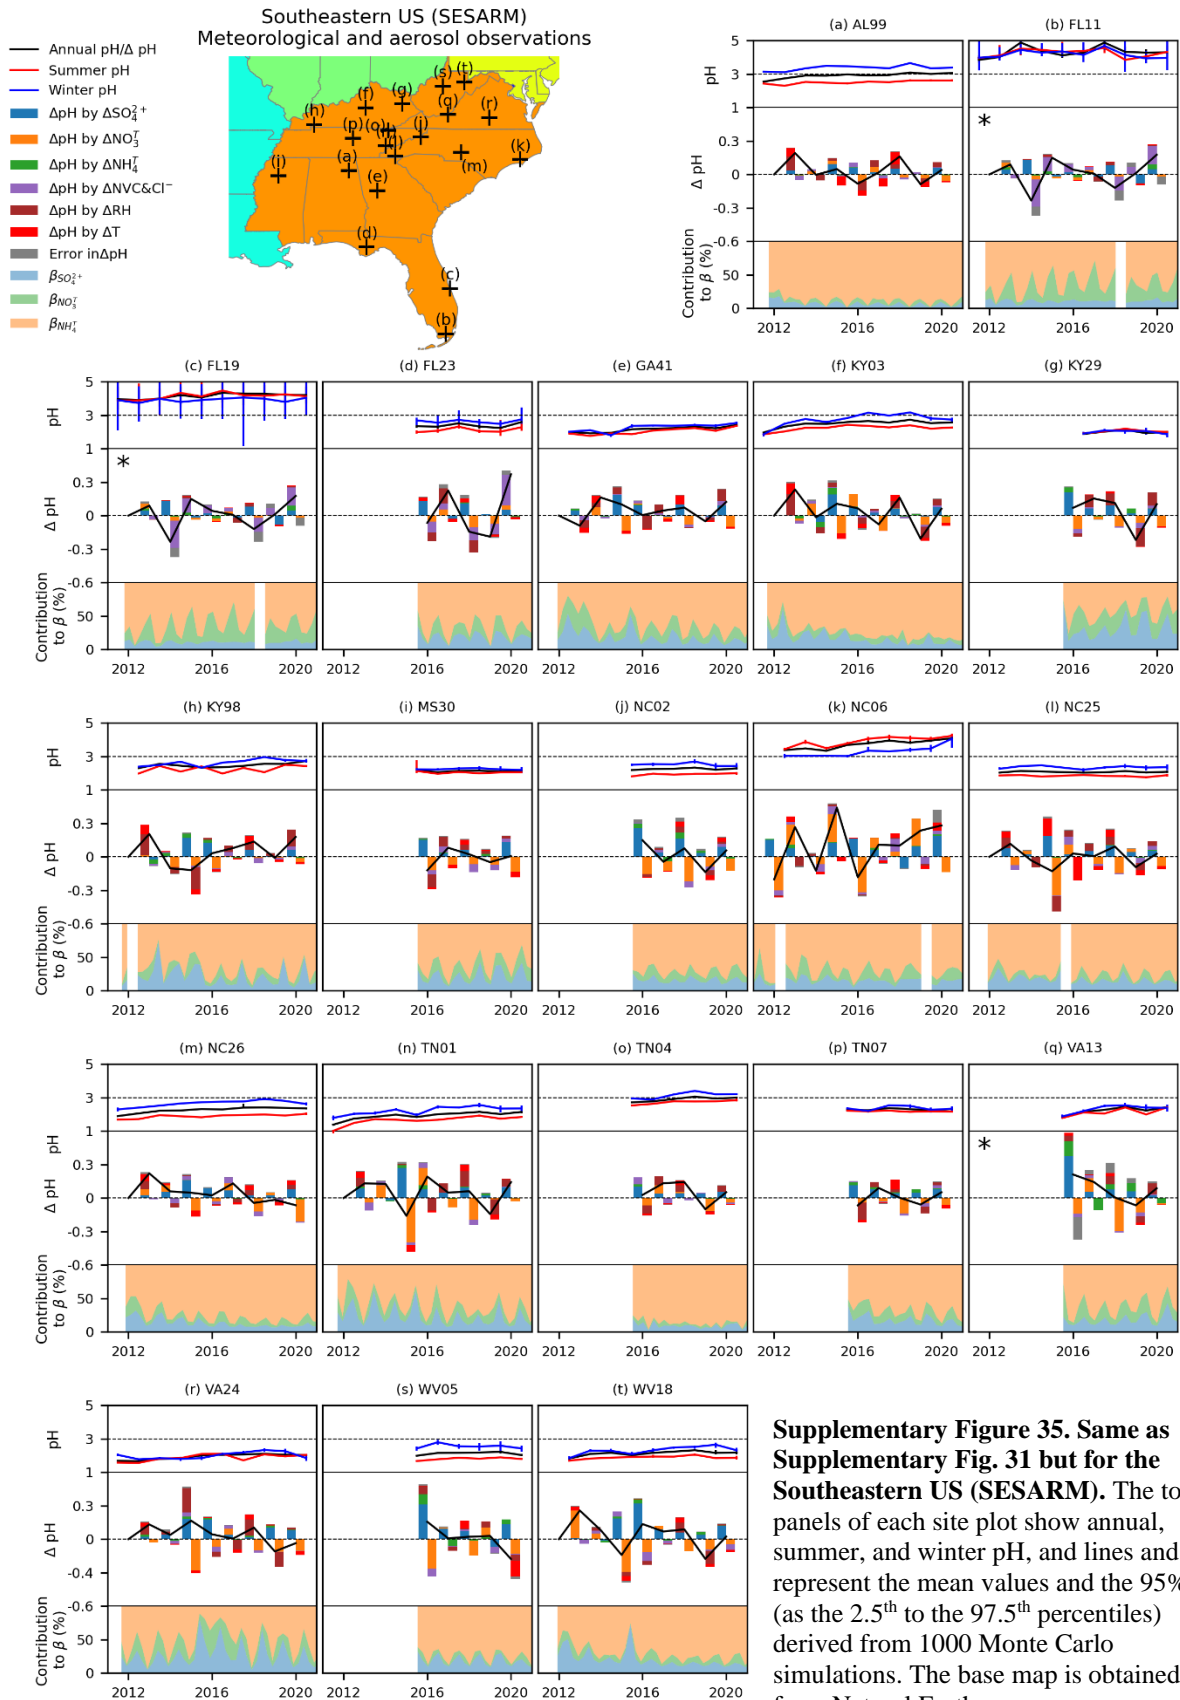

**Supplementary Figure 35. Same as Supplementary Fig. 31 but for the Southeastern US (SESARM).** The top panels of each site plot show annual, summer, and winter pH, and lines and bars represent the mean values and the 95% CI (as the 2.5<sup>th</sup> to the 97.5<sup>th</sup> percentiles) derived from 1000 Monte Carlo simulations. The base map is obtained from Natural Earth.

## Supplementary Tables

**Supplementary Table 1. Observations available at each site.** Sites are named using AMoN site IDs. The first symbol in the parentheses (except for NARR) is the site name within the corresponding network. The number following the network name shows the distance of the site or the grid center for NARR to the AMoN site of the site.

| Site (AMoN) | HNO <sub>3</sub> , PM Composition, RH, and T | PM <sub>2.5</sub> Composition       | RH and T                          | Land type <sup>a</sup> | Start date | End date |
|-------------|----------------------------------------------|-------------------------------------|-----------------------------------|------------------------|------------|----------|
| AL99        | CAST(SND152,0.1)                             | CSN(131150003,59.5)                 | ISD(999999-63857,0.8) NARR(12.5)  | A                      | 2011-03    | N.A.     |
| AR03        | CAST(CAD150,0.0)                             | CSN(51190007,98.7)                  | ISD(720394-00428,9.4) NARR(2.6)   | F                      | 2011-03    | N.A.     |
| AR09        | CAST(CHE185,73.7)                            | IMP(STIL1,73.7) CSN(400019009,73.7) | ISD(723445-93993,50.7) NARR(11.0) | A                      | 2015-10    | N.A.     |
| AR15        | CAST(CHE185,76.7)                            | IMP(STIL1,76.7) CSN(400019009,76.7) | ISD(723445-93993,30.0) NARR(10.0) | A                      | 2015-10    | N.A.     |
| AZ98        | CAST(CHA467,0.0)                             | IMP(CHIR1,0.0)                      | ISD(999999-03085,0.0) NARR(14.1)  | OR                     | 2011-03    | N.A.     |
| CA44        | CAST(YOS404,0.3)                             | IMP(YOSE1,0.0)                      | NARR(18.9)                        | F                      | 2011-03    | N.A.     |
| CA67        | CAST(JOT403,0.2)                             | IMP(JOSH1,0.0)                      | NARR(13.0)                        | D                      | 2011-03    | N.A.     |
| CA83        | CAST(SEK430,0.0)                             | IMP(SEQU1,0.6)                      | NARR(7.7)                         | Unk                    | 2011-03    | N.A.     |
| CO10        | CAST(GTH161,0.2)                             | N.A.                                | ISD(724673-93009,65.2) NARR(14.4) | OR                     | 2012-09    | N.A.     |
| CO88        | CAST(ROM206,0.1)                             | IMP(ROMO1,0.1)                      | NARR(15.8)                        | Unk                    | 2011-05    | N.A.     |
| CT15        | CAST(ABT147,0.1)                             | N.A.                                | ISD(725084-54767,18.1) NARR(15.7) | U/A                    | 2011-03    | N.A.     |
| FL11        | CAST(EVE419,0.4)                             | IMP(EVER1,0.1) CSN(120110034,85.1)  | ISD(998297-99999,19.5) NARR(8.7)  | F/M                    | 2011-03    | N.A.     |
| FL19        | CAST(IRL141,0.0)                             | N.A.                                | ISD(994951-99999,1.8) NARR(16.3)  | M                      | 2011-04    | N.A.     |
| FL23        | CAST(SUM156,0.6)                             | IMP(SAMA1,79.8) CSN(120730012,71.8) | ISD(997992-99999,37.9) NARR(15.1) | F                      | 2015-01    | N.A.     |
| GA40        | CAST(SND152,94.2)                            | IMP(ATLA1,74.7) CSN(130890002,74.7) | ISD(720714-00252,9.8) NARR(11.4)  | A                      | 2011-12    | 2017-01  |
| GA41        | CAST(GAS153,0.5)                             | IMP(ATLA1,57.5) CSN(130890002,57.5) | ISD(720966-00339,13.6) NARR(7.7)  | A                      | 2011-06    | N.A.     |
| ID07        | CAST(NPT006,0.1)                             | N.A.                                | ISD(726873-00452,37.7) NARR(13.7) | Unk                    | 2015-12    | N.A.     |
| IL11        | CAST(BVL130,0.2)                             | IMP(BOND1,0.1) CSN(170191001,0.1)   | ISD(999999-54808,0.1) NARR(14.6)  | A                      | 2007-10    | N.A.     |
| IL37        | CAST(STK138,0.0)                             | CSN(191630015,97.2)                 | ISD(722204-04996,28.2) NARR(20.9) | A                      | 2011-04    | N.A.     |
| IL46        | CAST(ALH157,0.0)                             | CSN(171190024,49.0)                 | ISD(722972-63878,33.0) NARR(10.3) | A                      | 2011-03    | N.A.     |
| IN20        | CAST(SAL133,16.8)                            | CSN(180650003,92.5)                 | ISD(725330-14827,26.1) NARR(13.1) | A                      | 2015-01    | N.A.     |
| IN22        | CAST(VIN140,0.1)                             | CSN(180372001,62.0)                 | ISD(725342-13809,10.8) NARR(5.4)  | A                      | 2015-01    | N.A.     |
| KS03        | CAST(KIC003,15.9)                            | N.A.                                | ISD(725533-94957,11.4) NARR(5.9)  | P                      | 2014-02    | N.A.     |
| KS31        | CAST(KNZ184,0.0)                             | IMP(TALL1,74.4) CSN(200170001,74.4) | ISD(999999-53974,0.1) NARR(22.0)  | P                      | 2011-03    | N.A.     |
| KS97        | CAST(KIC003,10.6)                            | N.A.                                | ISD(725533-94957,35.7) NARR(8.4)  | P                      | 2015-01    | N.A.     |
| KY03        | CAST(MCK131,0.1)                             | N.A.                                | ISD(720448-00144,28.3) NARR(20.5) | A                      | 2011-03    | N.A.     |
| KY29        | CAST(CKT136,0.0)                             | N.A.                                | ISD(720458-00476,42.2) NARR(13.8) | A                      | 2015-01    | N.A.     |
| KY98        | CAST(CDZ171,0.2)                             | IMP(CADII,0.0)                      | ISD(746710-13806,35.2) NARR(11.6) | A                      | 2011-03    | N.A.     |
| MD06        | CAST(BWR139,0.0)                             | IMP(WASH1,93.4) CSN(100010003,94.2) | ISD(722218-00356,11.9) NARR(19.1) | F/M                    | 2015-01    | N.A.     |
| MD08        | CAST(LRL117,37.6)                            | IMP(FRRE1,0.1) CSN(240230002,0.1)   | ISD(725293-99999,31.3) NARR(19.0) | F                      | 2010-08    | N.A.     |
| MD99        | CAST(BEL116,0.0)                             | IMP(WASH1,25.3) CSN(240330030,6.1)  | ISD(724065-99999,8.1) NARR(14.4)  | OR                     | 2010-08    | N.A.     |
| ME93        | CAST(ASH135,0.1)                             | IMP(PRIS1,30.8) CSN(230031020,30.8) | ISD(727130-14604,29.1) NARR(20.8) | A                      | 2015-01    | N.A.     |
| MI51        | CAST(UVL124,0.0)                             | N.A.                                | ISD(722007-54828,18.5) NARR(20.5) | A                      | 2015-01    | N.A.     |
| MI52        | CAST(ANA115,0.0)                             | IMP(DETR1,60.7) CSN(261630001,60.7) | ISD(725378-04887,24.6) NARR(15.7) | F                      | 2015-02    | N.A.     |
| MI95        | CAST(HOX148,0.0)                             | N.A.                                | ISD(726384-14817,28.1) NARR(17.9) | F                      | 2015-01    | N.A.     |
| MI96        | CAST(ANA115,60.6)                            | IMP(DETR1,2.5) CSN(261630001,2.5)   | ISD(725370-94847,11.0) NARR(12.0) | F                      | 2007-10    | N.A.     |
| MN02        | CAST(RED004,0.0)                             | N.A.                                | ISD(727486-04983,40.0) NARR(11.9) | F                      | 2015-01    | N.A.     |
| MS30        | CAST(CVL151,0.0)                             | N.A.                                | ISD(720541-53806,48.1) NARR(16.0) | F                      | 2015-01    | N.A.     |
| NC02        | CAST(PNF126,0.2)                             | N.A.                                | NARR(8.9)                         | F                      | 2015-01    | N.A.     |
| NC06        | CAST(BFT142,0.1)                             | IMP(SWAN1,73.3)                     | ISD(723037-93765,17.2) NARR(15.0) | A                      | 2010-04    | 2018-08  |
| NC25        | CAST(COW137,0.0)                             | IMP(GRSM1,78.8) CSN(370210034,97.8) | ISD(720259-63844,18.1) NARR(13.1) | F                      | 2011-05    | N.A.     |
| NC26        | CAST(CND125,0.1)                             | N.A.                                | ISD(721038-99999,14.8) NARR(6.4)  | F                      | 2011-04    | N.A.     |
| NH02        | CAST(WST109,0.2)                             | N.A.                                | ISD(742078-64773,18.7) NARR(14.8) | F                      | 2012-06    | N.A.     |
| NJ98        | CAST(WSP144,0.1)                             | N.A.                                | ISD(724095-14792,6.2) NARR(8.3)   | OR                     | 2011-03    | N.A.     |
| NM98        | CAST(MEV405,86.1)                            | N.A.                                | ISD(724625-93005,38.3) NARR(17.9) | F                      | 2008-01    | N.A.     |
| NY20        | CAST(HWF187,0.0)                             | CSN(360310003,55.0)                 | ISD(726228-94740,45.8) NARR(6.0)  | F                      | 2012-06    | N.A.     |
| NY67        | CAST(CTH110,0.4)                             | N.A.                                | ISD(725155-94761,18.2) NARR(16.4) | F                      | 2007-10    | N.A.     |
| NY91        | CAST(CAT175,0.1)                             | N.A.                                | NARR(14.0)                        | F                      | 2015-01    | N.A.     |
| NY94        | CAST(NIC001,0.6)                             | N.A.                                | ISD(726228-94740,99.7) NARR(8.3)  | F                      | 2012-11    | 2018-09  |
| OH02        | CAST(QAK172,97.2)                            | IMP(QUC11,97.2)                     | ISD(720397-00131,14.1) NARR(14.2) | A                      | 2007-10    | N.A.     |
| OH09        | CAST(OXF122,0.1)                             | CSN(391351001,33.9)                 | ISD(725217-53855,25.2) NARR(14.0) | A                      | 2015-01    | N.A.     |
| OH27        | CAST(OXF122,46.0)                            | CSN(390610040,2.6)                  | ISD(724297-93812,9.9) NARR(13.2)  | A                      | 2007-10    | N.A.     |
| OH54        | CAST(DCP114,0.2)                             | N.A.                                | ISD(724284-63825,31.3) NARR(13.2) | A                      | 2011-03    | N.A.     |

|      |                   |                                     |                                   |     |         |      |
|------|-------------------|-------------------------------------|-----------------------------------|-----|---------|------|
| OH99 | CAST(QAK172,0.0)  | IMP(QUC11,0.0) CSN(540511002,51.6)  | ISD(724286-93824,47.2) NARR(14.3) | A   | 2015-01 | N.A. |
| OK99 | CAST(CHE185,0.0)  | IMP(STIL1,0.0) CSN(400019009,0.0)   | ISD(722199-53956,36.0) NARR(15.1) | A   | 2007-10 | N.A. |
| PA00 | CAST(ARE128,0.0)  | N.A.                                | ISD(722826-93762,23.7) NARR(13.2) | A   | 2009-10 | N.A. |
| PA29 | CAST(KEF112,0.1)  | N.A.                                | ISD(725266-04751,25.1) NARR(7.1)  | F   | 2011-03 | N.A. |
| PA56 | CAST(MKG113,0.2)  | N.A.                                | ISD(725104-04843,22.9) NARR(8.5)  | F   | 2014-12 | N.A. |
| PA96 | CAST(PSU106,0.0)  | N.A.                                | ISD(725128-54739,15.9) NARR(5.4)  | A   | 2015-01 | N.A. |
| PA97 | CAST(LRL117,0.1)  | IMP(FRRE1,37.5) CSN(240230002,37.5) | ISD(725127-04726,50.9) NARR(10.8) | F   | 2015-07 | N.A. |
| TN01 | CAST(GRS420,0.2)  | IMP(GRSM1,0.1)                      | ISD(720259-63844,65.8) NARR(20.8) | F   | 2011-03 | N.A. |
| TN04 | CAST(SPD111,0.1)  | CSN(470931020,50.3)                 | ISD(720353-63875,17.6) NARR(12.6) | A   | 2015-01 | N.A. |
| TN07 | CAST(ESP127,0.1)  | N.A.                                | ISD(723274-00372,18.3) NARR(14.0) | F   | 2015-01 | N.A. |
| TX41 | CAST(ALC188,40.5) | N.A.                                | ISD(725021-99999,50.0) NARR(13.4) | Unk | 2015-01 | N.A. |
| UT09 | CAST(CAN407,0.0)  | IMP(CANY1,0.0)                      | ISD(999999-53004,96.5) NARR(15.5) | D   | 2014-05 | N.A. |
| VA13 | CAST(VPI120,0.1)  | N.A.                                | ISD(724125-03859,57.2) NARR(12.9) | A   | 2015-01 | N.A. |
| VA24 | CAST(PED108,0.1)  | CSN(510870014,91.2)                 | ISD(724017-03707,24.4) NARR(8.4)  | F   | 2011-03 | N.A. |
| VT99 | CAST(UND002,0.0)  | IMP(PMRF1,0.0) CSN(500070007,0.0)   | ISD(726114-54771,20.2) NARR(11.8) | F   | 2012-11 | N.A. |
| WI06 | CAST(STK138,96.0) | CSN(550270001,80.7)                 | ISD(720656-99999,11.7) NARR(17.9) | A   | 2019-02 | N.A. |
| WI35 | CAST(PRK134,0.0)  | CSN(551198001,0.1)                  | ISD(726417-54911,25.9) NARR(2.8)  | A   | 2011-03 | N.A. |
| WV05 | CAST(CDR119,0.0)  | CSN(540390011,87.0)                 | ISD(720366-63879,27.3) NARR(2.4)  | F   | 2015-01 | N.A. |
| WV18 | CAST(PAR107,0.1)  | N.A.                                | ISD(724170-13729,27.8) NARR(7.5)  | F   | 2011-06 | N.A. |
| WY06 | CAST(PND165,0.8)  | IMP(BOLA1,15.1)                     | ISD(720522-00443,69.3) NARR(15.3) | F   | 2015-01 | N.A. |
| WY92 | CAST(YEL408,96.8) | IMP(YELL2,96.8)                     | ISD(726664-94173,93.9) NARR(10.7) | A   | 2019-10 | N.A. |
| WY93 | CAST(BAS601,0.0)  | N.A.                                | ISD(726667-24048,26.6) NARR(15.6) | P   | 2015-06 | N.A. |
| WY95 | CAST(CNT169,0.8)  | IMP(MOZ11,98.9)                     | NARR(20.4)                        | F   | 2012-06 | N.A. |

<sup>a</sup> Land types: “A”=Agricultural; “F”=Forest; “OR”=Open range; “D”=Desert; “M”=Marsh; “P”=Prairie; and “Unk”=Unknown.

**Supplementary Table 2. Region definition, information, and sites within each region.** Mean [5<sup>th</sup>, 95<sup>th</sup> percentiles] population densities and emission rates in the regions and near the sites, and annual number of biweekly samples within each region are listed. Sites are named after AMoN IDs. Population (2015) and emission (2017) data are obtained from the Gridded Population of the World, Version 4 (GPWv4, ~30 km×30 km)<sup>28</sup> and EPA's Air Quality Time Series Project Data(EQUATES, 12 km × 12 km)<sup>2</sup>.

| Region          | RPO                                                  | Sites       | Regional mean population density (pop, persons km <sup>-2</sup> ) and emission rates (ton km <sup>-2</sup> yr <sup>-1</sup> ) | Mean population density (pop, persons km <sup>-2</sup> ) and emission rates (ton km <sup>-2</sup> yr <sup>-1</sup> ) within 50 km of the sites | Year | Number of samples <sup>1</sup> |
|-----------------|------------------------------------------------------|-------------|-------------------------------------------------------------------------------------------------------------------------------|------------------------------------------------------------------------------------------------------------------------------------------------|------|--------------------------------|
| Western US      | Western Regional Air Partnership (WRAP)              | AZ98, CA44, | Pop: 32.6 [3×10 <sup>-3</sup> , 51.6]                                                                                         | Pop: 27.6 [3×10 <sup>-3</sup> , 73.3]                                                                                                          | 2011 | 97                             |
|                 |                                                      | CA67, CA83, | SO <sub>2</sub> : 0.11 [2×10 <sup>-6</sup> , 0.15]                                                                            | SO <sub>2</sub> : 0.06 [6×10 <sup>-6</sup> , 0.16]                                                                                             | 2012 | 156                            |
|                 |                                                      | CO10, CO88, | NO <sub>x</sub> : 0.55 [3×10 <sup>-4</sup> , 2.00]                                                                            | NO <sub>x</sub> : 0.41 [1×10 <sup>-4</sup> , 1.63]                                                                                             | 2013 | 182                            |
|                 |                                                      | ID07, UT09, | NH <sub>3</sub> : 0.36 [1×10 <sup>-2</sup> , 1.33]                                                                            | NH <sub>3</sub> : 0.45 [6×10 <sup>-3</sup> , 0.96]                                                                                             | 2014 | 200                            |
|                 |                                                      | WY06, WY93, |                                                                                                                               |                                                                                                                                                | 2015 | 239                            |
|                 |                                                      | WY95        |                                                                                                                               |                                                                                                                                                | 2016 | 279                            |
|                 |                                                      |             |                                                                                                                               |                                                                                                                                                | 2017 | 288                            |
|                 |                                                      |             |                                                                                                                               |                                                                                                                                                | 2018 | 286                            |
|                 |                                                      |             |                                                                                                                               |                                                                                                                                                | 2019 | 278                            |
|                 |                                                      |             |                                                                                                                               |                                                                                                                                                | 2020 | 279                            |
| Central US      | Central States Air Resource Agencies (CENSARA)       | AR03, KS03, | Pop: 33.2 [0.03, 99.2]                                                                                                        | Pop: 18.7 [3×10 <sup>-3</sup> , 73.3]                                                                                                          | 2011 | 64                             |
|                 |                                                      | KS31, KS97, | SO <sub>2</sub> : 0.45 [6×10 <sup>-5</sup> , 0.35]                                                                            | SO <sub>2</sub> : 0.15 [4×10 <sup>-3</sup> , 0.34]                                                                                             | 2012 | 79                             |
|                 |                                                      | OK99, TX41  | NO <sub>x</sub> : 1.19 [0.02, 4.10]                                                                                           | NO <sub>x</sub> : 0.95 [0.10, 2.68]                                                                                                            | 2013 | 71                             |
|                 |                                                      |             | NH <sub>3</sub> : 0.81 [0.05, 2.53]                                                                                           | NH <sub>3</sub> : 0.73 [0.12, 1.82]                                                                                                            | 2014 | 102                            |
|                 |                                                      |             |                                                                                                                               |                                                                                                                                                | 2015 | 156                            |
|                 |                                                      |             |                                                                                                                               |                                                                                                                                                | 2016 | 156                            |
|                 |                                                      |             |                                                                                                                               |                                                                                                                                                | 2017 | 150                            |
|                 |                                                      |             |                                                                                                                               |                                                                                                                                                | 2018 | 150                            |
|                 |                                                      |             |                                                                                                                               |                                                                                                                                                | 2019 | 146                            |
|                 |                                                      |             |                                                                                                                               |                                                                                                                                                | 2020 | 151                            |
| Midwestern US   | Lake Michigan Air Directors Consortium (LADCO)       | IL11, IL37, | Pop: 66.3 [0.3, 292.3]                                                                                                        | Pop: 82.9 [0.5, 488.7]                                                                                                                         | 2011 | 116                            |
|                 |                                                      | IL46, IN20, | SO <sub>2</sub> : 0.43 [4×10 <sup>-4</sup> , 0.39]                                                                            | SO <sub>2</sub> : 0.73 [4×10 <sup>-4</sup> , 0.44]                                                                                             | 2012 | 157                            |
|                 |                                                      | IN22, MI51, | NO <sub>x</sub> : 1.56 [0.04, 6.11]                                                                                           | NO <sub>x</sub> : 2.03 [0.03, 8.79]                                                                                                            | 2013 | 156                            |
|                 |                                                      | MI52, MI95, | NH <sub>3</sub> : 0.73 [0.02, 2.13]                                                                                           | NH <sub>3</sub> : 0.65 [0.03, 1.58]                                                                                                            | 2014 | 149                            |
|                 |                                                      | MN02, OH09, |                                                                                                                               |                                                                                                                                                | 2015 | 356                            |
|                 |                                                      | OH27, OH54, |                                                                                                                               |                                                                                                                                                | 2016 | 364                            |
|                 |                                                      | OH99, WI35  |                                                                                                                               |                                                                                                                                                | 2017 | 365                            |
|                 |                                                      |             |                                                                                                                               |                                                                                                                                                | 2018 | 362                            |
|                 |                                                      |             |                                                                                                                               |                                                                                                                                                | 2019 | 364                            |
|                 |                                                      |             |                                                                                                                               |                                                                                                                                                | 2020 | 363                            |
| Northeastern US | Mid-Atlantic/Northeast Visibility Union (MANE-VU)    | CT15, MD06, | Pop: 159.3 [0.2, 689.5]                                                                                                       | Pop: 141.2 [0.1, 746.4]                                                                                                                        | 2011 | 164                            |
|                 |                                                      | MD08, MD99, | SO <sub>2</sub> : 0.30 [4×10 <sup>-4</sup> , 0.53]                                                                            | SO <sub>2</sub> : 0.21 [3×10 <sup>-4</sup> , 0.36]                                                                                             | 2012 | 228                            |
|                 |                                                      | ME93, NH02, | NO <sub>x</sub> : 1.93 [0.02, 7.92]                                                                                           | NO <sub>x</sub> : 1.83 [0.03, 8.61]                                                                                                            | 2013 | 285                            |
|                 |                                                      | NJ98, NY20, | NH <sub>3</sub> : 0.35 [0.02, 1.13]                                                                                           | NH <sub>3</sub> : 0.32 [0.02, 1.05]                                                                                                            | 2014 | 285                            |
|                 |                                                      | NY67, NY91, |                                                                                                                               |                                                                                                                                                | 2015 | 421                            |
|                 |                                                      | NY94, PA00, |                                                                                                                               |                                                                                                                                                | 2016 | 442                            |
|                 |                                                      | PA29, PA56, |                                                                                                                               |                                                                                                                                                | 2017 | 433                            |
|                 |                                                      | PA96, PA97, |                                                                                                                               |                                                                                                                                                | 2018 | 435                            |
|                 |                                                      | VT99        |                                                                                                                               |                                                                                                                                                | 2019 | 433                            |
|                 |                                                      |             |                                                                                                                               |                                                                                                                                                | 2020 | 441                            |
| Southeastern US | Southeastern Air Pollution Control Agencies (SESARM) | AL99, FL19, | Pop: 78.1 [0.6, 375.3]                                                                                                        | Pop: 59.2 [0.7, 236.7]                                                                                                                         | 2011 | 208                            |
|                 |                                                      | FL23, GA41, | SO <sub>2</sub> : 0.42 [2×10 <sup>-3</sup> , 0.32]                                                                            | SO <sub>2</sub> : 0.21 [9× <sup>-4</sup> , 0.21]                                                                                               | 2012 | 316                            |
|                 |                                                      | KY03, KY29, | NO <sub>x</sub> : 1.64 [0.07, 6.60]                                                                                           | NO <sub>x</sub> : 1.22 [0.07, 4.29]                                                                                                            | 2013 | 303                            |
|                 |                                                      | KY98, MS30, | NH <sub>3</sub> : 0.63 [0.08, 1.78]                                                                                           | NH <sub>3</sub> : 0.85 [0.06, 2.80]                                                                                                            | 2014 | 304                            |
|                 |                                                      | NC02, NC06, |                                                                                                                               |                                                                                                                                                | 2015 | 498                            |
|                 |                                                      | NC25, NC26, |                                                                                                                               |                                                                                                                                                | 2016 | 519                            |
|                 |                                                      | TN01, TN04, |                                                                                                                               |                                                                                                                                                | 2017 | 503                            |
|                 |                                                      | TN07, VA13, |                                                                                                                               |                                                                                                                                                | 2018 | 503                            |
|                 |                                                      | VA24, WV05, |                                                                                                                               |                                                                                                                                                | 2019 | 513                            |
|                 |                                                      | WV18        |                                                                                                                               |                                                                                                                                                | 2020 | 520                            |

**Supplementary Table 3. Case studies of pre-processing of integrated observations for ISORROPIA simulations.** The impacts of coarse mode NVCs and Cl<sup>-</sup> and diel variations of meteorological and chemical conditions on ISORROPIA-II performance are investigated.  $c_{\text{SO}_4^{2-}}$ ,  $c_{\text{NO}_3^-}$ , and  $c_{\text{NH}_4^+}$  observations from CASTNET and AMoN and T and RH observations from CASTNET, ISD, and NARR are used for all cases. Case 1 is the default configuration for all analyses in this study. Case 2 represents the results using raw inputs from the integrated observations. Case 3 and 4 show that including coarse mode components leads to overestimation of  $c_{\text{NH}_4^+}$  and  $c_{\text{NO}_3^-}$ . Cases 5 - 7 illustrate the importance of diel patterns of meteorological conditions, boundary layer height, and  $c_{\text{NH}_4^+}$ , respectively. Case 8 and 9 show that sampling biases have low impacts on model evaluation.

| Case                                                                                                                                                                         | Species                      | $m$   | $\delta_m$ | $b$    | $\delta_b$ | $R^2$ | NMB    | RMSE  |
|------------------------------------------------------------------------------------------------------------------------------------------------------------------------------|------------------------------|-------|------------|--------|------------|-------|--------|-------|
| Case 1 (default):<br>Scaled CASTNET<br>NVC and Cl <sup>-</sup> ; TS=3hr;<br>$n=13813$                                                                                        | NH <sub>4</sub> <sup>+</sup> | 1.202 | 0.003      | -0.075 | 0.002      | 0.941 | 5.8%   | 0.123 |
|                                                                                                                                                                              | NO <sub>3</sub> <sup>-</sup> | 1.118 | 0.003      | -0.021 | 0.003      | 0.931 | 8.4%   | 0.262 |
|                                                                                                                                                                              | HNO <sub>3</sub>             | 1.164 | 0.006      | -0.156 | 0.005      | 0.699 | -6.3%  | 0.261 |
|                                                                                                                                                                              | NH <sub>3</sub>              | 1.008 | 0.001      | -0.039 | 0.001      | 0.993 | -2.4%  | 0.116 |
|                                                                                                                                                                              | $\epsilon_{\text{NH}_4^+}$   | 1.243 | 0.003      | -0.075 | 0.001      | 0.898 | 3.8%   | 0.084 |
|                                                                                                                                                                              | $\epsilon_{\text{NO}_3^-}$   | 1.355 | 0.008      | -0.141 | 0.004      | 0.581 | 3.7%   | 0.177 |
| Case 2:<br>IMPROVE/CSN NVC<br>and Cl <sup>-</sup> ; TS=3hr;<br>$n=4424$                                                                                                      | NH <sub>4</sub> <sup>+</sup> | 1.103 | 0.007      | -0.017 | 0.004      | 0.832 | 6.6%   | 0.164 |
|                                                                                                                                                                              | NO <sub>3</sub> <sup>-</sup> | 1.094 | 0.004      | -0.004 | 0.005      | 0.937 | 8.7%   | 0.241 |
|                                                                                                                                                                              | HNO <sub>3</sub>             | 1.127 | 0.008      | -0.129 | 0.007      | 0.793 | -4.6%  | 0.240 |
|                                                                                                                                                                              | NH <sub>3</sub>              | 1.019 | 0.001      | -0.057 | 0.003      | 0.991 | -2.1%  | 0.155 |
|                                                                                                                                                                              | $\epsilon_{\text{NH}_4^+}$   | 1.253 | 0.010      | -0.091 | 0.004      | 0.834 | -1.5%  | 0.101 |
|                                                                                                                                                                              | $\epsilon_{\text{NO}_3^-}$   | 1.274 | 0.014      | -0.103 | 0.006      | 0.618 | -2.2%  | 0.169 |
| Case 3: Raw<br>CASTNET NVC and<br>Cl <sup>-</sup> ; TS=2wk; $n=13813$                                                                                                        | NH <sub>4</sub> <sup>+</sup> | 1.100 | 0.004      | -0.212 | 0.002      | 0.865 | -26.7% | 0.218 |
|                                                                                                                                                                              | NO <sub>3</sub> <sup>-</sup> | 1.217 | 0.003      | -0.081 | 0.003      | 0.933 | 8.4%   | 0.321 |
|                                                                                                                                                                              | HNO <sub>3</sub>             | 1.231 | 0.007      | -0.210 | 0.006      | 0.629 | -6.5%  | 0.321 |
|                                                                                                                                                                              | NH <sub>3</sub>              | 1.060 | 0.001      | 0.085  | 0.002      | 0.990 | 11.2%  | 0.206 |
|                                                                                                                                                                              | $\epsilon_{\text{NH}_4^+}$   | 1.242 | 0.005      | -0.206 | 0.002      | 0.825 | -27.5% | 0.153 |
|                                                                                                                                                                              | $\epsilon_{\text{NO}_3^-}$   | 1.669 | 0.009      | -0.296 | 0.004      | 0.662 | -1.5%  | 0.210 |
| Case 4: Raw<br>CASTNET NVC and<br>Cl <sup>-</sup> ; TS=3hr; $n=13813$                                                                                                        | NH <sub>4</sub> <sup>+</sup> | 1.072 | 0.003      | -0.181 | 0.002      | 0.888 | -24.2% | 0.192 |
|                                                                                                                                                                              | NO <sub>3</sub> <sup>-</sup> | 1.155 | 0.002      | 0.046  | 0.003      | 0.942 | 19.2%  | 0.301 |
|                                                                                                                                                                              | HNO <sub>3</sub>             | 1.054 | 0.006      | -0.176 | 0.005      | 0.663 | -18.4% | 0.291 |
|                                                                                                                                                                              | NH <sub>3</sub>              | 1.057 | 0.001      | 0.071  | 0.001      | 0.992 | 10.3%  | 0.182 |
|                                                                                                                                                                              | $\epsilon_{\text{NH}_4^+}$   | 1.196 | 0.004      | -0.171 | 0.002      | 0.861 | -24.4% | 0.130 |
|                                                                                                                                                                              | $\epsilon_{\text{NO}_3^-}$   | 1.367 | 0.007      | -0.079 | 0.004      | 0.654 | 16.1%  | 0.182 |
| Case 5: Scaled<br>CASTNET NVC and<br>Cl <sup>-</sup> ; TS=2wk; $n=13813$                                                                                                     | NH <sub>4</sub> <sup>+</sup> | 1.223 | 0.003      | -0.108 | 0.002      | 0.928 | 1.8%   | 0.137 |
|                                                                                                                                                                              | NO <sub>3</sub> <sup>-</sup> | 1.192 | 0.003      | -0.147 | 0.003      | 0.917 | -1.2%  | 0.321 |
|                                                                                                                                                                              | HNO <sub>3</sub>             | 1.307 | 0.007      | -0.179 | 0.006      | 0.642 | 4.5%   | 0.328 |
|                                                                                                                                                                              | NH <sub>3</sub>              | 1.012 | 0.001      | -0.022 | 0.001      | 0.990 | -0.7%  | 0.129 |
|                                                                                                                                                                              | $\epsilon_{\text{NH}_4^+}$   | 1.269 | 0.004      | -0.102 | 0.002      | 0.872 | -0.9%  | 0.095 |
|                                                                                                                                                                              | $\epsilon_{\text{NO}_3^-}$   | 1.625 | 0.010      | -0.341 | 0.005      | 0.593 | -13.2% | 0.228 |
| Case 6: Scaled<br>CASTNET NVC and<br>Cl <sup>-</sup> ; diel pattern $\propto$<br>Planetary boundary<br>layer height from<br>NARR; TS=3hr;<br>$n=13813$                       | NH <sub>4</sub> <sup>+</sup> | 1.214 | 0.002      | -0.049 | 0.002      | 0.945 | 11.8%  | 0.137 |
|                                                                                                                                                                              | NO <sub>3</sub> <sup>-</sup> | 1.108 | 0.003      | 0.090  | 0.003      | 0.927 | 21.9%  | 0.308 |
|                                                                                                                                                                              | HNO <sub>3</sub>             | 0.989 | 0.006      | -0.141 | 0.004      | 0.640 | -21.3% | 0.297 |
|                                                                                                                                                                              | NH <sub>3</sub>              | 1.000 | 0.001      | -0.059 | 0.001      | 0.992 | -4.9%  | 0.129 |
|                                                                                                                                                                              | $\epsilon_{\text{NH}_4^+}$   | 1.177 | 0.004      | -0.035 | 0.002      | 0.829 | 8.1%   | 0.104 |
|                                                                                                                                                                              | $\epsilon_{\text{NO}_3^-}$   | 1.184 | 0.008      | 0.022  | 0.004      | 0.517 | 21.6%  | 0.197 |
| Case 7: Scaled<br>CASTNET NVC and<br>Cl <sup>-</sup> ; NH <sub>4</sub> <sup>+</sup> diel pattern;<br>TS=3hr; $n=13813$                                                       | NH <sub>4</sub> <sup>+</sup> | 1.138 | 0.002      | -0.069 | 0.002      | 0.939 | 1.2%   | 0.109 |
|                                                                                                                                                                              | NO <sub>3</sub> <sup>-</sup> | 1.092 | 0.002      | -0.019 | 0.003      | 0.931 | 6.1%   | 0.247 |
|                                                                                                                                                                              | HNO <sub>3</sub>             | 1.163 | 0.006      | -0.137 | 0.004      | 0.723 | -3.7%  | 0.247 |
|                                                                                                                                                                              | NH <sub>3</sub>              | 1.007 | 0.001      | -0.014 | 0.001      | 0.994 | -0.5%  | 0.103 |
|                                                                                                                                                                              | $\epsilon_{\text{NH}_4^+}$   | 1.170 | 0.003      | -0.066 | 0.001      | 0.896 | -0.9%  | 0.075 |
|                                                                                                                                                                              | $\epsilon_{\text{NO}_3^-}$   | 1.332 | 0.008      | -0.140 | 0.004      | 0.582 | 1.7%   | 0.173 |
| Case 8: Scaled<br>CASTNET NVC and<br>Cl <sup>-</sup> ; NH <sub>3</sub> increased by<br>10%; TS=3hr;<br>$n=13813$                                                             | NH <sub>4</sub> <sup>+</sup> | 1.083 | 0.004      | -0.140 | 0.003      | 0.809 | -12.9% | 0.205 |
|                                                                                                                                                                              | NO <sub>3</sub> <sup>-</sup> | 1.126 | 0.003      | -0.012 | 0.003      | 0.930 | 10.3%  | 0.270 |
|                                                                                                                                                                              | HNO <sub>3</sub>             | 1.153 | 0.006      | -0.163 | 0.005      | 0.685 | -8.4%  | 0.267 |
|                                                                                                                                                                              | NH <sub>3</sub>              | 1.108 | 0.001      | -0.042 | 0.001      | 0.994 | 6.7%   | 0.194 |
|                                                                                                                                                                              | $\epsilon_{\text{NH}_4^+}$   | 1.246 | 0.003      | -0.069 | 0.001      | 0.903 | 4.8%   | 0.082 |
|                                                                                                                                                                              | $\epsilon_{\text{NO}_3^-}$   | 1.359 | 0.009      | -0.132 | 0.004      | 0.576 | 5.8%   | 0.180 |
| Case 9: Scaled<br>CASTNET NVC and<br>Cl <sup>-</sup> ; decrease $\epsilon_{\text{NO}_3^-}$ for<br>high T and low RH<br>(T>20 °C and<br>RH<60%) periods;<br>TS=3hr; $n=13813$ | NH <sub>4</sub> <sup>+</sup> | 1.202 | 0.003      | -0.075 | 0.002      | 0.941 | 5.7%   | 0.122 |
|                                                                                                                                                                              | NO <sub>3</sub> <sup>-</sup> | 1.127 | 0.003      | -0.050 | 0.003      | 0.920 | 5.6%   | 0.275 |
|                                                                                                                                                                              | HNO <sub>3</sub>             | 1.234 | 0.007      | -0.179 | 0.005      | 0.652 | -3.5%  | 0.277 |
|                                                                                                                                                                              | NH <sub>3</sub>              | 1.008 | 0.001      | -0.039 | 0.001      | 0.993 | -2.4%  | 0.116 |
|                                                                                                                                                                              | $\epsilon_{\text{NH}_4^+}$   | 1.244 | 0.003      | -0.075 | 0.001      | 0.897 | 3.7%   | 0.084 |
|                                                                                                                                                                              | $\epsilon_{\text{NO}_3^-}$   | 1.433 | 0.010      | -0.197 | 0.005      | 0.531 | 0.6%   | 0.187 |

**Supplementary Table 4. Region trends derived from Theil-Sen regressions and Mann-Kendall tests.** Trends of observed concentrations ( $c$ ), aerosol composition ( $f$ ), pH, partitionings of  $\text{NH}_4^+$  and  $\text{NO}_3^-$  ( $\epsilon_{\text{NH}_4^+}$  and  $\epsilon_{\text{NO}_3^-}$ ), and  $\Delta c_{\text{SIA}}/\Delta c_{\text{p}}$  ( $\text{p}=\text{SO}_4^{2-}$ ,  $\text{NO}_3^{\text{T}}$ ,  $\text{NH}_4^{\text{T}}$ ). “\*” and “\*\*” indicate the trends are  $p<0.05$  and  $p<0.01$ , respectively. The annual changing rates are the median annual changing rate of the sites within a region. “W US”, “C US”, “MW US”, “NE US”, “SE US” stand for the Western, Central, Midwestern, Northeastern, Southeastern US, respectively. Annual changing rates are normalized to the first values of the period. Long-term sites refer to the sites with data for 2011 – 20201. Trend analyses for 2011 – 2020 using data from all sites and long-term sites are consistent.

| Species                                | Region | All sites (n=41), 2011 – 2015 |                                   | All sites (n=68), 2015 – 2020 |                                   | All sites (n=68), 2011 – 2020 |                                   | Long-term sites (n=41), 2011 – 2020 |                                   |
|----------------------------------------|--------|-------------------------------|-----------------------------------|-------------------------------|-----------------------------------|-------------------------------|-----------------------------------|-------------------------------------|-----------------------------------|
|                                        |        | Trend                         | Annual rate (% yr <sup>-1</sup> ) | Trend                         | Annual rate (% yr <sup>-1</sup> ) | Trend                         | Annual rate (% yr <sup>-1</sup> ) | Trend                               | Annual rate (% yr <sup>-1</sup> ) |
| $c_{\text{SO}_4^{2-}}$                 | W US   | decreasing**                  | -6.9%                             | no trend                      | -0.2%                             | decreasing**                  | -3.6%                             | decreasing**                        | -3.6%                             |
|                                        | C US   | decreasing**                  | -6.8%                             | decreasing**                  | -5.7%                             | decreasing**                  | -5.3%                             | decreasing**                        | -5.4%                             |
|                                        | MW US  | decreasing**                  | -4.3%                             | decreasing**                  | -5.1%                             | decreasing**                  | -6.2%                             | decreasing**                        | -6.4%                             |
|                                        | NE US  | decreasing**                  | -7.8%                             | decreasing**                  | -5.3%                             | decreasing**                  | -6.7%                             | decreasing**                        | -6.8%                             |
|                                        | SE US  | decreasing**                  | -5.8%                             | decreasing**                  | -6.8%                             | decreasing**                  | -5.9%                             | decreasing**                        | -5.7%                             |
| $c_{\text{NO}_3^-}$                    | W US   | no trend                      | -3.7%                             | no trend                      | 0.3%                              | decreasing**                  | -1.9%                             | decreasing**                        | -2.0%                             |
|                                        | C US   | no trend                      | -7.4%                             | decreasing*                   | -3.1%                             | decreasing**                  | -3.8%                             | decreasing**                        | -3.8%                             |
|                                        | MW US  | no trend                      | 0.0%                              | decreasing*                   | -1.2%                             | decreasing**                  | -2.3%                             | decreasing**                        | -2.4%                             |
|                                        | W US   | no trend                      | -1.5%                             | decreasing*                   | -1.5%                             | decreasing**                  | -3.1%                             | decreasing**                        | -3.1%                             |
|                                        | SE US  | no trend                      | -1.2%                             | decreasing**                  | -5.2%                             | decreasing**                  | -3.2%                             | decreasing**                        | -3.1%                             |
| $c_{\text{NH}_4^+}$                    | W US   | increasing*                   | 6.4%                              | no trend                      | 0.4%                              | no trend                      | -1.2%                             | no trend                            | -1.2%                             |
|                                        | C US   | no trend                      | 1.7%                              | no trend                      | -1.7%                             | decreasing**                  | -1.6%                             | decreasing**                        | -1.5%                             |
|                                        | MW US  | no trend                      | 1.2%                              | decreasing**                  | -2.4%                             | decreasing**                  | -1.2%                             | no trend                            | -0.7%                             |
|                                        | W US   | no trend                      | 1.6%                              | decreasing**                  | -3.5%                             | decreasing**                  | -3.4%                             | decreasing**                        | -3.4%                             |
|                                        | SE US  | no trend                      | -0.5%                             | decreasing**                  | -6.3%                             | decreasing**                  | -3.7%                             | decreasing**                        | -3.3%                             |
| $c_{\text{NVC}}$ (as Na <sup>+</sup> ) | W US   | no trend                      | -0.4%                             | no trend                      | 2.0%                              | no trend                      | -0.3%                             | no trend                            | 0.0%                              |
|                                        | C US   | no trend                      | -4.5%                             | no trend                      | -2.0%                             | decreasing*                   | -1.8%                             | decreasing*                         | -2.0%                             |
|                                        | MW US  | no trend                      | 1.2%                              | no trend                      | -0.8%                             | decreasing**                  | -1.6%                             | decreasing**                        | -1.4%                             |
|                                        | W US   | increasing**                  | 4.9%                              | no trend                      | 0.4%                              | decreasing**                  | -0.6%                             | decreasing**                        | -0.6%                             |
|                                        | SE US  | decreasing*                   | -4.0%                             | decreasing**                  | -3.3%                             | decreasing**                  | -1.7%                             | decreasing**                        | -1.4%                             |
| $c_{\text{Cl}^-}$                      | W US   | no trend                      | -2.7%                             | no trend                      | -0.3%                             | no trend                      | 0.5%                              | no trend                            | 0.6%                              |
|                                        | C US   | no trend                      | -0.6%                             | no trend                      | 2.8%                              | no trend                      | -0.2%                             | no trend                            | -0.2%                             |
|                                        | MW US  | increasing**                  | 10.1%                             | no trend                      | -0.3%                             | no trend                      | -0.8%                             | no trend                            | -0.5%                             |
|                                        | W US   | increasing**                  | 11.7%                             | increasing**                  | 2.3%                              | no trend                      | 0.9%                              | no trend                            | 1.0%                              |
|                                        | SE US  | decreasing*                   | -7.6%                             | no trend                      | 0.1%                              | no trend                      | 0.2%                              | no trend                            | 0.6%                              |
| $f_{\text{SO}_4^{2-}}$                 | W US   | no trend                      | -1.3%                             | decreasing**                  | -1.5%                             | decreasing**                  | -1.3%                             | decreasing**                        | -1.4%                             |
|                                        | C US   | no trend                      | -0.5%                             | decreasing**                  | -2.1%                             | decreasing**                  | -1.4%                             | decreasing**                        | -1.3%                             |
|                                        | MW US  | decreasing*                   | -1.8%                             | decreasing**                  | -2.1%                             | decreasing**                  | -2.7%                             | decreasing**                        | -2.5%                             |
|                                        | W US   | decreasing**                  | -2.1%                             | decreasing**                  | -1.7%                             | decreasing**                  | -2.4%                             | decreasing**                        | -2.5%                             |
|                                        | SE US  | decreasing**                  | -1.5%                             | decreasing**                  | -1.5%                             | decreasing**                  | -2.2%                             | decreasing**                        | -2.2%                             |
| $f_{\text{NO}_3^-}$                    | W US   | increasing**                  | 5.0%                              | no trend                      | 0.5%                              | increasing**                  | 1.4%                              | increasing**                        | 1.3%                              |
|                                        | C US   | increasing*                   | 3.6%                              | increasing**                  | 2.1%                              | increasing**                  | 2.3%                              | increasing**                        | 2.3%                              |
|                                        | MW US  | no trend                      | 2.7%                              | increasing**                  | 2.7%                              | increasing**                  | 3.6%                              | increasing**                        | 3.5%                              |
|                                        | W US   | increasing**                  | 7.1%                              | increasing**                  | 2.6%                              | increasing**                  | 4.3%                              | increasing**                        | 4.5%                              |
|                                        | SE US  | increasing**                  | 5.4%                              | no trend                      | 1.0%                              | increasing**                  | 4.2%                              | increasing**                        | 4.5%                              |
| $f_{\text{NH}_4^+}$                    | W US   | decreasing**                  | -1.9%                             | no trend                      | 0.2%                              | decreasing**                  | -1.3%                             | decreasing**                        | -1.4%                             |
|                                        | C US   | no trend                      | 0.1%                              | no trend                      | -1.1%                             | decreasing**                  | -1.5%                             | decreasing**                        | -1.4%                             |
|                                        | MW US  | no trend                      | -0.5%                             | decreasing*                   | -0.5%                             | decreasing**                  | -0.7%                             | decreasing**                        | -0.7%                             |
|                                        | W US   | decreasing**                  | -1.6%                             | decreasing**                  | -0.9%                             | decreasing**                  | -1.3%                             | decreasing**                        | -1.3%                             |
|                                        | SE US  | no trend                      | -0.1%                             | decreasing**                  | -1.3%                             | decreasing**                  | -1.7%                             | decreasing**                        | -1.8%                             |
| $f_{\text{NVC}}$                       | W US   | no trend                      | 2.8%                              | no trend                      | 0.2%                              | increasing**                  | 2.8%                              | increasing**                        | 2.8%                              |
|                                        | C US   | no trend                      | -1.4%                             | increasing*                   | 2.5%                              | increasing**                  | 3.3%                              | increasing**                        | 3.3%                              |
|                                        | MW US  | no trend                      | 1.3%                              | increasing**                  | 3.1%                              | increasing**                  | 3.9%                              | increasing**                        | 4.1%                              |
|                                        | W US   | increasing**                  | 8.6%                              | increasing**                  | 3.9%                              | increasing**                  | 5.2%                              | increasing**                        | 5.3%                              |
|                                        | SE US  | no trend                      | 0.4%                              | increasing**                  | 3.0%                              | increasing**                  | 4.3%                              | increasing**                        | 4.4%                              |
| $f_{\text{Cl}^-}$                      | W US   | no trend                      | 0.6%                              | no trend                      | -1.7%                             | increasing**                  | 3.5%                              | increasing**                        | 3.6%                              |
|                                        | C US   | no trend                      | 5.4%                              | increasing*                   | 3.8%                              | increasing**                  | 3.4%                              | increasing**                        | 3.4%                              |



|                                                     |       |              |       |              |       |              |       |              |       |
|-----------------------------------------------------|-------|--------------|-------|--------------|-------|--------------|-------|--------------|-------|
|                                                     | MW US | increasing** | 6.8%  | increasing** | 2.7%  | increasing** | 4.0%  | increasing** | 4.3%  |
|                                                     | W US  | increasing** | 12.0% | increasing** | 6.0%  | increasing** | 6.0%  | increasing** | 6.1%  |
|                                                     | SE US | no trend     | -5.7% | increasing** | 5.7%  | increasing** | 4.5%  | increasing** | 4.5%  |
| pH                                                  | W US  | increasing*  | 3.5%  | no trend     | 1.9%  | increasing** | 1.5%  | increasing** | 1.6%  |
|                                                     | C US  | increasing*  | 6.0%  | increasing*  | 1.4%  | increasing** | 1.2%  | increasing** | 1.1%  |
|                                                     | MW US | increasing** | 4.9%  | increasing*  | 0.8%  | increasing** | 1.8%  | increasing** | 2.1%  |
|                                                     | W US  | increasing*  | 3.6%  | no trend     | 0.6%  | increasing** | 1.7%  | increasing** | 1.8%  |
|                                                     | SE US | increasing** | 4.9%  | no trend     | 0.5%  | increasing** | 1.6%  | increasing** | 1.7%  |
| $\epsilon_{\text{NH}_4^+}$                          | W US  | decreasing** | -9.5% | no trend     | 0.2%  | decreasing** | -1.9% | decreasing** | -2.0% |
|                                                     | C US  | no trend     | -7.7% | no trend     | -1.4% | decreasing** | -3.9% | decreasing** | -3.9% |
|                                                     | MW US | no trend     | -2.1% | no trend     | -0.9% | decreasing** | -3.5% | decreasing** | -3.8% |
|                                                     | W US  | decreasing** | -7.1% | no trend     | -0.4% | decreasing** | -3.2% | decreasing** | -3.3% |
|                                                     | SE US | decreasing** | -5.8% | no trend     | -1.2% | decreasing** | -3.7% | decreasing** | -4.2% |
| $\epsilon_{\text{NO}_3^-}$                          | W US  | no trend     | 0.9%  | no trend     | 1.0%  | increasing** | 0.7%  | increasing** | 0.6%  |
|                                                     | C US  | increasing*  | 3.9%  | increasing** | 1.6%  | increasing** | 1.2%  | increasing*  | 1.1%  |
|                                                     | MW US | increasing*  | 4.2%  | increasing** | 2.0%  | increasing** | 1.4%  | increasing** | 1.0%  |
|                                                     | W US  | increasing** | 6.3%  | increasing*  | 1.6%  | increasing** | 2.1%  | increasing** | 2.2%  |
|                                                     | SE US | increasing** | 5.1%  | increasing*  | 1.0%  | increasing** | 1.8%  | increasing** | 1.9%  |
| $\Delta c_{\text{SIA}}/\Delta c_{\text{SO}_4^{2-}}$ | W US  | no trend     | -0.8% | decreasing** | -5.9% | decreasing** | -3.5% | decreasing** | -3.7% |
|                                                     | C US  | no trend     | 0.8%  | decreasing** | -0.8% | decreasing*  | -0.2% | no trend     | -0.2% |
|                                                     | MW US | no trend     | 0.2%  | no trend     | -0.2% | increasing** | 0.2%  | increasing** | 0.2%  |
|                                                     | W US  | no trend     | 0.3%  | decreasing** | -0.6% | no trend     | 0.2%  | no trend     | 0.2%  |
|                                                     | SE US | no trend     | 0.4%  | decreasing** | -0.5% | no trend     | -0.1% | no trend     | 0.0%  |
| $\Delta c_{\text{SIA}}/\Delta c_{\text{NO}_3^-}$    | W US  | no trend     | 0.4%  | no trend     | 2.3%  | no trend     | -0.6% | no trend     | -0.7% |
|                                                     | C US  | no trend     | 11.5% | no trend     | 0.1%  | no trend     | 0.1%  | no trend     | 0.3%  |
|                                                     | MW US | increasing** | 9.3%  | increasing** | 1.3%  | increasing** | 1.2%  | increasing** | 1.3%  |
|                                                     | W US  | increasing** | 8.4%  | no trend     | 0.4%  | increasing*  | 1.0%  | increasing*  | 1.2%  |
|                                                     | SE US | increasing** | 8.9%  | no trend     | 0.1%  | no trend     | -0.1% | no trend     | -0.2% |
| $\Delta c_{\text{SIA}}/\Delta c_{\text{NH}_4^+}$    | W US  | decreasing** | -9.3% | no trend     | 0.2%  | decreasing** | -2.4% | decreasing** | -2.8% |
|                                                     | C US  | no trend     | -5.8% | no trend     | -1.6% | decreasing** | -2.6% | decreasing** | -3.6% |
|                                                     | MW US | no trend     | 1.3%  | no trend     | -0.6% | decreasing** | -5.2% | decreasing** | -6.2% |
|                                                     | W US  | no trend     | -0.3% | no trend     | 0.5%  | decreasing** | -3.6% | decreasing** | -3.6% |
|                                                     | SE US | no trend     | -0.8% | no trend     | 0.4%  | decreasing** | -4.0% | decreasing** | -4.1% |

**Supplementary Table 5. Literature review of studies that compared effectiveness of SO<sub>2</sub>, NO<sub>x</sub>, and NH<sub>3</sub> emission abatements on PM<sub>2.5</sub> reduction.**

| Notes:                                                                                                                                                                               |                                                         |               |                                            |                                                         |                                                                       |                                                                                                                                                                                                                                                                                                                                                                          |
|--------------------------------------------------------------------------------------------------------------------------------------------------------------------------------------|---------------------------------------------------------|---------------|--------------------------------------------|---------------------------------------------------------|-----------------------------------------------------------------------|--------------------------------------------------------------------------------------------------------------------------------------------------------------------------------------------------------------------------------------------------------------------------------------------------------------------------------------------------------------------------|
| Studies in green clearly stated that controlling NH <sub>3</sub> is the most effective way to reduce PM <sub>2.5</sub> in the regions investigated in certain seasons.               |                                                         |               |                                            |                                                         |                                                                       |                                                                                                                                                                                                                                                                                                                                                                          |
| Studies in yellow indicated that controlling NH <sub>3</sub> is more effective than controlling SO <sub>2</sub> or NO <sub>x</sub> in certain regions and certain years.             |                                                         |               |                                            |                                                         |                                                                       |                                                                                                                                                                                                                                                                                                                                                                          |
| Studies in red clearly stated that controlling SO <sub>2</sub> or NO <sub>x</sub> is more effective than controlling NH <sub>3</sub> in the regions investigated in certain seasons. |                                                         |               |                                            |                                                         |                                                                       |                                                                                                                                                                                                                                                                                                                                                                          |
| Authors (year)                                                                                                                                                                       | Method                                                  | Year analyzed | Region                                     | Species to control/most important species               | Sectors to control                                                    | Comments                                                                                                                                                                                                                                                                                                                                                                 |
| Pinder and Adams (2007) <sup>29</sup>                                                                                                                                                | Chemical transport model and cost analyses              | 2002          | LADCO                                      | NH <sub>3</sub> in winter and SO <sub>2</sub> in summer | Power, industry, transportation, and agriculture                      | Ammonia control technologies are more cost-effective than controls on SO <sub>2</sub> and NO <sub>x</sub> sources at reducing PM <sub>2.5</sub> in winter.                                                                                                                                                                                                               |
| Tsimipidi et al. (2007) <sup>30</sup>                                                                                                                                                | Chemical transport model                                | 2001 - 2002   | Eastern US                                 | SO <sub>2</sub> in summer and NH <sub>3</sub> in winter | N.A.                                                                  | A uniform 50% reduction in SO <sub>2</sub> emissions was predicted to produce an average decrease of PM <sub>2.5</sub> concentrations by 26% during July but only 6% during January. A 50% reduction of NH <sub>3</sub> emissions leads to an average 4 and 9% decrease in PM <sub>2.5</sub> in July and January, respectively.                                          |
| Schiferl et al. (2014) <sup>31</sup>                                                                                                                                                 | In-situ observation and Chemical transport model        | 2010          | Southern California and Central Valley, CA | NH <sub>3</sub>                                         | N.A.                                                                  | The simulations suggested that more than half of the inorganic PM <sub>2.5</sub> throughout California was produced because of anthropogenic NH <sub>3</sub> emissions.                                                                                                                                                                                                  |
| Lee et al. (2015) <sup>32</sup>                                                                                                                                                      | Adjoint Chemical transport model and cost analyses      | 2005          | Global                                     | SO <sub>2</sub>                                         | N.A.                                                                  | The authors found a 10% decrease in SO <sub>2</sub> emissions was the most effective source to control for reducing PM <sub>2.5</sub> -related premature mortality, but regional exceptions were large.                                                                                                                                                                  |
|                                                                                                                                                                                      |                                                         |               | North America                              | NH <sub>3</sub>                                         | N.A.                                                                  | For North America, NH <sub>3</sub> had the stronger impacts on PM <sub>2.5</sub> related premature mortality than SO <sub>2</sub> , NO <sub>x</sub> , black carbon, and organic matter.                                                                                                                                                                                  |
| Lelieveld et al. (2015) <sup>33</sup>                                                                                                                                                | Chemical transport model                                | 2010          | CONUS                                      | SO <sub>2</sub> and NH <sub>3</sub>                     | Power, transportation, agriculture, industry, residential/commercial  | The study analyzed premature mortality on a global scale. Power generation, agriculture, and land traffic contributed to 31%, 29%, and 21% of premature mortality in the CONUS.                                                                                                                                                                                          |
| Bauer et al. (2016) <sup>34</sup>                                                                                                                                                    | Climate model coupled with aerosol microphysical scheme | 2010          | CONUS                                      | NH <sub>3</sub>                                         | Agriculture                                                           | NH <sub>3</sub> contributed significantly to aerosol formation in the eastern US.                                                                                                                                                                                                                                                                                        |
|                                                                                                                                                                                      |                                                         | 2100          | CONUS                                      | NO <sub>x</sub>                                         | Combustion sources                                                    | Under a future scenario, with doubled emission of agricultural ammonia but lower combustion emission, surface nitrate aerosol concentration will decrease to a level where "agricultural" PM <sub>2.5</sub> would no longer be the dominating contribution.                                                                                                              |
| Guo et al. (2018) <sup>35</sup>                                                                                                                                                      | Thermodynamic analyses based on in-situ observations    | 2010 summer   | Southeastern U.S. (Centreville, VA)        | SO <sub>2</sub>                                         | N.A.                                                                  | Control NO <sub>3</sub> was not effective because it only contributed 4% to sulfate-nitrate-ammonium aerosols.                                                                                                                                                                                                                                                           |
|                                                                                                                                                                                      |                                                         | 2015 winter   | Northeastern US                            | NH <sub>3</sub>                                         | N.A.                                                                  | PM response to NO <sub>3</sub> <sup>-</sup> and SO <sub>4</sub> <sup>2-</sup> reductions were equal in 2015 winter.                                                                                                                                                                                                                                                      |
|                                                                                                                                                                                      |                                                         | 2010 summer   | Pasadena, CA                               | NH <sub>3</sub>                                         | N.A.                                                                  | Effectiveness of NO <sub>3</sub> <sup>-</sup> reduction followed closely to that of NH <sub>4</sub> <sup>+</sup> reduction.                                                                                                                                                                                                                                              |
| Gu et al. (2021) <sup>36</sup>                                                                                                                                                       | Chemical transport model and cost analyses              | 1990-2013     | Global                                     | NH <sub>3</sub>                                         | Agriculture                                                           | Benefit-to-cost ratios of NH <sub>3</sub> and NO <sub>x</sub> mitigation (50% reduction) were about 5 and 0.5, respectively, in 2013.                                                                                                                                                                                                                                    |
|                                                                                                                                                                                      |                                                         |               | North America                              | NH <sub>3</sub>                                         | Agriculture                                                           | Benefit-to-cost ratios of NH <sub>3</sub> and NO <sub>x</sub> mitigation (50% reduction) were about 20 and <1, respectively, in 2013.                                                                                                                                                                                                                                    |
| Henze et al. (2009) <sup>37</sup>                                                                                                                                                    | Adjoint chemical transport model                        | 2001-2002     | CONUS                                      | Vary by location and season                             | Power, industry, transportation, agricultural, commercial/residential | U.S. SO <sub>2</sub> surface and stack emissions contributed around 30% of inorganic PM <sub>2.5</sub> concentrations in 2001 - 2002. NH <sub>3</sub> anthropogenic emissions contributed 20% of inorganic PM <sub>2.5</sub> concentrations in 2001-2002. PM <sub>2.5</sub> showed the strongest response to anthropogenic NH <sub>3</sub> emissions in the mid-west US. |
| Fann et al. (2009) <sup>38</sup>                                                                                                                                                     | Reduce-formed air quality model                         | 2015          | CONUS                                      | Organic matter                                          | Power, transportation, and industry                                   | Reducing mobile NH <sub>3</sub> emissions have a larger benefit (\$/ton) in terms of PM <sub>2.5</sub> reduction than reducing SO <sub>2</sub> , NO <sub>x</sub> controls.                                                                                                                                                                                               |
| Holt et al. (2015) <sup>39</sup>                                                                                                                                                     | Chemical transport model                                | 2005          | CONUS                                      | NH <sub>3</sub>                                         | N.A.                                                                  | NH <sub>3</sub> was most sensitive in the eastern U.S. 2005.                                                                                                                                                                                                                                                                                                             |
|                                                                                                                                                                                      |                                                         | 2012          | CONUS                                      | SO <sub>2</sub> and NO <sub>x</sub>                     | N.A.                                                                  | NH <sub>3</sub> sensitivity decreased because of NO <sub>x</sub> and SO <sub>2</sub> reductions.                                                                                                                                                                                                                                                                         |
| Heo et al. (2016) <sup>40</sup>                                                                                                                                                      | Reduced-form quality model                              | 2005          | CONUS                                      | Primary PM <sub>2.5</sub>                               | Power, transportation,                                                | Social costs were \$330 billion, \$320 billion, \$210 billion, and \$160 billion for primary                                                                                                                                                                                                                                                                             |

|                                       |                                                      |               |                        |                                               |                                                             |                                                                                                                                                                                                                                                                                                                    |
|---------------------------------------|------------------------------------------------------|---------------|------------------------|-----------------------------------------------|-------------------------------------------------------------|--------------------------------------------------------------------------------------------------------------------------------------------------------------------------------------------------------------------------------------------------------------------------------------------------------------------|
|                                       |                                                      |               |                        |                                               | agriculture, and industry                                   | PM <sub>2.5</sub> , SO <sub>2</sub> , NO <sub>x</sub> , and NH <sub>3</sub> , respectively, in 2005. Emission-weighted costs were \$88000 - 130000/t PM <sub>2.5</sub> , \$14000 - 24000/t SO <sub>2</sub> , \$3800 - 14000/t NO <sub>x</sub> , and \$23000 - 66000/t NH <sub>3</sub> .                            |
| Dedoussi et al. (2020) <sup>41</sup>  | Chemical transport model analysis                    | 2005          | CONUS                  | Primary PM <sub>2.5</sub>                     | Power, industry, transportation, and commercial/residential | Premature deaths attributed to NO <sub>x</sub> , SO <sub>2</sub> , NH <sub>3</sub> , and primary PM <sub>2.5</sub> were 30000, 21000, 14400, and 34800, respectively, in 2005. These estimates include health impacts of PM <sub>2.5</sub> and ozone. The authors did not specifically analyze agriculture sector. |
|                                       |                                                      | 2011          | CONUS                  | Primary PM <sub>2.5</sub>                     | Power, industry, transportation, and commercial/residential | Premature deaths attributed to primary NO <sub>x</sub> , SO <sub>2</sub> , NH <sub>3</sub> , and primary PM <sub>2.5</sub> were 28600, 9900, 16700, and 31000, respectively, in 2011.                                                                                                                              |
|                                       |                                                      | 2018          | CONUS                  | Primary PM <sub>2.5</sub>                     | Power, industry, transportation, and commercial/residential | Premature deaths attributed to primary NO <sub>x</sub> , SO <sub>2</sub> , NH <sub>3</sub> , and primary PM <sub>2.5</sub> were 19600, 4300, 17400, and 30200, respectively, in 2018.                                                                                                                              |
| Stanier et al. (2012) <sup>42</sup>   | Composition analysis                                 | 2008 - 2009   | LADCO                  | NO <sub>x</sub>                               | N.A.                                                        | Gas ratio was calculated and indicate the region was NO <sub>x</sub> limited for NH <sub>4</sub> NO <sub>3</sub> formation.                                                                                                                                                                                        |
| Brewer and Moore (2009) <sup>43</sup> | Composition and chemical transport model analyses    | 2002 and 2018 | WRAP and SESARM        | SO <sub>2</sub> and NO <sub>x</sub>           | Power and transportation                                    | SO <sub>2</sub> emission reductions from electric generation units were most effective way to reduce visibility impairment in the two regions.                                                                                                                                                                     |
| Chen et al. (2014) <sup>44</sup>      | Chemical transport model analysis                    | 2007, 2019    | San Joaquin Valley, CA | Primary PM <sub>2.5</sub> and NO <sub>x</sub> | N.A.                                                        | 50% reductions of primary PM <sub>2.5</sub> and NO <sub>x</sub> emissions in SJV could lead to 27% and 24% decreases in PM <sub>2.5</sub> . 50% reductions of NH <sub>3</sub> only could lead to 4% decrease in PM <sub>2.5</sub> .                                                                                |
| Cheng and Li (2019) <sup>45</sup>     | Thermodynamic analysis based on in-situ observations | 2002-2004     | North Carolina         | SO <sub>2</sub> and NO <sub>x</sub>           | N.A.                                                        | North Carolina was determined to be NH <sub>3</sub> -rich. PM <sub>2.5</sub> was insensitive to total NH <sub>4</sub> <sup>+</sup> .                                                                                                                                                                               |

**Supplementary Table 6. Annual and December NH<sub>3</sub> emissions in 2017 in different regions from all sources and agricultural sources.** Ammonia emissions are obtained from the EQUATES project<sup>2</sup>.

| NH <sub>3</sub> Emissions<br>(ton km <sup>-2</sup> yr <sup>-1</sup> ) | All sources |          | Agricultural sources |          |
|-----------------------------------------------------------------------|-------------|----------|----------------------|----------|
|                                                                       | Annual      | December | Annual               | December |
| Western US                                                            | 0.36        | 0.13     | 0.25                 | 0.10     |
| Central US                                                            | 0.81        | 0.31     | 0.64                 | 0.23     |
| Midwestern US                                                         | 0.73        | 0.25     | 0.55                 | 0.20     |
| Northeastern US                                                       | 0.35        | 0.18     | 0.24                 | 0.08     |
| Southeastern US                                                       | 0.63        | 0.34     | 0.44                 | 0.18     |

**Supplementary Table 7. Potential biases, precisions, and detection limits of observations from different monitoring networks.**

| Species                       | Network | Temporal resolution | Bias | Precision | Detection limit                                                                                                                                      | Note                                                                                                                                                                                                                                                            |
|-------------------------------|---------|---------------------|------|-----------|------------------------------------------------------------------------------------------------------------------------------------------------------|-----------------------------------------------------------------------------------------------------------------------------------------------------------------------------------------------------------------------------------------------------------------|
| NH <sub>4</sub> <sup>+</sup>  | CASTNET | Weekly              | 0    | 3%        | 0.5 µg filter <sup>-1</sup>                                                                                                                          | Detection limits for concentration measurements (µg m <sup>-3</sup> ) are calculated as filter detection limits (µg filter <sup>-1</sup> ) divided by flow volume.                                                                                              |
| Na <sup>+</sup>               | CASTNET | Weekly              | 0    | 100%      | 0.125 µg filter <sup>-1</sup>                                                                                                                        |                                                                                                                                                                                                                                                                 |
| K <sup>+</sup>                | CASTNET | Weekly              | 0    | 100%      | 0.15 µg filter <sup>-1</sup>                                                                                                                         |                                                                                                                                                                                                                                                                 |
| Mg <sup>2+</sup>              | CASTNET | Weekly              | 0    | 100%      | 0.075 µg filter <sup>-1</sup>                                                                                                                        |                                                                                                                                                                                                                                                                 |
| Ca <sup>2+</sup>              | CASTNET | Weekly              | 0    | 100%      | 0.15 µg filter <sup>-1</sup>                                                                                                                         |                                                                                                                                                                                                                                                                 |
| SO <sub>4</sub> <sup>2-</sup> | CASTNET | Weekly              | 0    | 3%        | 1.0 µg filter <sup>-1</sup>                                                                                                                          |                                                                                                                                                                                                                                                                 |
| NO <sub>3</sub> <sup>-</sup>  | CASTNET | Weekly              | -10% | 5%        | 0.2 µg filter <sup>-1</sup>                                                                                                                          | Precision of Na <sup>+</sup> , K <sup>+</sup> , Mg <sup>2+</sup> , Ca <sup>2+</sup> are increased to 100% to capture the uncertainties introduced by scaling raw CASTNET observations.                                                                          |
| Cl <sup>-</sup>               | CASTNET | Weekly              | 0    | 50%       | 0.5 µg filter <sup>-1</sup>                                                                                                                          |                                                                                                                                                                                                                                                                 |
| HNO <sub>3</sub>              | CASTNET | Weekly              | 10%  | 5%        | 0.2 µg filter <sup>-1</sup>                                                                                                                          |                                                                                                                                                                                                                                                                 |
| NH <sub>3</sub>               | AMoN    | Biweekly            | -10% | 5%        | <6/2018: 0.047 mg L <sup>-1</sup> ;<br>2018/6-12: 0.119 mg L <sup>-1</sup> ;<br>2019: 0.104 mg L <sup>-1</sup> ;<br>2020: 0.083 mg L <sup>-1</sup> . | To derive the detection limit of NH <sub>3</sub> concentration (µg m <sup>-3</sup> ), the solution detection limit is scaled by the ratio of the reported gas concentration (µg m <sup>-3</sup> ) to the reported solution concentration (mg L <sup>-1</sup> ). |
| T                             | CASTNET | Hourly              | 0    | 1 °C      | NA                                                                                                                                                   | ISD and NARR precisions are determined based on the intercomparison of meteorological observations.                                                                                                                                                             |
|                               | ISD     | Hourly              | 0    | 2 °C      | NA                                                                                                                                                   |                                                                                                                                                                                                                                                                 |
|                               | NARR    | Every three hours   | 0    | 4 °C      | NA                                                                                                                                                   |                                                                                                                                                                                                                                                                 |
| RH                            | CASTNET | Hourly              | 0    | 5%        | NA                                                                                                                                                   |                                                                                                                                                                                                                                                                 |
|                               | ISD     | Hourly              | 0    | 8%        | NA                                                                                                                                                   |                                                                                                                                                                                                                                                                 |
|                               | NARR    | Every three hours   | 0    | 18%       | NA                                                                                                                                                   |                                                                                                                                                                                                                                                                 |

**Supplementary Table 8. Intercomparison of data from CASTNET, IMPROVE, CSN, ISD, and NARR at different spatial windows.** Hourly meteorological observations from CASTNET and ISD are averaged down to three-hour to match the time resolution of NARR. For chemical compounds, observations are averaged weekly to match the temporal resolution of CASTNET. m and b are the slopes and intercepts of orthogonal distance regressions (ODRs), and  $\delta_m$  and  $\delta_b$  are their uncertainties (95% CI defined as  $\pm 1.96SD$ ), respectively.

| Network 1 (x) | Network 2 (y) | Variable                      | Distance | m     | $\delta_m$ | b      | $\delta_b$ | R <sup>2</sup> | NMB    | RMSE  | Sample # |
|---------------|---------------|-------------------------------|----------|-------|------------|--------|------------|----------------|--------|-------|----------|
| CASTNET       | ISD           | T                             | <10      | 0.994 | 0.001      | 1.53   | 0.19       | 0.98           | 0.1%   | 1.36  | 40187    |
| CASTNET       | ISD           | T                             | 10-30    | 1.018 | 0.000      | -4.94  | 0.07       | 0.98           | -0.1%  | 1.64  | 300406   |
| CASTNET       | ISD           | T                             | 30-50    | 1.022 | 0.001      | -6.58  | 0.18       | 0.98           | 0.1%   | 1.65  | 50607    |
| CASTNET       | ISD           | T                             | 50-100   | 1.039 | 0.004      | -11.66 | 1.20       | 0.76           | 0.1%   | 4.83  | 17198    |
| CASTNET       | ISD           | RH                            | <10      | 0.962 | 0.002      | 3.12   | 0.14       | 0.86           | -0.6%  | 8.07  | 40187    |
| CASTNET       | ISD           | RH                            | 10-30    | 0.956 | 0.001      | 2.47   | 0.06       | 0.80           | 0.9%   | 9.34  | 300406   |
| CASTNET       | ISD           | RH                            | 30-50    | 0.940 | 0.002      | 4.18   | 0.14       | 0.83           | 0.3%   | 8.17  | 50607    |
| CASTNET       | ISD           | RH                            | 50-100   | 1.161 | 0.011      | -11.13 | 0.80       | 0.19           | -0.3%  | 22.43 | 17198    |
| CASTNET       | NARR          | T                             | <10      | 1.037 | 0.001      | -10.60 | 0.30       | 0.76           | 0.0%   | 5.58  | 266095   |
| CASTNET       | NARR          | T                             | 10-30    | 1.065 | 0.001      | -18.70 | 0.17       | 0.74           | 0.1%   | 6.03  | 1032506  |
| CASTNET       | NARR          | RH                            | <10      | 0.880 | 0.002      | 10.75  | 0.15       | 0.21           | -3.3%  | 21.62 | 266095   |
| CASTNET       | NARR          | RH                            | 10-30    | 0.935 | 0.001      | 7.04   | 0.06       | 0.34           | -4.3%  | 21.03 | 1032506  |
| ISD           | NARR          | T                             | <10      | 1.007 | 0.000      | -1.85  | 0.11       | 0.94           | -0.1%  | 3.02  | 457431   |
| ISD           | NARR          | T                             | 10-30    | 1.001 | 0.000      | 0.11   | 0.07       | 0.93           | -0.2%  | 3.08  | 1067370  |
| ISD           | NARR          | RH                            | <10      | 0.831 | 0.001      | 16.06  | 0.08       | 0.46           | -5.3%  | 14.99 | 457431   |
| ISD           | NARR          | RH                            | 10-30    | 0.825 | 0.001      | 16.12  | 0.05       | 0.45           | -4.7%  | 15.03 | 1067370  |
| IMPROVE       | CASTNET       | NH <sub>4</sub> <sup>+</sup>  | <10      | 0.96  | 0.01       | -0.06  | 0.00       | 0.85           | 16.9%  | 0.19  | 3659     |
| IMPROVE       | CASTNET       | NH <sub>4</sub> <sup>+</sup>  | 10-30    | 0.85  | 0.03       | -0.01  | 0.03       | 0.78           | 19.5%  | 0.28  | 172      |
| IMPROVE       | CASTNET       | NH <sub>4</sub> <sup>+</sup>  | 30-50    | 0.96  | 0.02       | -0.05  | 0.01       | 0.81           | 14.5%  | 0.16  | 548      |
| IMPROVE       | CASTNET       | NH <sub>4</sub> <sup>+</sup>  | 50-100   | 0.82  | 0.02       | -0.07  | 0.01       | 0.74           | 47.2%  | 0.21  | 473      |
| IMPROVE       | CASTNET       | NO <sub>3</sub> <sup>-</sup>  | <10      | 1.12  | 0.01       | 0.10   | 0.01       | 0.84           | -23.0% | 0.40  | 3659     |
| IMPROVE       | CASTNET       | NO <sub>3</sub> <sup>-</sup>  | 10-30    | 0.87  | 0.04       | -0.01  | 0.04       | 0.74           | 16.4%  | 0.44  | 172      |
| IMPROVE       | CASTNET       | NO <sub>3</sub> <sup>-</sup>  | 30-50    | 1.10  | 0.03       | -0.07  | 0.02       | 0.68           | 6.6%   | 0.26  | 548      |
| IMPROVE       | CASTNET       | NO <sub>3</sub> <sup>-</sup>  | 50-100   | 1.25  | 0.04       | -0.05  | 0.02       | 0.65           | -9.9%  | 0.29  | 473      |
| IMPROVE       | CASTNET       | SO <sub>4</sub> <sup>2-</sup> | <10      | 1.09  | 0.01       | 0.07   | 0.01       | 0.92           | -13.3% | 0.31  | 3659     |
| IMPROVE       | CASTNET       | SO <sub>4</sub> <sup>2-</sup> | 10-30    | 1.18  | 0.04       | -0.08  | 0.07       | 0.84           | -11.5% | 0.53  | 172      |
| IMPROVE       | CASTNET       | SO <sub>4</sub> <sup>2-</sup> | 30-50    | 1.11  | 0.02       | -0.02  | 0.03       | 0.87           | -8.0%  | 0.34  | 548      |
| IMPROVE       | CASTNET       | SO <sub>4</sub> <sup>2-</sup> | 50-100   | 0.86  | 0.02       | 0.12   | 0.02       | 0.84           | 2.4%   | 0.25  | 473      |
| CSN           | CASTNET       | NH <sub>4</sub> <sup>+</sup>  | <10      | 1.09  | 0.06       | 0.16   | 0.02       | 0.55           | -36.2% | 0.27  | 208      |
| CSN           | CASTNET       | NH <sub>4</sub> <sup>+</sup>  | 30-50    | 1.03  | 0.03       | 0.10   | 0.02       | 0.67           | -21.6% | 0.23  | 510      |
| CSN           | CASTNET       | NH <sub>4</sub> <sup>+</sup>  | 50-100   | 1.08  | 0.02       | 0.12   | 0.01       | 0.65           | -30.0% | 0.23  | 1678     |
| CSN           | CASTNET       | NO <sub>3</sub> <sup>-</sup>  | <10      | 1.09  | 0.05       | 0.09   | 0.05       | 0.67           | -16.6% | 0.53  | 208      |
| CSN           | CASTNET       | NO <sub>3</sub> <sup>-</sup>  | 30-50    | 0.97  | 0.02       | -0.03  | 0.03       | 0.80           | 6.1%   | 0.49  | 510      |
| CSN           | CASTNET       | NO <sub>3</sub> <sup>-</sup>  | 50-100   | 1.05  | 0.01       | 0.04   | 0.02       | 0.76           | -9.6%  | 0.48  | 1678     |
| CSN           | CASTNET       | SO <sub>4</sub> <sup>2-</sup> | <10      | 0.74  | 0.05       | 0.38   | 0.05       | 0.44           | -11.1% | 0.30  | 208      |
| CSN           | CASTNET       | SO <sub>4</sub> <sup>2-</sup> | 30-50    | 0.87  | 0.03       | 0.21   | 0.03       | 0.64           | -6.0%  | 0.23  | 510      |
| CSN           | CASTNET       | SO <sub>4</sub> <sup>2-</sup> | 50-100   | 0.88  | 0.02       | 0.19   | 0.02       | 0.50           | -6.2%  | 0.32  | 1678     |
| CSN           | IMPROVE       | NH <sub>4</sub> <sup>+</sup>  | <10      | 0.84  | 0.06       | 0.27   | 0.05       | 0.70           | -21.7% | 0.36  | 72       |
| CSN           | IMPROVE       | NH <sub>4</sub> <sup>+</sup>  | 10-30    | 1.08  | 0.07       | 0.37   | 0.05       | 0.62           | -39.4% | 0.48  | 126      |
| CSN           | IMPROVE       | NH <sub>4</sub> <sup>+</sup>  | 30-50    | 1.60  | 0.30       | 0.25   | 0.06       | 0.42           | -67.5% | 0.38  | 26       |
| CSN           | IMPROVE       | NH <sub>4</sub> <sup>+</sup>  | 50-100   | 0.74  | 0.03       | 0.40   | 0.01       | 0.58           | -50.4% | 0.38  | 291      |
| CSN           | IMPROVE       | NO <sub>3</sub> <sup>-</sup>  | <10      | 0.74  | 0.05       | 0.09   | 0.05       | 0.73           | 15.5%  | 0.44  | 72       |
| CSN           | IMPROVE       | NO <sub>3</sub> <sup>-</sup>  | 10-30    | 1.11  | 0.04       | 0.00   | 0.05       | 0.83           | -9.7%  | 0.37  | 126      |
| CSN           | IMPROVE       | NO <sub>3</sub> <sup>-</sup>  | 30-50    | 0.97  | 0.20       | 0.03   | 0.06       | 0.36           | -7.4%  | 0.10  | 26       |
| CSN           | IMPROVE       | NO <sub>3</sub> <sup>-</sup>  | 50-100   | 0.82  | 0.02       | 0.05   | 0.02       | 0.78           | 10.3%  | 0.30  | 291      |
| CSN           | IMPROVE       | SO <sub>4</sub> <sup>2-</sup> | <10      | 0.92  | 0.06       | 0.03   | 0.12       | 0.77           | 6.6%   | 0.59  | 72       |
| CSN           | IMPROVE       | SO <sub>4</sub> <sup>2-</sup> | 10-30    | 1.05  | 0.05       | 0.01   | 0.11       | 0.73           | -5.3%  | 0.41  | 126      |
| CSN           | IMPROVE       | SO <sub>4</sub> <sup>2-</sup> | 30-50    | 1.03  | 0.15       | 0.02   | 0.17       | 0.62           | -4.2%  | 0.27  | 26       |
| CSN           | IMPROVE       | SO <sub>4</sub> <sup>2-</sup> | 50-100   | 0.73  | 0.04       | 0.30   | 0.05       | 0.47           | 4.9%   | 0.48  | 291      |

**Supplementary Table 9. Observed and simulated annual  $\epsilon_{\text{NH}_4^+}$ .** “W US”, “C US”, “MW US”, “NE US”, “SE US” stand for the Western, Central, Midwestern, Northeastern, Southeastern US, respectively. The 25<sup>th</sup> and 75<sup>th</sup> percentiles of annual  $\epsilon_{\text{NH}_4^+}$  from the sites within the corresponding region show its regional variability. Uncertainty lower and upper bounds are the mean uncertainties (95% CI defined as the 2.5<sup>th</sup> and the 97.5<sup>th</sup> percentiles) of the sites within the region. Uncertainties of each site are calculated from 1000 Monte Carlo simulations based on the precisions and detection limits shown in Supplementary Table 7.

| Region          | Year | Observed annual $\epsilon_{\text{NH}_4^+}$ |                             |                             |                         |                         | Simulated annual $\epsilon_{\text{NH}_4^+}$ |                             |                             |                         |                         |
|-----------------|------|--------------------------------------------|-----------------------------|-----------------------------|-------------------------|-------------------------|---------------------------------------------|-----------------------------|-----------------------------|-------------------------|-------------------------|
|                 |      | Median                                     | 25 <sup>th</sup> percentile | 75 <sup>th</sup> percentile | Uncertainty lower bound | Uncertainty upper bound | Median                                      | 25 <sup>th</sup> percentile | 75 <sup>th</sup> percentile | Uncertainty lower bound | Uncertainty upper bound |
| W US (WRAP)     | 2011 | 0.34                                       | 0.39                        | 0.30                        | -0.03                   | 0.03                    | 0.29                                        | 0.26                        | 0.34                        | -0.03                   | 0.04                    |
|                 | 2012 | 0.26                                       | 0.33                        | 0.28                        | -0.03                   | 0.03                    | 0.25                                        | 0.23                        | 0.26                        | -0.02                   | 0.03                    |
|                 | 2013 | 0.20                                       | 0.26                        | 0.25                        | -0.03                   | 0.03                    | 0.19                                        | 0.18                        | 0.31                        | -0.02                   | 0.03                    |
|                 | 2014 | 0.15                                       | 0.25                        | 0.25                        | -0.03                   | 0.03                    | 0.18                                        | 0.13                        | 0.25                        | -0.03                   | 0.03                    |
|                 | 2015 | 0.17                                       | 0.28                        | 0.27                        | -0.04                   | 0.03                    | 0.23                                        | 0.15                        | 0.30                        | -0.03                   | 0.04                    |
|                 | 2016 | 0.18                                       | 0.26                        | 0.29                        | -0.04                   | 0.03                    | 0.19                                        | 0.16                        | 0.27                        | -0.03                   | 0.04                    |
|                 | 2017 | 0.19                                       | 0.26                        | 0.33                        | -0.03                   | 0.03                    | 0.20                                        | 0.15                        | 0.26                        | -0.03                   | 0.05                    |
|                 | 2018 | 0.15                                       | 0.25                        | 0.38                        | -0.04                   | 0.04                    | 0.16                                        | 0.11                        | 0.25                        | -0.04                   | 0.06                    |
|                 | 2019 | 0.18                                       | 0.30                        | 0.42                        | -0.03                   | 0.03                    | 0.25                                        | 0.15                        | 0.32                        | -0.04                   | 0.06                    |
|                 | 2020 | 0.18                                       | 0.24                        | 0.56                        | -0.14                   | 0.10                    | 0.19                                        | 0.13                        | 0.23                        | -0.06                   | 0.16                    |
| C US (CENSARA)  | 2011 | 0.48                                       | 0.61                        | 0.30                        | -0.01                   | 0.01                    | 0.57                                        | 0.51                        | 0.65                        | -0.04                   | 0.04                    |
|                 | 2012 | 0.38                                       | 0.51                        | 0.28                        | -0.01                   | 0.01                    | 0.47                                        | 0.41                        | 0.55                        | -0.03                   | 0.03                    |
|                 | 2013 | 0.34                                       | 0.44                        | 0.25                        | -0.01                   | 0.01                    | 0.43                                        | 0.38                        | 0.50                        | -0.03                   | 0.03                    |
|                 | 2014 | 0.23                                       | 0.36                        | 0.25                        | -0.01                   | 0.01                    | 0.33                                        | 0.27                        | 0.42                        | -0.03                   | 0.03                    |
|                 | 2015 | 0.20                                       | 0.42                        | 0.27                        | -0.01                   | 0.01                    | 0.32                                        | 0.24                        | 0.51                        | -0.03                   | 0.03                    |
|                 | 2016 | 0.18                                       | 0.39                        | 0.29                        | -0.01                   | 0.01                    | 0.28                                        | 0.21                        | 0.47                        | -0.03                   | 0.03                    |
|                 | 2017 | 0.15                                       | 0.36                        | 0.33                        | -0.01                   | 0.01                    | 0.27                                        | 0.19                        | 0.43                        | -0.03                   | 0.04                    |
|                 | 2018 | 0.15                                       | 0.37                        | 0.38                        | -0.01                   | 0.01                    | 0.24                                        | 0.19                        | 0.42                        | -0.04                   | 0.05                    |
|                 | 2019 | 0.15                                       | 0.43                        | 0.42                        | -0.01                   | 0.01                    | 0.28                                        | 0.18                        | 0.48                        | -0.04                   | 0.05                    |
|                 | 2020 | 0.14                                       | 0.37                        | 0.56                        | -0.01                   | 0.01                    | 0.23                                        | 0.16                        | 0.34                        | -0.04                   | 0.07                    |
| MW US (LADCO)   | 2011 | 0.50                                       | 0.68                        | 0.30                        | -0.01                   | 0.01                    | 0.59                                        | 0.50                        | 0.72                        | -0.03                   | 0.03                    |
|                 | 2012 | 0.45                                       | 0.50                        | 0.28                        | -0.01                   | 0.01                    | 0.51                                        | 0.49                        | 0.55                        | -0.02                   | 0.02                    |
|                 | 2013 | 0.42                                       | 0.50                        | 0.25                        | -0.01                   | 0.01                    | 0.49                                        | 0.47                        | 0.55                        | -0.02                   | 0.02                    |
|                 | 2014 | 0.39                                       | 0.48                        | 0.25                        | -0.01                   | 0.01                    | 0.45                                        | 0.44                        | 0.53                        | -0.03                   | 0.03                    |
|                 | 2015 | 0.33                                       | 0.48                        | 0.27                        | -0.01                   | 0.01                    | 0.42                                        | 0.38                        | 0.54                        | -0.02                   | 0.02                    |
|                 | 2016 | 0.30                                       | 0.41                        | 0.29                        | -0.01                   | 0.01                    | 0.38                                        | 0.36                        | 0.47                        | -0.02                   | 0.02                    |
|                 | 2017 | 0.26                                       | 0.39                        | 0.33                        | -0.01                   | 0.01                    | 0.37                                        | 0.30                        | 0.43                        | -0.03                   | 0.03                    |
|                 | 2018 | 0.31                                       | 0.43                        | 0.38                        | -0.01                   | 0.01                    | 0.39                                        | 0.33                        | 0.47                        | -0.03                   | 0.04                    |
|                 | 2019 | 0.31                                       | 0.42                        | 0.42                        | -0.01                   | 0.01                    | 0.38                                        | 0.33                        | 0.46                        | -0.03                   | 0.04                    |
|                 | 2020 | 0.27                                       | 0.37                        | 0.56                        | -0.01                   | 0.01                    | 0.33                                        | 0.30                        | 0.41                        | -0.06                   | 0.07                    |
| NE US (MANE-VU) | 2011 | 0.68                                       | 0.78                        | 0.30                        | -0.02                   | 0.02                    | 0.79                                        | 0.75                        | 0.84                        | -0.04                   | 0.04                    |
|                 | 2012 | 0.59                                       | 0.70                        | 0.28                        | -0.02                   | 0.02                    | 0.72                                        | 0.61                        | 0.82                        | -0.04                   | 0.04                    |
|                 | 2013 | 0.52                                       | 0.58                        | 0.25                        | -0.02                   | 0.02                    | 0.61                                        | 0.59                        | 0.66                        | -0.03                   | 0.03                    |
|                 | 2014 | 0.49                                       | 0.60                        | 0.25                        | -0.02                   | 0.02                    | 0.59                                        | 0.55                        | 0.67                        | -0.03                   | 0.03                    |
|                 | 2015 | 0.40                                       | 0.58                        | 0.27                        | -0.02                   | 0.02                    | 0.59                                        | 0.45                        | 0.64                        | -0.03                   | 0.04                    |
|                 | 2016 | 0.35                                       | 0.51                        | 0.29                        | -0.02                   | 0.02                    | 0.50                                        | 0.40                        | 0.58                        | -0.03                   | 0.04                    |
|                 | 2017 | 0.35                                       | 0.48                        | 0.33                        | -0.02                   | 0.02                    | 0.48                                        | 0.35                        | 0.55                        | -0.05                   | 0.06                    |
|                 | 2018 | 0.38                                       | 0.52                        | 0.38                        | -0.03                   | 0.02                    | 0.51                                        | 0.41                        | 0.61                        | -0.06                   | 0.08                    |
|                 | 2019 | 0.39                                       | 0.51                        | 0.42                        | -0.02                   | 0.02                    | 0.52                                        | 0.41                        | 0.57                        | -0.06                   | 0.07                    |
|                 | 2020 | 0.31                                       | 0.50                        | 0.56                        | -0.02                   | 0.02                    | 0.47                                        | 0.36                        | 0.52                        | -0.13                   | 0.11                    |
| SE US (SESARM)  | 2011 | 0.47                                       | 0.73                        | 0.30                        | -0.01                   | 0.01                    | 0.68                                        | 0.47                        | 0.78                        | -0.04                   | 0.04                    |
|                 | 2012 | 0.45                                       | 0.57                        | 0.28                        | -0.02                   | 0.02                    | 0.58                                        | 0.39                        | 0.68                        | -0.03                   | 0.03                    |
|                 | 2013 | 0.35                                       | 0.51                        | 0.25                        | -0.02                   | 0.02                    | 0.54                                        | 0.30                        | 0.58                        | -0.03                   | 0.03                    |
|                 | 2014 | 0.34                                       | 0.48                        | 0.25                        | -0.02                   | 0.02                    | 0.52                                        | 0.32                        | 0.58                        | -0.03                   | 0.04                    |
|                 | 2015 | 0.33                                       | 0.48                        | 0.27                        | -0.02                   | 0.02                    | 0.47                                        | 0.36                        | 0.56                        | -0.03                   | 0.03                    |
|                 | 2016 | 0.30                                       | 0.46                        | 0.29                        | -0.02                   | 0.02                    | 0.42                                        | 0.32                        | 0.47                        | -0.03                   | 0.03                    |
|                 | 2017 | 0.27                                       | 0.43                        | 0.33                        | -0.02                   | 0.02                    | 0.41                                        | 0.26                        | 0.44                        | -0.04                   | 0.05                    |
|                 | 2018 | 0.29                                       | 0.46                        | 0.38                        | -0.02                   | 0.02                    | 0.43                                        | 0.28                        | 0.50                        | -0.05                   | 0.06                    |
|                 | 2019 | 0.28                                       | 0.42                        | 0.42                        | -0.02                   | 0.02                    | 0.40                                        | 0.26                        | 0.46                        | -0.05                   | 0.06                    |
|                 | 2020 | 0.26                                       | 0.42                        | 0.56                        | -0.02                   | 0.02                    | 0.36                                        | 0.27                        | 0.43                        | -0.09                   | 0.11                    |

**Supplementary Table 10. Observed and simulated annual  $\epsilon_{\text{NO}_3^-}$ .** “W US”, “C US”, “MW US”, “NE US”, “SE US” stand for the Western, Central, Midwestern, Northeastern, Southeastern US, respectively. The 25<sup>th</sup> and 75<sup>th</sup> percentiles of annual  $\epsilon_{\text{NO}_3^-}$  from the sites within the corresponding region show its regional variability. Uncertainty lower and upper bounds are the mean uncertainties (95% CI, defined as the 2.5<sup>th</sup> and the 97.5<sup>th</sup> percentiles) of the sites within the region. Uncertainties of each site are calculated from 1000 Monte Carlo simulations based on the precisions and detection limits shown in Supplementary Table 7.

| Region          | Year | Observed annual $\epsilon_{\text{NO}_3^-}$ |                             |                             |                         |                         | Simulated annual $\epsilon_{\text{NO}_3^-}$ |                             |                             |                         |                         |
|-----------------|------|--------------------------------------------|-----------------------------|-----------------------------|-------------------------|-------------------------|---------------------------------------------|-----------------------------|-----------------------------|-------------------------|-------------------------|
|                 |      | Median                                     | 25 <sup>th</sup> percentile | 75 <sup>th</sup> percentile | Uncertainty lower bound | Uncertainty upper bound | Median                                      | 25 <sup>th</sup> percentile | 75 <sup>th</sup> percentile | Uncertainty lower bound | Uncertainty upper bound |
| W US (WRAP)     | 2011 | 0.40                                       | 0.33                        | 0.42                        | -0.03                   | 0.04                    | 0.19                                        | 0.12                        | 0.20                        | -0.04                   | 0.05                    |
|                 | 2012 | 0.37                                       | 0.34                        | 0.39                        | -0.02                   | 0.03                    | 0.22                                        | 0.16                        | 0.32                        | -0.04                   | 0.04                    |
|                 | 2013 | 0.37                                       | 0.36                        | 0.42                        | -0.02                   | 0.03                    | 0.34                                        | 0.19                        | 0.43                        | -0.05                   | 0.07                    |
|                 | 2014 | 0.37                                       | 0.35                        | 0.41                        | -0.03                   | 0.03                    | 0.25                                        | 0.13                        | 0.38                        | -0.04                   | 0.05                    |
|                 | 2015 | 0.37                                       | 0.34                        | 0.40                        | -0.03                   | 0.04                    | 0.30                                        | 0.21                        | 0.33                        | -0.06                   | 0.09                    |
|                 | 2016 | 0.37                                       | 0.35                        | 0.41                        | -0.03                   | 0.03                    | 0.30                                        | 0.17                        | 0.33                        | -0.07                   | 0.10                    |
|                 | 2017 | 0.35                                       | 0.33                        | 0.42                        | -0.04                   | 0.06                    | 0.32                                        | 0.20                        | 0.36                        | -0.14                   | 0.14                    |
|                 | 2018 | 0.39                                       | 0.38                        | 0.45                        | -0.05                   | 0.09                    | 0.31                                        | 0.21                        | 0.33                        | -0.07                   | 0.08                    |
|                 | 2019 | 0.36                                       | 0.34                        | 0.39                        | -0.05                   | 0.08                    | 0.32                                        | 0.20                        | 0.38                        | -0.15                   | 0.11                    |
|                 | 2020 | 0.38                                       | 0.38                        | 0.40                        | -0.08                   | 0.31                    | 0.33                                        | 0.19                        | 0.36                        | -0.16                   | 0.20                    |
| C US (CENSARA)  | 2011 | 0.50                                       | 0.41                        | 0.53                        | -0.02                   | 0.02                    | 0.32                                        | 0.29                        | 0.38                        | -0.02                   | 0.02                    |
|                 | 2012 | 0.49                                       | 0.42                        | 0.53                        | -0.02                   | 0.02                    | 0.35                                        | 0.29                        | 0.36                        | -0.02                   | 0.02                    |
|                 | 2013 | 0.51                                       | 0.42                        | 0.58                        | -0.01                   | 0.01                    | 0.46                                        | 0.41                        | 0.49                        | -0.02                   | 0.02                    |
|                 | 2014 | 0.61                                       | 0.50                        | 0.69                        | -0.02                   | 0.02                    | 0.51                                        | 0.50                        | 0.52                        | -0.02                   | 0.04                    |
|                 | 2015 | 0.56                                       | 0.46                        | 0.67                        | -0.02                   | 0.02                    | 0.47                                        | 0.42                        | 0.52                        | -0.02                   | 0.03                    |
|                 | 2016 | 0.57                                       | 0.49                        | 0.67                        | -0.01                   | 0.02                    | 0.43                                        | 0.40                        | 0.49                        | -0.02                   | 0.03                    |
|                 | 2017 | 0.58                                       | 0.44                        | 0.69                        | -0.03                   | 0.04                    | 0.42                                        | 0.38                        | 0.52                        | -0.03                   | 0.03                    |
|                 | 2018 | 0.61                                       | 0.50                        | 0.66                        | -0.04                   | 0.05                    | 0.45                                        | 0.38                        | 0.57                        | -0.05                   | 0.04                    |
|                 | 2019 | 0.60                                       | 0.52                        | 0.69                        | -0.04                   | 0.05                    | 0.50                                        | 0.44                        | 0.56                        | -0.05                   | 0.04                    |
|                 | 2020 | 0.60                                       | 0.54                        | 0.68                        | -0.05                   | 0.09                    | 0.45                                        | 0.35                        | 0.54                        | -0.04                   | 0.05                    |
| MW US (LADCO)   | 2011 | 0.52                                       | 0.49                        | 0.55                        | -0.02                   | 0.02                    | 0.49                                        | 0.44                        | 0.53                        | -0.02                   | 0.02                    |
|                 | 2012 | 0.57                                       | 0.48                        | 0.58                        | -0.02                   | 0.02                    | 0.53                                        | 0.51                        | 0.55                        | -0.01                   | 0.01                    |
|                 | 2013 | 0.57                                       | 0.52                        | 0.62                        | -0.01                   | 0.01                    | 0.67                                        | 0.62                        | 0.68                        | -0.01                   | 0.01                    |
|                 | 2014 | 0.57                                       | 0.51                        | 0.63                        | -0.02                   | 0.02                    | 0.67                                        | 0.63                        | 0.68                        | -0.02                   | 0.02                    |
|                 | 2015 | 0.50                                       | 0.48                        | 0.56                        | -0.02                   | 0.02                    | 0.57                                        | 0.54                        | 0.63                        | -0.02                   | 0.02                    |
|                 | 2016 | 0.53                                       | 0.50                        | 0.56                        | -0.02                   | 0.02                    | 0.56                                        | 0.53                        | 0.64                        | -0.03                   | 0.03                    |
|                 | 2017 | 0.55                                       | 0.49                        | 0.57                        | -0.02                   | 0.03                    | 0.57                                        | 0.54                        | 0.64                        | -0.03                   | 0.02                    |
|                 | 2018 | 0.59                                       | 0.53                        | 0.61                        | -0.03                   | 0.04                    | 0.60                                        | 0.58                        | 0.67                        | -0.03                   | 0.03                    |
|                 | 2019 | 0.60                                       | 0.52                        | 0.63                        | -0.03                   | 0.04                    | 0.59                                        | 0.56                        | 0.65                        | -0.04                   | 0.04                    |
|                 | 2020 | 0.57                                       | 0.50                        | 0.58                        | -0.06                   | 0.08                    | 0.58                                        | 0.53                        | 0.60                        | -0.03                   | 0.01                    |
| NE US (MANE-VU) | 2011 | 0.37                                       | 0.30                        | 0.38                        | -0.04                   | 0.05                    | 0.43                                        | 0.36                        | 0.43                        | -0.04                   | 0.03                    |
|                 | 2012 | 0.41                                       | 0.34                        | 0.45                        | -0.03                   | 0.04                    | 0.43                                        | 0.39                        | 0.50                        | -0.04                   | 0.03                    |
|                 | 2013 | 0.40                                       | 0.38                        | 0.44                        | -0.03                   | 0.03                    | 0.51                                        | 0.46                        | 0.53                        | -0.04                   | 0.03                    |
|                 | 2014 | 0.42                                       | 0.41                        | 0.46                        | -0.03                   | 0.04                    | 0.52                                        | 0.49                        | 0.57                        | -0.04                   | 0.03                    |
|                 | 2015 | 0.41                                       | 0.38                        | 0.45                        | -0.03                   | 0.04                    | 0.47                                        | 0.41                        | 0.50                        | -0.04                   | 0.03                    |
|                 | 2016 | 0.42                                       | 0.39                        | 0.45                        | -0.03                   | 0.04                    | 0.43                                        | 0.42                        | 0.49                        | -0.03                   | 0.03                    |
|                 | 2017 | 0.44                                       | 0.42                        | 0.47                        | -0.06                   | 0.08                    | 0.50                                        | 0.45                        | 0.57                        | -0.05                   | 0.05                    |
|                 | 2018 | 0.48                                       | 0.44                        | 0.51                        | -0.08                   | 0.11                    | 0.53                                        | 0.44                        | 0.57                        | -0.07                   | 0.05                    |
|                 | 2019 | 0.48                                       | 0.45                        | 0.51                        | -0.07                   | 0.11                    | 0.47                                        | 0.44                        | 0.50                        | -0.07                   | 0.06                    |
|                 | 2020 | 0.44                                       | 0.42                        | 0.48                        | -0.14                   | 0.22                    | 0.44                                        | 0.39                        | 0.49                        | -0.16                   | 0.08                    |
| SE US (SESARM)  | 2011 | 0.31                                       | 0.27                        | 0.43                        | -0.03                   | 0.03                    | 0.29                                        | 0.22                        | 0.43                        | -0.05                   | 0.04                    |
|                 | 2012 | 0.39                                       | 0.31                        | 0.50                        | -0.02                   | 0.02                    | 0.36                                        | 0.29                        | 0.47                        | -0.04                   | 0.04                    |
|                 | 2013 | 0.41                                       | 0.33                        | 0.52                        | -0.02                   | 0.02                    | 0.46                                        | 0.38                        | 0.60                        | -0.04                   | 0.03                    |
|                 | 2014 | 0.41                                       | 0.32                        | 0.52                        | -0.03                   | 0.03                    | 0.43                                        | 0.37                        | 0.60                        | -0.04                   | 0.03                    |
|                 | 2015 | 0.39                                       | 0.34                        | 0.43                        | -0.02                   | 0.03                    | 0.41                                        | 0.33                        | 0.56                        | -0.04                   | 0.04                    |
|                 | 2016 | 0.38                                       | 0.35                        | 0.43                        | -0.02                   | 0.03                    | 0.37                                        | 0.32                        | 0.52                        | -0.05                   | 0.04                    |
|                 | 2017 | 0.40                                       | 0.37                        | 0.46                        | -0.04                   | 0.06                    | 0.38                                        | 0.33                        | 0.54                        | -0.05                   | 0.05                    |
|                 | 2018 | 0.41                                       | 0.38                        | 0.48                        | -0.06                   | 0.08                    | 0.43                                        | 0.36                        | 0.55                        | -0.06                   | 0.05                    |
|                 | 2019 | 0.39                                       | 0.35                        | 0.45                        | -0.06                   | 0.09                    | 0.35                                        | 0.32                        | 0.53                        | -0.07                   | 0.06                    |
|                 | 2020 | 0.41                                       | 0.36                        | 0.46                        | -0.12                   | 0.20                    | 0.38                                        | 0.31                        | 0.53                        | -0.12                   | 0.06                    |



**Supplementary Table 11. Simulated annual pH and aerosol water content (AWC).** “W US”, “C US”, “MW US”, “NE US”, “SE US” stand for the Western, Central, Midwestern, Northeastern, Southeastern US, respectively. The 25<sup>th</sup> and 75<sup>th</sup> percentiles of annual pH and AWC from the sites within the corresponding RPO show its regional variability. Uncertainty lower and upper bounds are the mean uncertainties (95% CI defined as the 2.5<sup>th</sup> and the 97.5<sup>th</sup> percentiles) of the sites within the RPO. Uncertainties of each site are calculated from 1000 Monte Carlo simulations based on the precisions and detection limits shown in Supplementary Table 7.

| Region          | Year | pH     |                             |                             |                         |                         | AWC    |                             |                             |                         |                         |
|-----------------|------|--------|-----------------------------|-----------------------------|-------------------------|-------------------------|--------|-----------------------------|-----------------------------|-------------------------|-------------------------|
|                 |      | Median | 25 <sup>th</sup> percentile | 75 <sup>th</sup> percentile | Uncertainty lower bound | Uncertainty upper bound | Median | 25 <sup>th</sup> percentile | 75 <sup>th</sup> percentile | Uncertainty lower bound | Uncertainty upper bound |
| W US (WRAP)     | 2011 | 1.9    | 1.9                         | 2.3                         | -0.2                    | 0.2                     | 1.2    | 0.9                         | 4.3                         | -0.2                    | 0.5                     |
|                 | 2012 | 2.1    | 2.0                         | 2.4                         | -0.1                    | 0.2                     | 0.8    | 0.7                         | 1.2                         | -0.4                    | 0.8                     |
|                 | 2013 | 2.4    | 2.2                         | 2.5                         | -0.1                    | 0.2                     | 1.0    | 0.9                         | 1.8                         | -0.3                    | 0.6                     |
|                 | 2014 | 2.4    | 2.3                         | 2.5                         | -0.1                    | 0.1                     | 0.9    | 0.8                         | 1.2                         | -0.3                    | 0.6                     |
|                 | 2015 | 2.2    | 2.1                         | 2.4                         | -0.2                    | 0.2                     | 1.2    | 1.0                         | 2.1                         | -0.3                    | 0.6                     |
|                 | 2016 | 2.4    | 2.3                         | 2.6                         | -0.2                    | 0.2                     | 1.2    | 0.7                         | 1.9                         | -0.3                    | 0.6                     |
|                 | 2017 | 2.5    | 2.4                         | 2.6                         | -0.2                    | 0.2                     | 1.2    | 0.6                         | 2.5                         | -0.4                    | 0.6                     |
|                 | 2018 | 2.7    | 2.6                         | 2.8                         | -0.1                    | 0.1                     | 1.2    | 0.7                         | 1.6                         | -0.4                    | 0.7                     |
|                 | 2019 | 2.4    | 2.3                         | 2.6                         | -0.2                    | 0.2                     | 1.0    | 0.7                         | 1.6                         | -0.4                    | 0.6                     |
|                 | 2020 | 2.7    | 2.4                         | 3.0                         | -0.2                    | 0.2                     | 0.7    | 0.5                         | 1.7                         | -0.2                    | 0.4                     |
| C US (CENSARA)  | 2011 | 2.0    | 1.9                         | 2.1                         | -0.1                    | 0.1                     | 42.4   | 37.3                        | 45.1                        | -2.0                    | 5.7                     |
|                 | 2012 | 2.0    | 1.8                         | 2.1                         | -0.1                    | 0.1                     | 8.8    | 6.7                         | 9.0                         | -5.0                    | 9.2                     |
|                 | 2013 | 2.3    | 2.2                         | 2.5                         | -0.1                    | 0.2                     | 16.7   | 12.1                        | 23.8                        | -5.5                    | 7.6                     |
|                 | 2014 | 2.7    | 2.5                         | 2.8                         | -0.1                    | 0.2                     | 19.1   | 6.5                         | 41.8                        | -3.9                    | 6.1                     |
|                 | 2015 | 2.5    | 2.3                         | 2.8                         | -0.1                    | 0.2                     | 6.9    | 5.2                         | 18.9                        | -3.8                    | 5.9                     |
|                 | 2016 | 2.5    | 2.3                         | 2.8                         | -0.2                    | 0.2                     | 7.9    | 5.3                         | 18.1                        | -3.4                    | 5.9                     |
|                 | 2017 | 2.5    | 2.2                         | 2.9                         | -0.2                    | 0.2                     | 8.2    | 5.0                         | 18.1                        | -2.7                    | 5.3                     |
|                 | 2018 | 2.7    | 2.2                         | 3.2                         | -0.2                    | 0.2                     | 8.1    | 5.9                         | 15.4                        | -3.7                    | 5.8                     |
|                 | 2019 | 2.7    | 2.2                         | 3.1                         | -0.3                    | 0.3                     | 7.4    | 4.4                         | 21.5                        | -3.0                    | 5.2                     |
|                 | 2020 | 2.7    | 2.1                         | 3.2                         | -0.2                    | 0.2                     | 5.8    | 5.6                         | 10.9                        | -0.4                    | 5.0                     |
| MW US (LADCO)   | 2011 | 2.1    | 2.1                         | 2.3                         | -0.1                    | 0.1                     | 15.4   | 11.4                        | 26.7                        | -3.8                    | 8.2                     |
|                 | 2012 | 2.3    | 2.3                         | 2.5                         | -0.1                    | 0.1                     | 11.3   | 8.3                         | 18.4                        | -6.1                    | 10.1                    |
|                 | 2013 | 2.8    | 2.5                         | 2.8                         | -0.1                    | 0.1                     | 18.8   | 10.2                        | 40.4                        | -4.8                    | 7.6                     |
|                 | 2014 | 2.8    | 2.5                         | 3.0                         | -0.1                    | 0.1                     | 20.1   | 11.3                        | 28.9                        | -4.6                    | 7.9                     |
|                 | 2015 | 2.7    | 2.4                         | 2.9                         | -0.1                    | 0.1                     | 12.8   | 8.7                         | 22.3                        | -4.2                    | 7.0                     |
|                 | 2016 | 2.7    | 2.4                         | 2.9                         | -0.1                    | 0.2                     | 12.3   | 7.1                         | 22.1                        | -5.0                    | 7.7                     |
|                 | 2017 | 2.8    | 2.6                         | 3.0                         | -0.2                    | 0.1                     | 16.1   | 8.3                         | 28.3                        | -4.9                    | 7.7                     |
|                 | 2018 | 2.9    | 2.7                         | 3.1                         | -0.2                    | 0.2                     | 18.0   | 8.7                         | 27.3                        | -3.3                    | 6.0                     |
|                 | 2019 | 2.8    | 2.5                         | 3.0                         | -0.2                    | 0.2                     | 10.7   | 9.0                         | 15.1                        | -3.6                    | 6.3                     |
|                 | 2020 | 2.8    | 2.6                         | 2.9                         | -0.2                    | 0.1                     | 12.1   | 5.8                         | 20.6                        | -1.0                    | 5.2                     |
| NE US (MANE-VU) | 2011 | 1.7    | 1.5                         | 1.8                         | -0.1                    | 0.1                     | 75.9   | 29.3                        | 77.2                        | -4.6                    | 6.1                     |
|                 | 2012 | 2.0    | 1.8                         | 2.1                         | -0.1                    | 0.1                     | 8.2    | 7.0                         | 14.3                        | -2.6                    | 5.0                     |
|                 | 2013 | 2.1    | 2.1                         | 2.2                         | -0.1                    | 0.1                     | 8.4    | 6.2                         | 11.2                        | -2.2                    | 4.5                     |
|                 | 2014 | 2.1    | 2.0                         | 2.3                         | -0.1                    | 0.1                     | 7.0    | 5.1                         | 10.3                        | -2.9                    | 4.9                     |
|                 | 2015 | 2.1    | 1.8                         | 2.2                         | -0.1                    | 0.1                     | 5.8    | 4.4                         | 14.6                        | -2.8                    | 4.6                     |
|                 | 2016 | 2.1    | 1.9                         | 2.3                         | -0.1                    | 0.1                     | 7.2    | 3.6                         | 14.1                        | -3.7                    | 6.5                     |
|                 | 2017 | 2.4    | 2.2                         | 2.5                         | -0.2                    | 0.2                     | 12.4   | 7.6                         | 20.6                        | -4.3                    | 6.6                     |
|                 | 2018 | 2.4    | 2.2                         | 2.4                         | -0.2                    | 0.2                     | 15.6   | 6.5                         | 21.4                        | -3.1                    | 5.2                     |
|                 | 2019 | 2.2    | 2.1                         | 2.4                         | -0.3                    | 0.2                     | 8.1    | 4.5                         | 12.0                        | -3.1                    | 4.9                     |
|                 | 2020 | 2.2    | 2.0                         | 2.5                         | -0.5                    | 0.4                     | 5.8    | 3.2                         | 11.0                        | -4.3                    | 10.5                    |
| SE US (SESARM)  | 2011 | 1.7    | 1.5                         | 2.2                         | -0.1                    | 0.2                     | 31.7   | 20.3                        | 53.4                        | -5.4                    | 8.8                     |
|                 | 2012 | 1.9    | 1.8                         | 2.4                         | -0.2                    | 0.2                     | 15.6   | 9.7                         | 30.8                        | -6.0                    | 10.1                    |
|                 | 2013 | 2.3    | 1.9                         | 2.7                         | -0.1                    | 0.2                     | 13.4   | 8.6                         | 21.8                        | -5.6                    | 8.9                     |
|                 | 2014 | 2.3    | 1.9                         | 2.6                         | -0.2                    | 0.2                     | 16.1   | 11.5                        | 20.3                        | -4.9                    | 7.5                     |
|                 | 2015 | 2.1    | 1.9                         | 2.5                         | -0.2                    | 0.2                     | 16.0   | 9.3                         | 30.9                        | -3.9                    | 6.2                     |
|                 | 2016 | 2.1    | 1.9                         | 2.6                         | -0.2                    | 0.2                     | 11.6   | 6.4                         | 25.2                        | -4.2                    | 6.6                     |
|                 | 2017 | 2.2    | 2.0                         | 2.6                         | -0.2                    | 0.2                     | 16.3   | 6.8                         | 29.1                        | -4.8                    | 6.9                     |
|                 | 2018 | 2.2    | 2.0                         | 2.7                         | -0.3                    | 0.2                     | 14.3   | 8.2                         | 25.3                        | -4.1                    | 6.2                     |
|                 | 2019 | 2.1    | 2.0                         | 2.6                         | -0.3                    | 0.3                     | 10.3   | 6.9                         | 20.8                        | -4.5                    | 6.6                     |
|                 | 2020 | 2.2    | 2.0                         | 2.7                         | -0.3                    | 0.3                     | 12.2   | 7.9                         | 20.9                        | -4.6                    | 8.9                     |

**Supplementary Table 12. Simulated annual  $\Delta c_{\text{SIA}}/\Delta c_{\text{SO}_4^{2-}}$ ,  $\Delta c_{\text{SIA}}/\Delta c_{\text{NO}_3^-}$ , and  $\Delta c_{\text{SIA}}/\Delta c_{\text{NH}_4^+}$  with 10% reductions.** “W US”, “C US”, “MW US”, “NE US”, “SE US” stand for the Western, Central, Midwestern, Northeastern, Southeastern US, respectively. The 25<sup>th</sup> and 75<sup>th</sup> percentiles (perc) of values from the sites within the corresponding region show their regional variability. Uncertainty lower and upper bounds (Unc LB and Unc UB) are the mean uncertainties (95% CI defined as the 2.5<sup>th</sup> and the 97.5<sup>th</sup> percentiles) of the sites within the region. Uncertainties of each site are estimated using 500 Monte Carlo simulations based on the precisions and detection limits shown in Supplementary Table 7.

| Region          | Year | $\Delta c_{\text{SIA}}/\Delta c_{\text{SO}_4^{2-}}$ (10%) |                       |                       |        |        | $\Delta c_{\text{SIA}}/\Delta c_{\text{NO}_3^-}$ (10%) |                       |                       |        |        | $\Delta c_{\text{SIA}}/\Delta c_{\text{NH}_4^+}$ (10%) |                       |                       |        |        |
|-----------------|------|-----------------------------------------------------------|-----------------------|-----------------------|--------|--------|--------------------------------------------------------|-----------------------|-----------------------|--------|--------|--------------------------------------------------------|-----------------------|-----------------------|--------|--------|
|                 |      | Median                                                    | 25 <sup>th</sup> perc | 75 <sup>th</sup> perc | Unc LB | Unc UB | Median                                                 | 25 <sup>th</sup> perc | 75 <sup>th</sup> perc | Unc LB | Unc UB | Median                                                 | 25 <sup>th</sup> perc | 75 <sup>th</sup> perc | Unc LB | Unc UB |
| W US (WRAP)     | 2011 | 1.33                                                      | 1.09                  | 1.37                  | -0.04  | 0.31   | 0.23                                                   | 0.19                  | 0.31                  | -0.01  | 0.03   | 0.16                                                   | 0.12                  | 0.19                  | 0.00   | 0.01   |
|                 | 2012 | 1.39                                                      | 1.38                  | 1.42                  | -0.09  | 0.28   | 0.27                                                   | 0.17                  | 0.40                  | -0.01  | 0.02   | 0.13                                                   | 0.10                  | 0.16                  | 0.00   | 0.01   |
|                 | 2013 | 1.37                                                      | 1.37                  | 1.39                  | -0.14  | 0.34   | 0.45                                                   | 0.25                  | 0.54                  | -0.01  | 0.07   | 0.13                                                   | 0.09                  | 0.14                  | 0.00   | 0.01   |
|                 | 2014 | 1.37                                                      | 1.11                  | 1.39                  | -0.14  | 0.37   | 0.33                                                   | 0.18                  | 0.51                  | -0.01  | 0.07   | 0.12                                                   | 0.07                  | 0.14                  | 0.00   | 0.01   |
|                 | 2015 | 1.37                                                      | 1.34                  | 1.38                  | -0.16  | 0.35   | 0.41                                                   | 0.25                  | 0.44                  | -0.01  | 0.03   | 0.12                                                   | 0.09                  | 0.15                  | 0.00   | 0.01   |
|                 | 2016 | 1.35                                                      | 1.27                  | 1.37                  | -0.31  | 0.64   | 0.41                                                   | 0.25                  | 0.42                  | -0.02  | 0.05   | 0.10                                                   | 0.08                  | 0.14                  | 0.00   | 0.01   |
|                 | 2017 | 1.39                                                      | 1.31                  | 1.40                  | -0.36  | 0.72   | 0.41                                                   | 0.23                  | 0.45                  | -0.03  | 0.05   | 0.09                                                   | 0.07                  | 0.12                  | 0.00   | 0.01   |
|                 | 2018 | 1.34                                                      | 0.87                  | 1.39                  | -0.54  | 1.08   | 0.39                                                   | 0.34                  | 0.45                  | -0.05  | 0.07   | 0.10                                                   | 0.07                  | 0.14                  | 0.00   | 0.01   |
|                 | 2019 | 1.37                                                      | 1.35                  | 1.38                  | -0.09  | 0.38   | 0.45                                                   | 0.29                  | 0.51                  | -0.02  | 0.03   | 0.13                                                   | 0.08                  | 0.17                  | 0.00   | 0.03   |
|                 | 2020 | 1.33                                                      | 1.08                  | 1.35                  | -0.49  | 0.85   | 0.46                                                   | 0.41                  | 0.51                  | -0.05  | 0.07   | 0.10                                                   | 0.07                  | 0.12                  | 0.00   | 0.01   |
| C US (CENSARA)  | 2011 | 1.29                                                      | 1.27                  | 1.30                  | 0.00   | 0.00   | 0.54                                                   | 0.45                  | 0.63                  | 0.00   | 0.01   | 0.37                                                   | 0.33                  | 0.42                  | -0.01  | 0.02   |
|                 | 2012 | 1.36                                                      | 1.32                  | 1.37                  | 0.00   | 0.08   | 0.59                                                   | 0.46                  | 0.60                  | 0.00   | 0.01   | 0.21                                                   | 0.19                  | 0.30                  | 0.00   | 0.01   |
|                 | 2013 | 1.35                                                      | 1.33                  | 1.36                  | 0.00   | 0.01   | 0.72                                                   | 0.61                  | 0.79                  | 0.00   | 0.01   | 0.22                                                   | 0.18                  | 0.26                  | 0.00   | 0.01   |
|                 | 2014 | 1.37                                                      | 1.35                  | 1.39                  | -0.01  | 0.12   | 0.79                                                   | 0.75                  | 0.81                  | 0.00   | 0.01   | 0.17                                                   | 0.13                  | 0.21                  | 0.00   | 0.01   |
|                 | 2015 | 1.37                                                      | 1.32                  | 1.40                  | -0.02  | 0.26   | 0.68                                                   | 0.64                  | 0.77                  | -0.01  | 0.02   | 0.16                                                   | 0.14                  | 0.24                  | 0.00   | 0.02   |
|                 | 2016 | 1.39                                                      | 1.32                  | 1.40                  | -0.02  | 0.15   | 0.65                                                   | 0.59                  | 0.77                  | -0.01  | 0.01   | 0.15                                                   | 0.10                  | 0.24                  | 0.00   | 0.01   |
|                 | 2017 | 1.39                                                      | 1.32                  | 1.41                  | -0.01  | 0.12   | 0.64                                                   | 0.52                  | 0.83                  | -0.01  | 0.01   | 0.14                                                   | 0.10                  | 0.23                  | 0.00   | 0.01   |
|                 | 2018 | 1.38                                                      | 1.32                  | 1.40                  | -0.03  | 0.13   | 0.71                                                   | 0.54                  | 0.86                  | 0.00   | 0.01   | 0.11                                                   | 0.09                  | 0.26                  | 0.00   | 0.02   |
|                 | 2019 | 1.37                                                      | 1.31                  | 1.41                  | -0.04  | 0.24   | 0.77                                                   | 0.62                  | 0.83                  | -0.01  | 0.02   | 0.14                                                   | 0.09                  | 0.30                  | 0.00   | 0.03   |
|                 | 2020 | 1.39                                                      | 1.28                  | 1.42                  | -0.10  | 0.20   | 0.70                                                   | 0.48                  | 0.84                  | -0.01  | 0.02   | 0.15                                                   | 0.09                  | 0.27                  | 0.00   | 0.03   |
| MW US (LADCO)   | 2011 | 1.22                                                      | 1.12                  | 1.32                  | -0.01  | 0.03   | 0.58                                                   | 0.50                  | 0.70                  | -0.01  | 0.01   | 0.60                                                   | 0.33                  | 0.92                  | -0.01  | 0.02   |
|                 | 2012 | 1.36                                                      | 1.32                  | 1.37                  | 0.00   | 0.03   | 0.81                                                   | 0.75                  | 0.83                  | 0.00   | 0.01   | 0.25                                                   | 0.19                  | 0.42                  | 0.00   | 0.02   |
|                 | 2013 | 1.35                                                      | 1.31                  | 1.36                  | 0.00   | 0.01   | 0.95                                                   | 0.86                  | 0.98                  | 0.00   | 0.01   | 0.22                                                   | 0.17                  | 0.47                  | 0.00   | 0.02   |
|                 | 2014 | 1.36                                                      | 1.27                  | 1.37                  | 0.00   | 0.02   | 0.98                                                   | 0.82                  | 1.02                  | 0.00   | 0.03   | 0.21                                                   | 0.12                  | 0.56                  | -0.01  | 0.03   |
|                 | 2015 | 1.30                                                      | 1.22                  | 1.37                  | -0.02  | 0.08   | 0.85                                                   | 0.69                  | 0.95                  | -0.01  | 0.02   | 0.30                                                   | 0.20                  | 0.78                  | 0.00   | 0.05   |
|                 | 2016 | 1.34                                                      | 1.29                  | 1.38                  | -0.01  | 0.06   | 0.85                                                   | 0.72                  | 0.94                  | -0.01  | 0.01   | 0.21                                                   | 0.16                  | 0.49                  | -0.01  | 0.03   |
|                 | 2017 | 1.37                                                      | 1.33                  | 1.38                  | -0.01  | 0.14   | 0.87                                                   | 0.82                  | 0.95                  | 0.00   | 0.01   | 0.19                                                   | 0.13                  | 0.34                  | 0.00   | 0.02   |
|                 | 2018 | 1.35                                                      | 1.32                  | 1.38                  | -0.01  | 0.04   | 0.93                                                   | 0.88                  | 1.00                  | 0.00   | 0.01   | 0.18                                                   | 0.11                  | 0.39                  | 0.00   | 0.04   |
|                 | 2019 | 1.36                                                      | 1.31                  | 1.38                  | -0.02  | 0.09   | 0.93                                                   | 0.84                  | 1.00                  | -0.01  | 0.02   | 0.21                                                   | 0.12                  | 0.46                  | -0.01  | 0.06   |
|                 | 2020 | 1.34                                                      | 1.31                  | 1.38                  | -0.08  | 0.21   | 0.86                                                   | 0.79                  | 0.92                  | -0.01  | 0.03   | 0.19                                                   | 0.16                  | 0.45                  | -0.01  | 0.05   |
| NE US (MANE-VU) | 2011 | 1.07                                                      | 0.96                  | 1.14                  | -0.01  | 0.02   | 0.39                                                   | 0.31                  | 0.51                  | -0.01  | 0.02   | 1.14                                                   | 0.95                  | 1.45                  | -0.03  | 0.06   |
|                 | 2012 | 1.14                                                      | 1.10                  | 1.22                  | -0.01  | 0.01   | 0.60                                                   | 0.46                  | 0.64                  | -0.01  | 0.02   | 0.95                                                   | 0.58                  | 1.08                  | -0.02  | 0.04   |
|                 | 2013 | 1.23                                                      | 1.14                  | 1.25                  | -0.01  | 0.02   | 0.64                                                   | 0.54                  | 0.75                  | -0.02  | 0.03   | 0.64                                                   | 0.49                  | 0.99                  | -0.03  | 0.05   |
|                 | 2014 | 1.16                                                      | 1.14                  | 1.22                  | -0.02  | 0.03   | 0.67                                                   | 0.57                  | 0.72                  | -0.02  | 0.03   | 0.71                                                   | 0.60                  | 0.90                  | -0.05  | 0.06   |
|                 | 2015 | 1.08                                                      | 1.01                  | 1.17                  | -0.02  | 0.04   | 0.49                                                   | 0.46                  | 0.61                  | -0.02  | 0.03   | 0.86                                                   | 0.62                  | 1.08                  | -0.03  | 0.05   |
|                 | 2016 | 1.23                                                      | 1.18                  | 1.26                  | -0.02  | 0.03   | 0.62                                                   | 0.48                  | 0.66                  | -0.02  | 0.02   | 0.53                                                   | 0.35                  | 0.74                  | -0.02  | 0.04   |
|                 | 2017 | 1.25                                                      | 1.24                  | 1.29                  | -0.01  | 0.03   | 0.69                                                   | 0.60                  | 0.80                  | -0.01  | 0.02   | 0.45                                                   | 0.30                  | 0.67                  | -0.02  | 0.04   |
|                 | 2018 | 1.22                                                      | 1.17                  | 1.29                  | -0.03  | 0.05   | 0.75                                                   | 0.59                  | 0.83                  | -0.02  | 0.04   | 0.56                                                   | 0.34                  | 0.83                  | -0.02  | 0.07   |
|                 | 2019 | 1.20                                                      | 1.14                  | 1.27                  | -0.04  | 0.06   | 0.67                                                   | 0.58                  | 0.81                  | -0.03  | 0.05   | 0.53                                                   | 0.33                  | 0.96                  | -0.03  | 0.08   |
|                 | 2020 | 1.22                                                      | 1.17                  | 1.28                  | -0.03  | 0.06   | 0.62                                                   | 0.55                  | 0.69                  | -0.02  | 0.04   | 0.53                                                   | 0.30                  | 0.74                  | -0.03  | 0.07   |
| SE US (SESARM)  | 2011 | 1.22                                                      | 0.94                  | 1.28                  | 0.00   | 0.13   | 0.46                                                   | 0.35                  | 0.66                  | -0.01  | 0.03   | 0.33                                                   | 0.16                  | 0.53                  | -0.01  | 0.10   |
|                 | 2012 | 1.25                                                      | 1.09                  | 1.30                  | -0.01  | 0.02   | 0.55                                                   | 0.43                  | 0.69                  | -0.01  | 0.01   | 0.34                                                   | 0.21                  | 0.49                  | -0.01  | 0.02   |
|                 | 2013 | 1.24                                                      | 1.18                  | 1.30                  | 0.00   | 0.02   | 0.68                                                   | 0.54                  | 0.77                  | -0.01  | 0.01   | 0.36                                                   | 0.17                  | 0.51                  | -0.01  | 0.02   |
|                 | 2014 | 1.23                                                      | 1.14                  | 1.30                  | -0.01  | 0.02   | 0.64                                                   | 0.55                  | 0.70                  | -0.01  | 0.02   | 0.29                                                   | 0.20                  | 0.53                  | -0.01  | 0.02   |
|                 | 2015 | 1.22                                                      | 1.16                  | 1.28                  | -0.02  | 0.07   | 0.56                                                   | 0.45                  | 0.66                  | -0.01  | 0.02   | 0.36                                                   | 0.21                  | 0.54                  | -0.01  | 0.03   |
|                 | 2016 | 1.29                                                      | 1.23                  | 1.33                  | -0.01  | 0.11   | 0.52                                                   | 0.44                  | 0.68                  | -0.01  | 0.02   | 0.30                                                   | 0.18                  | 0.37                  | -0.01  | 0.02   |
|                 | 2017 | 1.30                                                      | 1.24                  | 1.32                  | -0.01  | 0.07   | 0.56                                                   | 0.45                  | 0.67                  | -0.01  | 0.02   | 0.25                                                   | 0.17                  | 0.35                  | 0.00   | 0.02   |
|                 | 2018 | 1.27                                                      | 1.22                  | 1.32                  | -0.01  | 0.07   | 0.60                                                   | 0.49                  | 0.71                  | -0.01  | 0.03   | 0.31                                                   | 0.19                  | 0.46                  | -0.01  | 0.03   |
|                 | 2019 | 1.30                                                      | 1.21                  | 1.33                  | -0.01  | 0.15   | 0.50                                                   | 0.42                  | 0.68                  | -0.02  | 0.03   | 0.29                                                   | 0.18                  | 0.37                  | -0.01  | 0.04   |
|                 | 2020 | 1.27                                                      | 1.21                  | 1.30                  | -0.03  | 0.12   | 0.50                                                   | 0.41                  | 0.69                  | -0.02  | 0.04   | 0.32                                                   | 0.22                  | 0.40                  | -0.02  | 0.04   |

**Supplementary Table 13. Simulated annual  $\Delta c_{\text{SIA}}/\Delta c_{\text{SO}_4^-}$ ,  $\Delta c_{\text{SIA}}/\Delta c_{\text{NO}_3^-}$ , and  $\Delta c_{\text{SIA}}/\Delta c_{\text{NH}_4^+}$  with 40% reductions.** “W US”, “C US”, “MW US”, “NE US”, “SE US” stand for the Western, Central, Midwestern, Northeastern, Southeastern US, respectively. The 25<sup>th</sup> and 75<sup>th</sup> percentiles (perc) of values from the sites within the corresponding region show their regional variability. Uncertainty lower and upper bounds (Unc LB and Unc UB) are the mean uncertainties (95% CI defined as the 2.5<sup>th</sup> and the 97.5<sup>th</sup> percentiles) of the sites within the region. Uncertainties of each site are estimated using 500 Monte Carlo simulations based on the precisions and detection limits shown in Supplementary Table 7.

| Region          | Year | $\Delta c_{\text{SIA}}/\Delta c_{\text{SO}_4^-}$ (40%) |                       |                       |        |        | $\Delta c_{\text{SIA}}/\Delta c_{\text{NO}_3^-}$ (40%) |                       |                       |        |        | $\Delta c_{\text{SIA}}/\Delta c_{\text{NH}_4^+}$ (40%) |                       |                       |        |        |
|-----------------|------|--------------------------------------------------------|-----------------------|-----------------------|--------|--------|--------------------------------------------------------|-----------------------|-----------------------|--------|--------|--------------------------------------------------------|-----------------------|-----------------------|--------|--------|
|                 |      | Median                                                 | 25 <sup>th</sup> perc | 75 <sup>th</sup> perc | Unc LB | Unc UB | Median                                                 | 25 <sup>th</sup> perc | 75 <sup>th</sup> perc | Unc LB | Unc UB | Median                                                 | 25 <sup>th</sup> perc | 75 <sup>th</sup> perc | Unc LB | Unc UB |
| W US (WRAP)     | 2011 | 1.27                                                   | 1.15                  | 1.35                  | -0.04  | 0.15   | 0.23                                                   | 0.19                  | 0.31                  | 0.00   | 0.02   | 0.20                                                   | 0.16                  | 0.23                  | 0.00   | 0.01   |
|                 | 2012 | 1.30                                                   | 1.25                  | 1.36                  | -0.09  | 0.17   | 0.26                                                   | 0.17                  | 0.40                  | 0.00   | 0.01   | 0.17                                                   | 0.12                  | 0.20                  | 0.00   | 0.01   |
|                 | 2013 | 1.37                                                   | 1.28                  | 1.38                  | -0.09  | 0.20   | 0.45                                                   | 0.24                  | 0.54                  | 0.00   | 0.04   | 0.16                                                   | 0.12                  | 0.18                  | 0.00   | 0.01   |
|                 | 2014 | 1.22                                                   | 0.88                  | 1.39                  | -0.14  | 0.20   | 0.33                                                   | 0.17                  | 0.50                  | -0.01  | 0.05   | 0.15                                                   | 0.11                  | 0.17                  | 0.00   | 0.01   |
|                 | 2015 | 1.35                                                   | 1.26                  | 1.38                  | -0.09  | 0.19   | 0.41                                                   | 0.25                  | 0.43                  | -0.01  | 0.03   | 0.16                                                   | 0.14                  | 0.18                  | 0.00   | 0.01   |
|                 | 2016 | 1.25                                                   | 1.14                  | 1.35                  | -0.15  | 0.28   | 0.40                                                   | 0.26                  | 0.42                  | -0.02  | 0.04   | 0.14                                                   | 0.10                  | 0.19                  | 0.00   | 0.01   |
|                 | 2017 | 1.21                                                   | 0.89                  | 1.30                  | -0.15  | 0.25   | 0.41                                                   | 0.25                  | 0.45                  | -0.03  | 0.05   | 0.14                                                   | 0.10                  | 0.15                  | 0.00   | 0.01   |
|                 | 2018 | 0.93                                                   | 0.60                  | 1.17                  | -0.22  | 0.32   | 0.39                                                   | 0.34                  | 0.44                  | -0.05  | 0.07   | 0.13                                                   | 0.09                  | 0.17                  | 0.00   | 0.01   |
|                 | 2019 | 1.34                                                   | 0.99                  | 1.37                  | -0.10  | 0.19   | 0.44                                                   | 0.28                  | 0.51                  | -0.02  | 0.03   | 0.19                                                   | 0.09                  | 0.25                  | 0.00   | 0.03   |
|                 | 2020 | 0.65                                                   | 0.39                  | 0.80                  | -0.17  | 0.27   | 0.44                                                   | 0.41                  | 0.51                  | -0.06  | 0.08   | 0.13                                                   | 0.08                  | 0.17                  | 0.00   | 0.02   |
| C US (CENSARA)  | 2011 | 1.30                                                   | 1.29                  | 1.32                  | 0.00   | 0.00   | 0.55                                                   | 0.47                  | 0.64                  | 0.00   | 0.01   | 0.68                                                   | 0.66                  | 0.71                  | -0.02  | 0.04   |
|                 | 2012 | 1.37                                                   | 1.34                  | 1.39                  | -0.02  | 0.06   | 0.59                                                   | 0.46                  | 0.59                  | 0.00   | 0.01   | 0.34                                                   | 0.29                  | 0.41                  | -0.01  | 0.01   |
|                 | 2013 | 1.36                                                   | 1.34                  | 1.37                  | -0.01  | 0.03   | 0.72                                                   | 0.62                  | 0.79                  | 0.00   | 0.00   | 0.40                                                   | 0.31                  | 0.46                  | -0.01  | 0.02   |
|                 | 2014 | 1.34                                                   | 1.30                  | 1.37                  | -0.02  | 0.04   | 0.78                                                   | 0.75                  | 0.81                  | 0.00   | 0.01   | 0.27                                                   | 0.21                  | 0.38                  | -0.01  | 0.01   |
|                 | 2015 | 1.37                                                   | 1.33                  | 1.41                  | -0.03  | 0.08   | 0.68                                                   | 0.64                  | 0.76                  | -0.01  | 0.02   | 0.24                                                   | 0.19                  | 0.47                  | 0.00   | 0.02   |
|                 | 2016 | 1.34                                                   | 1.31                  | 1.41                  | -0.02  | 0.11   | 0.64                                                   | 0.60                  | 0.76                  | -0.01  | 0.01   | 0.23                                                   | 0.16                  | 0.39                  | -0.01  | 0.01   |
|                 | 2017 | 1.39                                                   | 1.32                  | 1.41                  | -0.02  | 0.10   | 0.63                                                   | 0.52                  | 0.82                  | 0.00   | 0.01   | 0.20                                                   | 0.14                  | 0.31                  | 0.00   | 0.02   |
|                 | 2018 | 1.34                                                   | 1.30                  | 1.35                  | -0.04  | 0.13   | 0.71                                                   | 0.55                  | 0.85                  | 0.00   | 0.01   | 0.16                                                   | 0.13                  | 0.42                  | 0.00   | 0.02   |
|                 | 2019 | 1.37                                                   | 1.31                  | 1.37                  | -0.03  | 0.13   | 0.76                                                   | 0.63                  | 0.82                  | -0.01  | 0.02   | 0.24                                                   | 0.12                  | 0.53                  | -0.01  | 0.03   |
|                 | 2020 | 1.19                                                   | 1.16                  | 1.25                  | -0.08  | 0.12   | 0.69                                                   | 0.49                  | 0.82                  | -0.02  | 0.02   | 0.21                                                   | 0.12                  | 0.39                  | 0.00   | 0.03   |
| MW US (LADCO)   | 2011 | 1.27                                                   | 1.20                  | 1.34                  | -0.02  | 0.04   | 0.69                                                   | 0.63                  | 0.73                  | -0.01  | 0.01   | 0.86                                                   | 0.47                  | 1.23                  | -0.01  | 0.02   |
|                 | 2012 | 1.37                                                   | 1.35                  | 1.38                  | 0.00   | 0.04   | 0.81                                                   | 0.76                  | 0.84                  | 0.00   | 0.00   | 0.50                                                   | 0.42                  | 0.77                  | -0.01  | 0.02   |
|                 | 2013 | 1.36                                                   | 1.34                  | 1.37                  | 0.00   | 0.01   | 0.96                                                   | 0.88                  | 0.98                  | 0.00   | 0.00   | 0.58                                                   | 0.58                  | 0.99                  | -0.02  | 0.03   |
|                 | 2014 | 1.37                                                   | 1.31                  | 1.37                  | -0.01  | 0.02   | 0.99                                                   | 0.90                  | 1.02                  | 0.00   | 0.01   | 0.54                                                   | 0.46                  | 0.98                  | -0.02  | 0.02   |
|                 | 2015 | 1.35                                                   | 1.29                  | 1.38                  | -0.02  | 0.04   | 0.86                                                   | 0.78                  | 0.96                  | -0.01  | 0.01   | 0.58                                                   | 0.46                  | 1.14                  | -0.02  | 0.03   |
|                 | 2016 | 1.36                                                   | 1.33                  | 1.39                  | -0.01  | 0.06   | 0.85                                                   | 0.78                  | 0.95                  | 0.00   | 0.01   | 0.56                                                   | 0.37                  | 0.83                  | -0.01  | 0.02   |
|                 | 2017 | 1.38                                                   | 1.33                  | 1.39                  | -0.03  | 0.06   | 0.88                                                   | 0.82                  | 0.95                  | 0.00   | 0.01   | 0.40                                                   | 0.25                  | 0.69                  | -0.01  | 0.02   |
|                 | 2018 | 1.36                                                   | 1.30                  | 1.38                  | -0.02  | 0.07   | 0.94                                                   | 0.89                  | 1.00                  | 0.00   | 0.01   | 0.52                                                   | 0.23                  | 0.86                  | -0.01  | 0.04   |
|                 | 2019 | 1.36                                                   | 1.32                  | 1.38                  | -0.02  | 0.07   | 0.93                                                   | 0.87                  | 1.00                  | -0.01  | 0.01   | 0.52                                                   | 0.34                  | 1.01                  | -0.02  | 0.05   |
|                 | 2020 | 1.31                                                   | 1.29                  | 1.37                  | -0.05  | 0.11   | 0.87                                                   | 0.81                  | 0.92                  | -0.01  | 0.02   | 0.42                                                   | 0.32                  | 0.83                  | -0.02  | 0.04   |
| NE US (MANE-VU) | 2011 | 1.15                                                   | 1.06                  | 1.20                  | -0.01  | 0.01   | 0.46                                                   | 0.38                  | 0.58                  | -0.01  | 0.02   | 1.43                                                   | 1.26                  | 1.63                  | -0.03  | 0.05   |
|                 | 2012 | 1.22                                                   | 1.17                  | 1.26                  | -0.01  | 0.01   | 0.65                                                   | 0.54                  | 0.67                  | -0.01  | 0.02   | 1.29                                                   | 0.95                  | 1.39                  | -0.02  | 0.03   |
|                 | 2013 | 1.27                                                   | 1.19                  | 1.29                  | -0.01  | 0.02   | 0.68                                                   | 0.60                  | 0.78                  | -0.01  | 0.02   | 0.98                                                   | 0.85                  | 1.35                  | -0.02  | 0.04   |
|                 | 2014 | 1.24                                                   | 1.18                  | 1.28                  | -0.02  | 0.02   | 0.74                                                   | 0.64                  | 0.80                  | -0.02  | 0.02   | 1.11                                                   | 0.86                  | 1.34                  | -0.03  | 0.04   |
|                 | 2015 | 1.18                                                   | 1.11                  | 1.22                  | -0.02  | 0.03   | 0.61                                                   | 0.53                  | 0.70                  | -0.02  | 0.04   | 1.13                                                   | 0.84                  | 1.31                  | -0.03  | 0.04   |
|                 | 2016 | 1.26                                                   | 1.23                  | 1.29                  | -0.01  | 0.03   | 0.65                                                   | 0.51                  | 0.70                  | -0.01  | 0.02   | 0.79                                                   | 0.57                  | 0.93                  | -0.02  | 0.03   |
|                 | 2017 | 1.28                                                   | 1.26                  | 1.30                  | -0.01  | 0.02   | 0.73                                                   | 0.62                  | 0.81                  | -0.01  | 0.02   | 0.71                                                   | 0.58                  | 0.99                  | -0.02  | 0.03   |
|                 | 2018 | 1.26                                                   | 1.23                  | 1.29                  | -0.02  | 0.03   | 0.79                                                   | 0.66                  | 0.87                  | -0.01  | 0.03   | 0.88                                                   | 0.58                  | 1.12                  | -0.03  | 0.05   |
|                 | 2019 | 1.23                                                   | 1.18                  | 1.28                  | -0.03  | 0.05   | 0.69                                                   | 0.64                  | 0.83                  | -0.02  | 0.04   | 0.85                                                   | 0.56                  | 1.24                  | -0.04  | 0.07   |
|                 | 2020 | 1.23                                                   | 1.22                  | 1.27                  | -0.03  | 0.06   | 0.65                                                   | 0.59                  | 0.71                  | -0.02  | 0.04   | 0.76                                                   | 0.45                  | 1.03                  | -0.03  | 0.05   |
| SE US (SESARM)  | 2011 | 1.27                                                   | 0.94                  | 1.30                  | 0.00   | 0.04   | 0.49                                                   | 0.37                  | 0.66                  | -0.01  | 0.02   | 0.52                                                   | 0.19                  | 0.79                  | -0.03  | 0.08   |
|                 | 2012 | 1.28                                                   | 1.13                  | 1.33                  | 0.00   | 0.02   | 0.57                                                   | 0.46                  | 0.70                  | -0.01  | 0.01   | 0.49                                                   | 0.26                  | 0.68                  | -0.01  | 0.05   |
|                 | 2013 | 1.28                                                   | 1.20                  | 1.32                  | 0.00   | 0.03   | 0.69                                                   | 0.56                  | 0.81                  | -0.01  | 0.01   | 0.54                                                   | 0.20                  | 0.77                  | -0.02  | 0.03   |
|                 | 2014 | 1.29                                                   | 1.18                  | 1.32                  | -0.01  | 0.02   | 0.66                                                   | 0.56                  | 0.75                  | -0.01  | 0.01   | 0.46                                                   | 0.26                  | 0.83                  | -0.01  | 0.02   |
|                 | 2015 | 1.25                                                   | 1.20                  | 1.31                  | -0.02  | 0.04   | 0.58                                                   | 0.48                  | 0.73                  | -0.01  | 0.02   | 0.56                                                   | 0.26                  | 0.68                  | -0.01  | 0.04   |
|                 | 2016 | 1.31                                                   | 1.27                  | 1.34                  | -0.01  | 0.06   | 0.55                                                   | 0.44                  | 0.70                  | -0.01  | 0.02   | 0.41                                                   | 0.28                  | 0.52                  | -0.01  | 0.02   |
|                 | 2017 | 1.31                                                   | 1.25                  | 1.32                  | -0.01  | 0.06   | 0.57                                                   | 0.46                  | 0.69                  | -0.01  | 0.01   | 0.38                                                   | 0.22                  | 0.51                  | -0.01  | 0.02   |
|                 | 2018 | 1.29                                                   | 1.24                  | 1.32                  | -0.01  | 0.06   | 0.62                                                   | 0.50                  | 0.76                  | -0.01  | 0.02   | 0.47                                                   | 0.25                  | 0.66                  | -0.02  | 0.03   |
|                 | 2019 | 1.31                                                   | 1.26                  | 1.34                  | -0.02  | 0.08   | 0.51                                                   | 0.44                  | 0.73                  | -0.01  | 0.03   | 0.42                                                   | 0.23                  | 0.52                  | -0.02  | 0.04   |
|                 | 2020 | 1.28                                                   | 1.22                  | 1.31                  | -0.04  | 0.09   | 0.52                                                   | 0.44                  | 0.69                  | -0.01  | 0.03   | 0.43                                                   | 0.22                  | 0.53                  | -0.02  | 0.04   |

**Supplementary Table 14. Simulated annual  $\Delta c_{\text{SIA}}/\Delta c_{\text{SO}_4^{2-}}$ ,  $\Delta c_{\text{SIA}}/\Delta c_{\text{NO}_3^-}$ , and  $\Delta c_{\text{SIA}}/\Delta c_{\text{NH}_4^+}$  with 70% reductions.** “W US”, “C US”, “MW US”, “NE US”, “SE US” stand for the Western, Central, Midwestern, Northeastern, Southeastern US, respectively. The 25<sup>th</sup> and 75<sup>th</sup> percentiles (perc) of values from the sites within the corresponding region show their regional variability. Uncertainty lower and upper bounds (Unc LB and Unc UB) are the mean uncertainties (95% CI defined as the 2.5<sup>th</sup> and the 97.5<sup>th</sup> percentiles) of the sites within the region. Uncertainties of each site are estimated using 500 Monte Carlo simulations based on the precisions and detection limits shown in Supplementary Table 7.

| Region          | Year | $\Delta c_{\text{SIA}}/\Delta c_{\text{SO}_4^{2-}}$ (70%) |                       |                       |        |        | $\Delta c_{\text{SIA}}/\Delta c_{\text{NO}_3^-}$ (70%) |                       |                       |        |        | $\Delta c_{\text{SIA}}/\Delta c_{\text{NH}_4^+}$ (70%) |                       |                       |        |        |
|-----------------|------|-----------------------------------------------------------|-----------------------|-----------------------|--------|--------|--------------------------------------------------------|-----------------------|-----------------------|--------|--------|--------------------------------------------------------|-----------------------|-----------------------|--------|--------|
|                 |      | Median                                                    | 25 <sup>th</sup> perc | 75 <sup>th</sup> perc | Unc LB | Unc UB | Median                                                 | 25 <sup>th</sup> perc | 75 <sup>th</sup> perc | Unc LB | Unc UB | Median                                                 | 25 <sup>th</sup> perc | 75 <sup>th</sup> perc | Unc LB | Unc UB |
| W US (WRAP)     | 2011 | 1.00                                                      | 0.75                  | 1.24                  | -0.11  | 0.17   | 0.14                                                   | 0.19                  | 0.31                  | -0.01  | 0.02   | 0.27                                                   | 0.22                  | 0.29                  | -0.01  | 0.01   |
|                 | 2012 | 0.75                                                      | 0.60                  | 1.24                  | -0.10  | 0.21   | 0.12                                                   | 0.17                  | 0.39                  | 0.00   | 0.02   | 0.22                                                   | 0.14                  | 0.27                  | 0.00   | 0.01   |
|                 | 2013 | 1.09                                                      | 0.93                  | 1.06                  | -0.07  | 0.13   | 0.14                                                   | 0.24                  | 0.53                  | 0.00   | 0.04   | 0.21                                                   | 0.18                  | 0.27                  | -0.01  | 0.02   |
|                 | 2014 | 0.81                                                      | 0.26                  | 1.05                  | -0.06  | 0.12   | 0.11                                                   | 0.17                  | 0.49                  | -0.01  | 0.04   | 0.19                                                   | 0.16                  | 0.22                  | 0.00   | 0.01   |
|                 | 2015 | 0.94                                                      | 0.64                  | 1.17                  | -0.05  | 0.14   | 0.08                                                   | 0.24                  | 0.43                  | -0.01  | 0.03   | 0.22                                                   | 0.18                  | 0.28                  | 0.00   | 0.01   |
|                 | 2016 | 0.44                                                      | 0.10                  | 0.82                  | -0.09  | 0.11   | 0.07                                                   | 0.26                  | 0.43                  | -0.02  | 0.04   | 0.20                                                   | 0.12                  | 0.27                  | 0.00   | 0.01   |
|                 | 2017 | 0.35                                                      | 0.17                  | 0.60                  | -0.07  | 0.13   | 0.09                                                   | 0.23                  | 0.44                  | -0.03  | 0.05   | 0.16                                                   | 0.15                  | 0.26                  | 0.00   | 0.01   |
|                 | 2018 | -0.15                                                     | -0.48                 | -0.15                 | -0.09  | 0.15   | 0.12                                                   | 0.35                  | 0.43                  | -0.04  | 0.07   | 0.17                                                   | 0.14                  | 0.23                  | 0.00   | 0.01   |
|                 | 2019 | 0.56                                                      | 0.14                  | 1.18                  | -0.07  | 0.11   | 0.09                                                   | 0.28                  | 0.50                  | -0.02  | 0.03   | 0.26                                                   | 0.12                  | 0.38                  | -0.01  | 0.03   |
|                 | 2020 | 0.06                                                      | -0.12                 | 0.27                  | -0.08  | 0.14   | 0.08                                                   | 0.40                  | 0.52                  | -0.05  | 0.06   | 0.19                                                   | 0.10                  | 0.24                  | -0.01  | 0.01   |
| C US (CENSARA)  | 2011 | 1.29                                                      | 1.27                  | 1.33                  | -0.02  | 0.02   | 0.13                                                   | 0.47                  | 0.64                  | 0.00   | 0.01   | 1.00                                                   | 0.98                  | 1.02                  | -0.02  | 0.03   |
|                 | 2012 | 1.29                                                      | 1.19                  | 1.34                  | -0.02  | 0.06   | 0.11                                                   | 0.46                  | 0.58                  | 0.00   | 0.01   | 0.59                                                   | 0.52                  | 0.64                  | -0.01  | 0.02   |
|                 | 2013 | 1.34                                                      | 1.32                  | 1.31                  | -0.02  | 0.04   | 0.22                                                   | 0.62                  | 0.79                  | 0.00   | 0.00   | 0.79                                                   | 0.72                  | 0.79                  | -0.02  | 0.02   |
|                 | 2014 | 1.29                                                      | 1.28                  | 1.32                  | -0.03  | 0.07   | 0.31                                                   | 0.74                  | 0.80                  | 0.00   | 0.01   | 0.59                                                   | 0.44                  | 0.71                  | -0.02  | 0.02   |
|                 | 2015 | 1.26                                                      | 1.21                  | 1.33                  | -0.04  | 0.08   | 0.27                                                   | 0.64                  | 0.75                  | -0.01  | 0.02   | 0.48                                                   | 0.40                  | 0.76                  | -0.01  | 0.02   |
|                 | 2016 | 1.12                                                      | 0.90                  | 1.20                  | -0.04  | 0.06   | 0.24                                                   | 0.60                  | 0.75                  | -0.01  | 0.01   | 0.43                                                   | 0.31                  | 0.55                  | -0.01  | 0.03   |
|                 | 2017 | 1.11                                                      | 0.98                  | 1.28                  | -0.03  | 0.05   | 0.30                                                   | 0.52                  | 0.80                  | 0.00   | 0.01   | 0.36                                                   | 0.27                  | 0.54                  | -0.01  | 0.02   |
|                 | 2018 | 0.98                                                      | 0.96                  | 1.01                  | -0.04  | 0.07   | 0.24                                                   | 0.55                  | 0.84                  | -0.01  | 0.01   | 0.34                                                   | 0.29                  | 0.56                  | -0.01  | 0.03   |
|                 | 2019 | 0.90                                                      | 0.77                  | 1.07                  | -0.05  | 0.06   | 0.31                                                   | 0.63                  | 0.80                  | -0.01  | 0.02   | 0.53                                                   | 0.23                  | 0.74                  | -0.01  | 0.03   |
|                 | 2020 | 0.70                                                      | 0.56                  | 0.91                  | -0.04  | 0.06   | 0.21                                                   | 0.49                  | 0.81                  | -0.01  | 0.02   | 0.33                                                   | 0.20                  | 0.42                  | -0.01  | 0.06   |
| MW US (LADCO)   | 2011 | 1.31                                                      | 1.26                  | 1.39                  | -0.01  | 0.02   | 0.32                                                   | 0.67                  | 0.76                  | -0.01  | 0.01   | 0.97                                                   | 0.64                  | 1.32                  | -0.01  | 0.02   |
|                 | 2012 | 1.36                                                      | 1.33                  | 1.40                  | -0.02  | 0.05   | 0.27                                                   | 0.77                  | 0.83                  | 0.00   | 0.00   | 0.87                                                   | 0.77                  | 1.10                  | -0.01  | 0.03   |
|                 | 2013 | 1.37                                                      | 1.34                  | 1.41                  | -0.01  | 0.03   | 0.49                                                   | 0.89                  | 0.98                  | 0.00   | 0.00   | 1.10                                                   | 1.08                  | 1.33                  | -0.02  | 0.02   |
|                 | 2014 | 1.37                                                      | 1.34                  | 1.41                  | -0.01  | 0.04   | 0.50                                                   | 0.92                  | 1.01                  | 0.00   | 0.01   | 1.02                                                   | 0.97                  | 1.34                  | -0.02  | 0.02   |
|                 | 2015 | 1.33                                                      | 1.31                  | 1.40                  | -0.03  | 0.04   | 0.41                                                   | 0.82                  | 0.95                  | 0.00   | 0.01   | 0.85                                                   | 0.77                  | 1.36                  | -0.02  | 0.02   |
|                 | 2016 | 1.33                                                      | 1.30                  | 1.41                  | -0.04  | 0.06   | 0.33                                                   | 0.79                  | 0.95                  | 0.00   | 0.01   | 0.84                                                   | 0.58                  | 1.05                  | -0.01  | 0.02   |
|                 | 2017 | 1.32                                                      | 1.25                  | 1.41                  | -0.04  | 0.06   | 0.35                                                   | 0.81                  | 0.95                  | 0.00   | 0.01   | 0.74                                                   | 0.51                  | 1.09                  | -0.01  | 0.02   |
|                 | 2018 | 1.32                                                      | 1.28                  | 1.41                  | -0.04  | 0.05   | 0.39                                                   | 0.90                  | 0.99                  | 0.00   | 0.01   | 0.86                                                   | 0.60                  | 1.21                  | -0.01  | 0.03   |
|                 | 2019 | 1.33                                                      | 1.30                  | 1.40                  | -0.05  | 0.06   | 0.35                                                   | 0.89                  | 1.00                  | 0.00   | 0.01   | 0.96                                                   | 0.66                  | 1.29                  | -0.01  | 0.03   |
|                 | 2020 | 1.20                                                      | 1.12                  | 1.37                  | -0.05  | 0.06   | 0.29                                                   | 0.81                  | 0.91                  | -0.01  | 0.02   | 0.74                                                   | 0.57                  | 1.10                  | -0.02  | 0.03   |
| NE US (MANE-VU) | 2011 | 1.22                                                      | 1.15                  | 1.34                  | -0.01  | 0.01   | 0.30                                                   | 0.46                  | 0.63                  | -0.01  | 0.02   | 1.42                                                   | 1.36                  | 1.45                  | -0.02  | 0.03   |
|                 | 2012 | 1.25                                                      | 1.22                  | 1.36                  | -0.01  | 0.01   | 0.34                                                   | 0.60                  | 0.70                  | -0.01  | 0.01   | 1.35                                                   | 1.17                  | 1.37                  | -0.01  | 0.02   |
|                 | 2013 | 1.29                                                      | 1.24                  | 1.36                  | -0.01  | 0.03   | 0.29                                                   | 0.64                  | 0.79                  | -0.01  | 0.02   | 1.21                                                   | 1.01                  | 1.43                  | -0.02  | 0.03   |
|                 | 2014 | 1.29                                                      | 1.23                  | 1.37                  | -0.01  | 0.02   | 0.38                                                   | 0.71                  | 0.82                  | -0.01  | 0.02   | 1.22                                                   | 1.13                  | 1.45                  | -0.02  | 0.03   |
|                 | 2015 | 1.22                                                      | 1.16                  | 1.37                  | -0.02  | 0.03   | 0.30                                                   | 0.59                  | 0.75                  | -0.01  | 0.03   | 1.26                                                   | 1.01                  | 1.37                  | -0.02  | 0.04   |
|                 | 2016 | 1.27                                                      | 1.25                  | 1.38                  | -0.03  | 0.05   | 0.25                                                   | 0.53                  | 0.71                  | -0.01  | 0.02   | 0.96                                                   | 0.81                  | 1.07                  | -0.02  | 0.03   |
|                 | 2017 | 1.28                                                      | 1.20                  | 1.38                  | -0.02  | 0.06   | 0.33                                                   | 0.64                  | 0.81                  | -0.01  | 0.01   | 1.01                                                   | 0.80                  | 1.24                  | -0.02  | 0.03   |
|                 | 2018 | 1.26                                                      | 1.21                  | 1.36                  | -0.03  | 0.06   | 0.34                                                   | 0.69                  | 0.89                  | -0.01  | 0.02   | 1.07                                                   | 0.90                  | 1.32                  | -0.03  | 0.04   |
|                 | 2019 | 1.24                                                      | 1.12                  | 1.36                  | -0.04  | 0.07   | 0.23                                                   | 0.65                  | 0.84                  | -0.02  | 0.03   | 1.11                                                   | 0.91                  | 1.34                  | -0.03  | 0.06   |
|                 | 2020 | 1.20                                                      | 1.15                  | 1.33                  | -0.05  | 0.06   | 0.18                                                   | 0.60                  | 0.73                  | -0.02  | 0.03   | 0.93                                                   | 0.69                  | 1.13                  | -0.02  | 0.05   |
| SE US (SESARM)  | 2011 | 1.29                                                      | 1.07                  | 1.35                  | -0.01  | 0.04   | 0.30                                                   | 0.38                  | 0.68                  | -0.01  | 0.02   | 0.72                                                   | 0.31                  | 0.90                  | -0.02  | 0.05   |
|                 | 2012 | 1.30                                                      | 1.21                  | 1.36                  | -0.01  | 0.04   | 0.32                                                   | 0.48                  | 0.71                  | -0.01  | 0.01   | 0.72                                                   | 0.35                  | 0.94                  | -0.02  | 0.05   |
|                 | 2013 | 1.29                                                      | 1.24                  | 1.36                  | -0.01  | 0.03   | 0.40                                                   | 0.56                  | 0.83                  | -0.01  | 0.01   | 0.73                                                   | 0.33                  | 0.98                  | -0.02  | 0.05   |
|                 | 2014 | 1.31                                                      | 1.22                  | 1.36                  | -0.01  | 0.03   | 0.38                                                   | 0.56                  | 0.80                  | -0.01  | 0.01   | 0.63                                                   | 0.38                  | 0.92                  | -0.02  | 0.05   |
|                 | 2015 | 1.24                                                      | 1.18                  | 1.36                  | -0.02  | 0.04   | 0.31                                                   | 0.52                  | 0.76                  | -0.01  | 0.02   | 0.60                                                   | 0.37                  | 0.87                  | -0.02  | 0.05   |
|                 | 2016 | 1.28                                                      | 1.19                  | 1.35                  | -0.04  | 0.06   | 0.25                                                   | 0.45                  | 0.71                  | -0.01  | 0.01   | 0.52                                                   | 0.29                  | 0.60                  | -0.01  | 0.04   |
|                 | 2017 | 1.26                                                      | 1.15                  | 1.37                  | -0.04  | 0.06   | 0.25                                                   | 0.47                  | 0.73                  | 0.00   | 0.01   | 0.49                                                   | 0.25                  | 0.66                  | -0.01  | 0.04   |
|                 | 2018 | 1.25                                                      | 1.13                  | 1.35                  | -0.04  | 0.07   | 0.29                                                   | 0.52                  | 0.78                  | -0.01  | 0.02   | 0.68                                                   | 0.28                  | 0.78                  | -0.02  | 0.04   |
|                 | 2019 | 1.25                                                      | 1.15                  | 1.35                  | -0.04  | 0.07   | 0.24                                                   | 0.46                  | 0.75                  | -0.01  | 0.03   | 0.52                                                   | 0.27                  | 0.70                  | -0.02  | 0.05   |
|                 | 2020 | 1.13                                                      | 0.92                  | 1.32                  | -0.05  | 0.07   | 0.27                                                   | 0.45                  | 0.72                  | -0.01  | 0.03   | 0.53                                                   | 0.35                  | 0.64                  | -0.02  | 0.05   |

**Supplementary Table 15. Simulated summer  $\Delta c_{\text{SIA}}/\Delta c_{\text{SO}_4^{2-}}$ ,  $\Delta c_{\text{SIA}}/\Delta c_{\text{NO}_3^-}$ , and  $\Delta c_{\text{SIA}}/\Delta c_{\text{NH}_4^+}$  with 10% reductions.** “W US”, “C US”, “MW US”, “NE US”, “SE US” stand for the Western, Central, Midwestern, Northeastern, Southeastern US, respectively. The 25<sup>th</sup> and 75<sup>th</sup> percentiles (perc) of values from the sites within the corresponding region show their regional variability. Uncertainty lower and upper bounds (Unc LB and Unc UB) are the mean uncertainties (95% CI defined as the 2.5<sup>th</sup> and the 97.5<sup>th</sup> percentiles) of the sites within the region. Uncertainties of each site are estimated using 500 Monte Carlo simulations based on the precisions and detection limits shown in Supplementary Table 7.

| Region             | Year | $\Delta c_{\text{SIA}}/\Delta c_{\text{SO}_4^{2-}}$ (10%) |                       |                       |        |        | $\Delta c_{\text{SIA}}/\Delta c_{\text{NO}_3^-}$ (10%) |                       |                       |        |        | $\Delta c_{\text{SIA}}/\Delta c_{\text{NH}_4^+}$ (10%) |                       |                       |        |        |
|--------------------|------|-----------------------------------------------------------|-----------------------|-----------------------|--------|--------|--------------------------------------------------------|-----------------------|-----------------------|--------|--------|--------------------------------------------------------|-----------------------|-----------------------|--------|--------|
|                    |      | Median                                                    | 25 <sup>th</sup> perc | 75 <sup>th</sup> perc | Unc LB | Unc UB | Median                                                 | 25 <sup>th</sup> perc | 75 <sup>th</sup> perc | Unc LB | Unc UB | Median                                                 | 25 <sup>th</sup> perc | 75 <sup>th</sup> perc | Unc LB | Unc UB |
| W US<br>(WRAP)     | 2011 | 1.31                                                      | 0.71                  | 1.37                  | -0.02  | 0.55   | 0.14                                                   | 0.10                  | 0.17                  | 0.00   | 0.05   | 0.07                                                   | 0.06                  | 0.08                  | 0.00   | 0.00   |
|                    | 2012 | 1.37                                                      | 1.37                  | 1.39                  | -0.04  | 0.32   | 0.13                                                   | 0.11                  | 0.13                  | 0.00   | 0.01   | 0.06                                                   | 0.05                  | 0.07                  | 0.00   | 0.00   |
|                    | 2013 | 1.37                                                      | 1.34                  | 1.41                  | -0.17  | 0.90   | 0.15                                                   | 0.11                  | 0.17                  | 0.00   | 0.13   | 0.06                                                   | 0.05                  | 0.08                  | 0.00   | 0.00   |
|                    | 2014 | 1.36                                                      | 1.28                  | 1.38                  | -0.11  | 0.83   | 0.12                                                   | 0.09                  | 0.20                  | 0.00   | 0.09   | 0.05                                                   | 0.04                  | 0.07                  | 0.00   | 0.00   |
|                    | 2015 | 1.37                                                      | 1.34                  | 1.38                  | -0.05  | 0.32   | 0.09                                                   | 0.07                  | 0.12                  | 0.00   | 0.01   | 0.05                                                   | 0.04                  | 0.07                  | 0.00   | 0.00   |
|                    | 2016 | 1.33                                                      | 1.27                  | 1.37                  | -0.19  | 1.90   | 0.07                                                   | 0.05                  | 0.11                  | 0.00   | 0.15   | 0.04                                                   | 0.02                  | 0.05                  | 0.00   | 0.00   |
|                    | 2017 | 1.37                                                      | 1.27                  | 1.38                  | -0.38  | 1.35   | 0.10                                                   | 0.08                  | 0.13                  | 0.00   | 0.10   | 0.04                                                   | 0.03                  | 0.05                  | 0.00   | 0.00   |
|                    | 2018 | 1.33                                                      | 1.29                  | 1.36                  | -1.09  | 2.32   | 0.13                                                   | 0.10                  | 0.22                  | -0.05  | 0.15   | 0.04                                                   | 0.03                  | 0.05                  | 0.00   | 0.00   |
|                    | 2019 | 1.37                                                      | 1.30                  | 1.37                  | -0.03  | 0.36   | 0.09                                                   | 0.06                  | 0.15                  | 0.00   | 0.01   | 0.04                                                   | 0.03                  | 0.06                  | 0.00   | 0.00   |
|                    | 2020 | 1.33                                                      | 1.10                  | 1.35                  | -1.07  | 1.59   | 0.08                                                   | 0.05                  | 0.11                  | -0.09  | 0.13   | 0.03                                                   | 0.02                  | 0.04                  | 0.00   | 0.00   |
| C US<br>(CENSARA)  | 2011 | 1.32                                                      | 1.31                  | 1.33                  | 0.00   | 0.00   | 0.13                                                   | 0.12                  | 0.14                  | 0.00   | 0.00   | 0.16                                                   | 0.12                  | 0.20                  | -0.01  | 0.04   |
|                    | 2012 | 1.36                                                      | 1.34                  | 1.37                  | 0.00   | 0.01   | 0.11                                                   | 0.10                  | 0.13                  | 0.00   | 0.00   | 0.08                                                   | 0.07                  | 0.12                  | 0.00   | 0.00   |
|                    | 2013 | 1.35                                                      | 1.33                  | 1.36                  | -0.01  | 0.03   | 0.23                                                   | 0.22                  | 0.24                  | -0.01  | 0.01   | 0.12                                                   | 0.11                  | 0.16                  | 0.00   | 0.00   |
|                    | 2014 | 1.36                                                      | 1.34                  | 1.37                  | 0.00   | 0.02   | 0.33                                                   | 0.29                  | 0.35                  | -0.01  | 0.01   | 0.12                                                   | 0.11                  | 0.14                  | 0.00   | 0.00   |
|                    | 2015 | 1.34                                                      | 1.32                  | 1.37                  | -0.02  | 0.03   | 0.28                                                   | 0.17                  | 0.36                  | -0.01  | 0.01   | 0.12                                                   | 0.12                  | 0.14                  | 0.00   | 0.01   |
|                    | 2016 | 1.35                                                      | 1.34                  | 1.38                  | -0.02  | 0.08   | 0.25                                                   | 0.15                  | 0.31                  | -0.01  | 0.01   | 0.09                                                   | 0.07                  | 0.11                  | 0.00   | 0.01   |
|                    | 2017 | 1.37                                                      | 1.34                  | 1.40                  | -0.01  | 0.06   | 0.31                                                   | 0.19                  | 0.36                  | 0.00   | 0.01   | 0.07                                                   | 0.07                  | 0.12                  | 0.00   | 0.00   |
|                    | 2018 | 1.34                                                      | 1.32                  | 1.37                  | -0.08  | 0.30   | 0.24                                                   | 0.14                  | 0.31                  | -0.01  | 0.01   | 0.08                                                   | 0.06                  | 0.14                  | 0.00   | 0.01   |
|                    | 2019 | 1.35                                                      | 1.33                  | 1.37                  | -0.03  | 0.15   | 0.33                                                   | 0.22                  | 0.40                  | -0.01  | 0.01   | 0.10                                                   | 0.08                  | 0.12                  | 0.00   | 0.01   |
|                    | 2020 | 1.35                                                      | 1.27                  | 1.36                  | -0.13  | 0.36   | 0.21                                                   | 0.16                  | 0.30                  | -0.01  | 0.02   | 0.09                                                   | 0.08                  | 0.11                  | 0.00   | 0.05   |
| MW US<br>(LADCO)   | 2011 | 1.34                                                      | 1.30                  | 1.37                  | 0.00   | 0.01   | 0.32                                                   | 0.30                  | 0.38                  | 0.00   | 0.01   | 0.27                                                   | 0.17                  | 0.37                  | 0.00   | 0.01   |
|                    | 2012 | 1.38                                                      | 1.37                  | 1.39                  | 0.00   | 0.02   | 0.28                                                   | 0.26                  | 0.37                  | 0.00   | 0.01   | 0.14                                                   | 0.11                  | 0.20                  | 0.00   | 0.00   |
|                    | 2013 | 1.37                                                      | 1.36                  | 1.39                  | 0.00   | 0.01   | 0.51                                                   | 0.41                  | 0.57                  | 0.00   | 0.01   | 0.17                                                   | 0.14                  | 0.26                  | 0.00   | 0.00   |
|                    | 2014 | 1.37                                                      | 1.36                  | 1.39                  | 0.00   | 0.01   | 0.52                                                   | 0.46                  | 0.55                  | 0.00   | 0.01   | 0.14                                                   | 0.11                  | 0.21                  | 0.00   | 0.00   |
|                    | 2015 | 1.37                                                      | 1.36                  | 1.39                  | 0.00   | 0.01   | 0.43                                                   | 0.35                  | 0.48                  | -0.01  | 0.01   | 0.16                                                   | 0.11                  | 0.20                  | 0.00   | 0.00   |
|                    | 2016 | 1.39                                                      | 1.38                  | 1.41                  | -0.01  | 0.06   | 0.35                                                   | 0.29                  | 0.47                  | 0.00   | 0.01   | 0.11                                                   | 0.07                  | 0.12                  | 0.00   | 0.00   |
|                    | 2017 | 1.40                                                      | 1.38                  | 1.41                  | -0.01  | 0.05   | 0.38                                                   | 0.29                  | 0.45                  | 0.00   | 0.01   | 0.09                                                   | 0.07                  | 0.11                  | 0.00   | 0.00   |
|                    | 2018 | 1.39                                                      | 1.37                  | 1.41                  | -0.01  | 0.06   | 0.40                                                   | 0.33                  | 0.51                  | -0.01  | 0.02   | 0.10                                                   | 0.07                  | 0.12                  | 0.00   | 0.00   |
|                    | 2019 | 1.41                                                      | 1.38                  | 1.42                  | -0.01  | 0.11   | 0.38                                                   | 0.31                  | 0.50                  | -0.01  | 0.01   | 0.09                                                   | 0.07                  | 0.12                  | 0.00   | 0.00   |
|                    | 2020 | 1.39                                                      | 1.37                  | 1.40                  | -0.01  | 0.51   | 0.32                                                   | 0.26                  | 0.36                  | -0.01  | 0.02   | 0.08                                                   | 0.07                  | 0.13                  | 0.00   | 0.00   |
| NE US<br>(MANE-VU) | 2011 | 1.26                                                      | 1.20                  | 1.30                  | 0.00   | 0.01   | 0.27                                                   | 0.25                  | 0.29                  | -0.01  | 0.01   | 0.45                                                   | 0.22                  | 0.64                  | -0.01  | 0.07   |
|                    | 2012 | 1.32                                                      | 1.30                  | 1.35                  | 0.00   | 0.00   | 0.36                                                   | 0.21                  | 0.38                  | 0.00   | 0.01   | 0.22                                                   | 0.18                  | 0.31                  | 0.00   | 0.01   |
|                    | 2013 | 1.34                                                      | 1.32                  | 1.34                  | 0.00   | 0.00   | 0.29                                                   | 0.25                  | 0.42                  | -0.01  | 0.01   | 0.19                                                   | 0.15                  | 0.26                  | 0.00   | 0.01   |
|                    | 2014 | 1.35                                                      | 1.34                  | 1.36                  | 0.00   | 0.01   | 0.39                                                   | 0.32                  | 0.41                  | -0.01  | 0.01   | 0.15                                                   | 0.10                  | 0.21                  | 0.00   | 0.00   |
|                    | 2015 | 1.35                                                      | 1.34                  | 1.36                  | 0.00   | 0.00   | 0.31                                                   | 0.17                  | 0.36                  | 0.00   | 0.01   | 0.14                                                   | 0.10                  | 0.18                  | 0.00   | 0.01   |
|                    | 2016 | 1.36                                                      | 1.35                  | 1.37                  | 0.00   | 0.01   | 0.26                                                   | 0.18                  | 0.32                  | 0.00   | 0.01   | 0.11                                                   | 0.09                  | 0.14                  | 0.00   | 0.00   |
|                    | 2017 | 1.37                                                      | 1.35                  | 1.37                  | 0.00   | 0.02   | 0.34                                                   | 0.23                  | 0.51                  | -0.01  | 0.01   | 0.11                                                   | 0.08                  | 0.13                  | 0.00   | 0.00   |
|                    | 2018 | 1.35                                                      | 1.33                  | 1.36                  | 0.00   | 0.06   | 0.35                                                   | 0.19                  | 0.41                  | -0.01  | 0.02   | 0.11                                                   | 0.08                  | 0.14                  | 0.00   | 0.01   |
|                    | 2019 | 1.36                                                      | 1.35                  | 1.37                  | 0.00   | 0.08   | 0.24                                                   | 0.15                  | 0.32                  | -0.01  | 0.01   | 0.09                                                   | 0.07                  | 0.11                  | 0.00   | 0.01   |
|                    | 2020 | 1.35                                                      | 1.34                  | 1.36                  | -0.01  | 0.10   | 0.18                                                   | 0.16                  | 0.32                  | -0.01  | 0.02   | 0.08                                                   | 0.08                  | 0.11                  | 0.00   | 0.01   |
| SE US<br>(SESARM)  | 2011 | 1.30                                                      | 0.94                  | 1.32                  | 0.00   | 0.26   | 0.30                                                   | 0.20                  | 0.51                  | 0.00   | 0.03   | 0.20                                                   | 0.12                  | 0.22                  | 0.00   | 0.12   |
|                    | 2012 | 1.33                                                      | 1.23                  | 1.35                  | 0.00   | 0.02   | 0.32                                                   | 0.19                  | 0.39                  | 0.00   | 0.01   | 0.14                                                   | 0.12                  | 0.16                  | 0.00   | 0.01   |
|                    | 2013 | 1.33                                                      | 1.26                  | 1.35                  | 0.00   | 0.04   | 0.41                                                   | 0.21                  | 0.53                  | -0.01  | 0.02   | 0.11                                                   | 0.09                  | 0.16                  | 0.00   | 0.01   |
|                    | 2014 | 1.33                                                      | 1.22                  | 1.35                  | 0.00   | 0.01   | 0.38                                                   | 0.24                  | 0.50                  | -0.01  | 0.01   | 0.11                                                   | 0.08                  | 0.16                  | 0.00   | 0.00   |
|                    | 2015 | 1.33                                                      | 1.30                  | 1.36                  | 0.00   | 0.05   | 0.32                                                   | 0.16                  | 0.51                  | -0.01  | 0.01   | 0.11                                                   | 0.08                  | 0.13                  | 0.00   | 0.01   |
|                    | 2016 | 1.35                                                      | 1.33                  | 1.36                  | 0.00   | 0.02   | 0.25                                                   | 0.17                  | 0.39                  | -0.01  | 0.01   | 0.09                                                   | 0.06                  | 0.11                  | 0.00   | 0.01   |
|                    | 2017 | 1.36                                                      | 1.34                  | 1.37                  | 0.00   | 0.01   | 0.26                                                   | 0.20                  | 0.39                  | 0.00   | 0.01   | 0.08                                                   | 0.05                  | 0.11                  | 0.00   | 0.00   |
|                    | 2018 | 1.35                                                      | 1.34                  | 1.36                  | 0.00   | 0.02   | 0.30                                                   | 0.19                  | 0.44                  | -0.01  | 0.01   | 0.08                                                   | 0.06                  | 0.11                  | 0.00   | 0.01   |
|                    | 2019 | 1.35                                                      | 1.33                  | 1.36                  | 0.00   | 0.03   | 0.25                                                   | 0.18                  | 0.41                  | -0.01  | 0.01   | 0.09                                                   | 0.06                  | 0.11                  | 0.00   | 0.01   |
|                    | 2020 | 1.35                                                      | 1.31                  | 1.36                  | -0.01  | 0.22   | 0.29                                                   | 0.14                  | 0.44                  | -0.01  | 0.02   | 0.09                                                   | 0.07                  | 0.13                  | 0.00   | 0.01   |

**Supplementary Table 16. Simulated summer  $\Delta c_{\text{SIA}}/\Delta c_{\text{SO}_4^{2-}}$ ,  $\Delta c_{\text{SIA}}/\Delta c_{\text{NO}_3^-}$ , and  $\Delta c_{\text{SIA}}/\Delta c_{\text{NH}_4^+}$  with 40% reductions.** “W US”, “C US”, “MW US”, “NE US”, “SE US” stand for the Western, Central, Midwestern, Northeastern, Southeastern US, respectively. The 25<sup>th</sup> and 75<sup>th</sup> percentiles (perc) of values from the sites within the corresponding region show their regional variability. Uncertainty lower and upper bounds (Unc LB and Unc UB) are the mean uncertainties (95% CI defined as the 2.5<sup>th</sup> and the 97.5<sup>th</sup> percentiles) of the sites within the region. Uncertainties of each site are estimated using 500 Monte Carlo simulations based on the precisions and detection limits shown in Supplementary Table 7.

| RPO             | Year | $\Delta c_{\text{SIA}}/\Delta c_{\text{SO}_4^{2-}}$ (40%) |                       |                       |        |        | $\Delta c_{\text{SIA}}/\Delta c_{\text{NO}_3^-}$ (40%) |                       |                       |        |        | $\Delta c_{\text{SIA}}/\Delta c_{\text{NH}_4^+}$ (40%) |                       |                       |        |        |
|-----------------|------|-----------------------------------------------------------|-----------------------|-----------------------|--------|--------|--------------------------------------------------------|-----------------------|-----------------------|--------|--------|--------------------------------------------------------|-----------------------|-----------------------|--------|--------|
|                 |      | Median                                                    | 25 <sup>th</sup> perc | 75 <sup>th</sup> perc | Unc LB | Unc UB | Median                                                 | 25 <sup>th</sup> perc | 75 <sup>th</sup> perc | Unc LB | Unc UB | Median                                                 | 25 <sup>th</sup> perc | 75 <sup>th</sup> perc | Unc LB | Unc UB |
| W US (WRAP)     | 2011 | 1.19                                                      | 0.96                  | 1.36                  | -0.05  | 0.29   | 0.14                                                   | 0.10                  | 0.17                  | 0.00   | 0.04   | 0.08                                                   | 0.06                  | 0.10                  | 0.00   | 0.00   |
|                 | 2012 | 1.36                                                      | 1.35                  | 1.38                  | -0.06  | 0.33   | 0.12                                                   | 0.11                  | 0.13                  | 0.00   | 0.01   | 0.07                                                   | 0.05                  | 0.08                  | 0.00   | 0.00   |
|                 | 2013 | 1.35                                                      | 1.33                  | 1.36                  | -0.12  | 0.29   | 0.15                                                   | 0.11                  | 0.17                  | 0.00   | 0.11   | 0.07                                                   | 0.06                  | 0.09                  | 0.00   | 0.00   |
|                 | 2014 | 1.22                                                      | 1.07                  | 1.37                  | -0.22  | 0.43   | 0.11                                                   | 0.09                  | 0.20                  | 0.00   | 0.08   | 0.06                                                   | 0.04                  | 0.09                  | 0.00   | 0.00   |
|                 | 2015 | 1.35                                                      | 1.34                  | 1.37                  | -0.09  | 0.22   | 0.09                                                   | 0.07                  | 0.12                  | 0.00   | 0.01   | 0.05                                                   | 0.05                  | 0.09                  | 0.00   | 0.00   |
|                 | 2016 | 1.27                                                      | 1.19                  | 1.31                  | -0.39  | 0.69   | 0.07                                                   | 0.05                  | 0.11                  | 0.00   | 0.13   | 0.04                                                   | 0.02                  | 0.06                  | 0.00   | 0.00   |
|                 | 2017 | 1.09                                                      | 0.92                  | 1.36                  | -0.32  | 0.53   | 0.10                                                   | 0.08                  | 0.13                  | 0.00   | 0.10   | 0.04                                                   | 0.03                  | 0.06                  | 0.00   | 0.00   |
|                 | 2018 | 0.78                                                      | 0.62                  | 1.22                  | -0.47  | 0.67   | 0.12                                                   | 0.10                  | 0.22                  | -0.05  | 0.16   | 0.04                                                   | 0.03                  | 0.05                  | 0.00   | 0.00   |
|                 | 2019 | 1.35                                                      | 1.19                  | 1.36                  | -0.11  | 0.30   | 0.09                                                   | 0.06                  | 0.15                  | -0.01  | 0.01   | 0.04                                                   | 0.03                  | 0.06                  | 0.00   | 0.00   |
|                 | 2020 | 0.78                                                      | 0.29                  | 1.24                  | -0.38  | 0.51   | 0.08                                                   | 0.05                  | 0.11                  | -0.11  | 0.15   | 0.03                                                   | 0.02                  | 0.05                  | 0.00   | 0.00   |
| C US (CENSARA)  | 2011 | 1.33                                                      | 1.32                  | 1.34                  | 0.00   | 0.01   | 0.13                                                   | 0.13                  | 0.14                  | 0.00   | 0.00   | 0.30                                                   | 0.20                  | 0.39                  | -0.01  | 0.02   |
|                 | 2012 | 1.36                                                      | 1.35                  | 1.37                  | 0.00   | 0.09   | 0.11                                                   | 0.10                  | 0.13                  | 0.00   | 0.00   | 0.10                                                   | 0.09                  | 0.13                  | 0.00   | 0.01   |
|                 | 2013 | 1.35                                                      | 1.33                  | 1.35                  | -0.03  | 0.08   | 0.22                                                   | 0.21                  | 0.24                  | -0.01  | 0.01   | 0.13                                                   | 0.13                  | 0.15                  | 0.00   | 0.05   |
|                 | 2014 | 1.36                                                      | 1.34                  | 1.36                  | -0.01  | 0.05   | 0.32                                                   | 0.28                  | 0.35                  | -0.01  | 0.01   | 0.15                                                   | 0.14                  | 0.18                  | 0.00   | 0.01   |
|                 | 2015 | 1.33                                                      | 1.32                  | 1.37                  | -0.05  | 0.12   | 0.27                                                   | 0.17                  | 0.36                  | -0.01  | 0.01   | 0.14                                                   | 0.13                  | 0.18                  | 0.00   | 0.01   |
|                 | 2016 | 1.34                                                      | 1.32                  | 1.38                  | -0.06  | 0.21   | 0.24                                                   | 0.15                  | 0.30                  | -0.01  | 0.01   | 0.10                                                   | 0.08                  | 0.15                  | 0.00   | 0.01   |
|                 | 2017 | 1.36                                                      | 1.34                  | 1.37                  | -0.03  | 0.18   | 0.30                                                   | 0.19                  | 0.36                  | 0.00   | 0.01   | 0.09                                                   | 0.08                  | 0.16                  | 0.00   | 0.01   |
|                 | 2018 | 1.31                                                      | 1.17                  | 1.37                  | -0.11  | 0.34   | 0.24                                                   | 0.15                  | 0.30                  | -0.01  | 0.01   | 0.07                                                   | 0.05                  | 0.10                  | 0.00   | 0.01   |
|                 | 2019 | 1.34                                                      | 1.32                  | 1.36                  | -0.05  | 0.37   | 0.32                                                   | 0.22                  | 0.40                  | -0.01  | 0.01   | 0.10                                                   | 0.07                  | 0.11                  | 0.00   | 0.03   |
|                 | 2020 | 1.29                                                      | 1.17                  | 1.35                  | -0.12  | 0.27   | 0.20                                                   | 0.15                  | 0.29                  | -0.01  | 0.02   | 0.09                                                   | 0.06                  | 0.11                  | 0.00   | 0.06   |
| MW US (LADCO)   | 2011 | 1.36                                                      | 1.33                  | 1.38                  | 0.00   | 0.02   | 0.32                                                   | 0.30                  | 0.38                  | 0.00   | 0.01   | 0.32                                                   | 0.20                  | 0.48                  | 0.00   | 0.01   |
|                 | 2012 | 1.39                                                      | 1.39                  | 1.40                  | 0.00   | 0.11   | 0.28                                                   | 0.26                  | 0.36                  | 0.00   | 0.01   | 0.17                                                   | 0.13                  | 0.24                  | 0.00   | 0.00   |
|                 | 2013 | 1.38                                                      | 1.38                  | 1.40                  | 0.00   | 0.01   | 0.50                                                   | 0.41                  | 0.55                  | 0.00   | 0.01   | 0.24                                                   | 0.18                  | 0.33                  | 0.00   | 0.00   |
|                 | 2014 | 1.38                                                      | 1.37                  | 1.40                  | 0.00   | 0.01   | 0.51                                                   | 0.46                  | 0.54                  | 0.00   | 0.01   | 0.19                                                   | 0.13                  | 0.30                  | 0.00   | 0.00   |
|                 | 2015 | 1.39                                                      | 1.37                  | 1.40                  | 0.00   | 0.02   | 0.42                                                   | 0.35                  | 0.47                  | -0.01  | 0.01   | 0.21                                                   | 0.14                  | 0.26                  | 0.00   | 0.01   |
|                 | 2016 | 1.40                                                      | 1.39                  | 1.41                  | -0.01  | 0.19   | 0.34                                                   | 0.29                  | 0.46                  | 0.00   | 0.01   | 0.13                                                   | 0.09                  | 0.15                  | 0.00   | 0.00   |
|                 | 2017 | 1.40                                                      | 1.38                  | 1.42                  | -0.01  | 0.15   | 0.36                                                   | 0.28                  | 0.43                  | 0.00   | 0.01   | 0.11                                                   | 0.08                  | 0.13                  | 0.00   | 0.00   |
|                 | 2018 | 1.39                                                      | 1.38                  | 1.41                  | -0.02  | 0.21   | 0.40                                                   | 0.32                  | 0.50                  | -0.01  | 0.02   | 0.12                                                   | 0.08                  | 0.15                  | 0.00   | 0.00   |
|                 | 2019 | 1.40                                                      | 1.39                  | 1.42                  | -0.01  | 0.28   | 0.37                                                   | 0.30                  | 0.49                  | -0.01  | 0.01   | 0.11                                                   | 0.09                  | 0.13                  | 0.00   | 0.00   |
|                 | 2020 | 1.39                                                      | 1.37                  | 1.40                  | -0.09  | 0.28   | 0.31                                                   | 0.25                  | 0.35                  | -0.01  | 0.03   | 0.09                                                   | 0.08                  | 0.15                  | 0.00   | 0.01   |
| NE US (MANE-VU) | 2011 | 1.30                                                      | 1.26                  | 1.32                  | 0.00   | 0.01   | 0.28                                                   | 0.26                  | 0.30                  | -0.01  | 0.01   | 0.73                                                   | 0.30                  | 0.89                  | -0.02  | 0.06   |
|                 | 2012 | 1.34                                                      | 1.32                  | 1.36                  | 0.00   | 0.00   | 0.35                                                   | 0.21                  | 0.39                  | 0.00   | 0.01   | 0.32                                                   | 0.23                  | 0.49                  | -0.01  | 0.02   |
|                 | 2013 | 1.34                                                      | 1.33                  | 1.35                  | 0.00   | 0.00   | 0.29                                                   | 0.24                  | 0.42                  | 0.00   | 0.01   | 0.27                                                   | 0.22                  | 0.39                  | -0.01  | 0.03   |
|                 | 2014 | 1.35                                                      | 1.34                  | 1.36                  | 0.00   | 0.02   | 0.39                                                   | 0.32                  | 0.40                  | -0.01  | 0.01   | 0.19                                                   | 0.13                  | 0.26                  | 0.00   | 0.01   |
|                 | 2015 | 1.35                                                      | 1.34                  | 1.37                  | 0.00   | 0.01   | 0.30                                                   | 0.16                  | 0.36                  | 0.00   | 0.01   | 0.18                                                   | 0.11                  | 0.22                  | 0.00   | 0.01   |
|                 | 2016 | 1.36                                                      | 1.35                  | 1.38                  | 0.00   | 0.04   | 0.25                                                   | 0.18                  | 0.31                  | 0.00   | 0.01   | 0.13                                                   | 0.11                  | 0.16                  | 0.00   | 0.00   |
|                 | 2017 | 1.37                                                      | 1.35                  | 1.38                  | 0.00   | 0.04   | 0.34                                                   | 0.22                  | 0.50                  | -0.01  | 0.01   | 0.12                                                   | 0.10                  | 0.16                  | 0.00   | 0.01   |
|                 | 2018 | 1.35                                                      | 1.32                  | 1.37                  | 0.00   | 0.08   | 0.35                                                   | 0.18                  | 0.41                  | -0.01  | 0.02   | 0.13                                                   | 0.09                  | 0.16                  | -0.01  | 0.02   |
|                 | 2019 | 1.36                                                      | 1.35                  | 1.37                  | 0.00   | 0.08   | 0.23                                                   | 0.15                  | 0.31                  | -0.01  | 0.01   | 0.10                                                   | 0.08                  | 0.12                  | 0.00   | 0.01   |
|                 | 2020 | 1.34                                                      | 1.29                  | 1.36                  | -0.02  | 0.13   | 0.18                                                   | 0.16                  | 0.31                  | -0.01  | 0.01   | 0.10                                                   | 0.09                  | 0.15                  | 0.00   | 0.01   |
| SE US (SESARM)  | 2011 | 1.32                                                      | 1.07                  | 1.34                  | 0.00   | 0.07   | 0.30                                                   | 0.20                  | 0.52                  | 0.00   | 0.03   | 0.27                                                   | 0.14                  | 0.46                  | -0.03  | 0.06   |
|                 | 2012 | 1.34                                                      | 1.19                  | 1.36                  | 0.00   | 0.02   | 0.32                                                   | 0.19                  | 0.38                  | 0.00   | 0.01   | 0.17                                                   | 0.14                  | 0.19                  | -0.01  | 0.12   |
|                 | 2013 | 1.34                                                      | 1.18                  | 1.35                  | 0.00   | 0.04   | 0.40                                                   | 0.21                  | 0.53                  | -0.01  | 0.02   | 0.12                                                   | 0.07                  | 0.17                  | 0.00   | 0.04   |
|                 | 2014 | 1.34                                                      | 1.28                  | 1.35                  | 0.00   | 0.02   | 0.38                                                   | 0.24                  | 0.51                  | -0.01  | 0.01   | 0.15                                                   | 0.09                  | 0.22                  | 0.00   | 0.01   |
|                 | 2015 | 1.34                                                      | 1.25                  | 1.36                  | 0.00   | 0.07   | 0.31                                                   | 0.16                  | 0.52                  | -0.01  | 0.01   | 0.12                                                   | 0.08                  | 0.18                  | 0.00   | 0.03   |
|                 | 2016 | 1.35                                                      | 1.33                  | 1.37                  | -0.01  | 0.05   | 0.25                                                   | 0.17                  | 0.39                  | 0.00   | 0.01   | 0.12                                                   | 0.07                  | 0.13                  | 0.00   | 0.01   |
|                 | 2017 | 1.36                                                      | 1.34                  | 1.38                  | 0.00   | 0.04   | 0.26                                                   | 0.19                  | 0.39                  | 0.00   | 0.01   | 0.10                                                   | 0.05                  | 0.13                  | 0.00   | 0.01   |
|                 | 2018 | 1.35                                                      | 1.33                  | 1.37                  | -0.01  | 0.04   | 0.30                                                   | 0.19                  | 0.43                  | -0.01  | 0.01   | 0.11                                                   | 0.06                  | 0.14                  | 0.00   | 0.02   |
|                 | 2019 | 1.35                                                      | 1.32                  | 1.36                  | -0.01  | 0.07   | 0.25                                                   | 0.18                  | 0.41                  | -0.01  | 0.01   | 0.11                                                   | 0.06                  | 0.13                  | 0.00   | 0.02   |
|                 | 2020 | 1.33                                                      | 1.30                  | 1.36                  | -0.05  | 0.13   | 0.28                                                   | 0.14                  | 0.44                  | -0.01  | 0.02   | 0.10                                                   | 0.06                  | 0.14                  | 0.00   | 0.04   |

**Supplementary Table 17. Simulated summer  $\Delta c_{\text{SIA}}/\Delta c_{\text{SO}_4^{2-}}$ ,  $\Delta c_{\text{SIA}}/\Delta c_{\text{NO}_3^-}$ , and  $\Delta c_{\text{SIA}}/\Delta c_{\text{NH}_4^+}$  with 70% reductions.** “W US”, “C US”, “MW US”, “NE US”, “SE US” stand for the Western, Central, Midwestern, Northeastern, Southeastern US, respectively. The 25<sup>th</sup> and 75<sup>th</sup> percentiles (perc) of values from the sites within the corresponding region show their regional variability. Uncertainty lower and upper bounds (Unc LB and Unc UB) are the mean uncertainties (95% CI defined as the 2.5<sup>th</sup> and the 97.5<sup>th</sup> percentiles) of the sites within the region. Uncertainties of each site are estimated using 500 Monte Carlo simulations based on the precisions and detection limits shown in Supplementary Table 7.

| Region          | Year | $\Delta c_{\text{SIA}}/\Delta c_{\text{SO}_4^{2-}}$ (70%) |                       |                       |        |        | $\Delta c_{\text{SIA}}/\Delta c_{\text{NO}_3^-}$ (70%) |                       |                       |        |        | $\Delta c_{\text{SIA}}/\Delta c_{\text{NH}_4^+}$ (70%) |                       |                       |        |        |
|-----------------|------|-----------------------------------------------------------|-----------------------|-----------------------|--------|--------|--------------------------------------------------------|-----------------------|-----------------------|--------|--------|--------------------------------------------------------|-----------------------|-----------------------|--------|--------|
|                 |      | Median                                                    | 25 <sup>th</sup> perc | 75 <sup>th</sup> perc | Unc LB | Unc UB | Median                                                 | 25 <sup>th</sup> perc | 75 <sup>th</sup> perc | Unc LB | Unc UB | Median                                                 | 25 <sup>th</sup> perc | 75 <sup>th</sup> perc | Unc LB | Unc UB |
| W US (WRAP)     | 2011 | 1.00                                                      | 0.65                  | 1.24                  | -0.16  | 0.29   | 0.14                                                   | 0.10                  | 0.17                  | 0.00   | 0.03   | 0.08                                                   | 0.06                  | 0.11                  | 0.00   | 0.01   |
|                 | 2012 | 1.21                                                      | 0.92                  | 1.24                  | -0.22  | 0.36   | 0.12                                                   | 0.10                  | 0.13                  | 0.00   | 0.01   | 0.07                                                   | 0.06                  | 0.09                  | 0.00   | 0.00   |
|                 | 2013 | 1.00                                                      | 0.83                  | 1.06                  | -0.16  | 0.27   | 0.14                                                   | 0.11                  | 0.17                  | 0.00   | 0.11   | 0.08                                                   | 0.06                  | 0.11                  | 0.00   | 0.00   |
|                 | 2014 | 0.58                                                      | 0.28                  | 1.05                  | -0.11  | 0.21   | 0.11                                                   | 0.08                  | 0.20                  | 0.00   | 0.09   | 0.07                                                   | 0.04                  | 0.11                  | 0.00   | 0.01   |
|                 | 2015 | 1.00                                                      | 0.79                  | 1.17                  | -0.11  | 0.25   | 0.08                                                   | 0.07                  | 0.12                  | 0.00   | 0.01   | 0.05                                                   | 0.05                  | 0.09                  | 0.00   | 0.00   |
|                 | 2016 | -0.30                                                     | -0.87                 | 0.82                  | -0.15  | 0.26   | 0.07                                                   | 0.05                  | 0.10                  | 0.00   | 0.13   | 0.05                                                   | 0.02                  | 0.06                  | 0.00   | 0.00   |
|                 | 2017 | 0.12                                                      | -0.22                 | 0.60                  | -0.13  | 0.23   | 0.09                                                   | 0.08                  | 0.13                  | -0.01  | 0.11   | 0.04                                                   | 0.03                  | 0.06                  | 0.00   | 0.00   |
|                 | 2018 | -0.55                                                     | -0.88                 | -0.15                 | -0.20  | 0.31   | 0.12                                                   | 0.10                  | 0.22                  | -0.06  | 0.16   | 0.04                                                   | 0.03                  | 0.06                  | 0.00   | 0.01   |
|                 | 2019 | 0.84                                                      | 0.18                  | 1.18                  | -0.09  | 0.25   | 0.09                                                   | 0.06                  | 0.14                  | -0.01  | 0.01   | 0.04                                                   | 0.03                  | 0.07                  | 0.00   | 0.01   |
|                 | 2020 | -0.10                                                     | -0.98                 | 0.27                  | -0.16  | 0.24   | 0.08                                                   | 0.05                  | 0.11                  | -0.10  | 0.14   | 0.04                                                   | 0.02                  | 0.06                  | 0.00   | 0.00   |
| C US (CENSARA)  | 2011 | 1.31                                                      | 1.29                  | 1.33                  | -0.02  | 0.02   | 0.13                                                   | 0.13                  | 0.14                  | 0.00   | 0.00   | 0.41                                                   | 0.30                  | 0.51                  | -0.04  | 0.04   |
|                 | 2012 | 1.33                                                      | 1.21                  | 1.34                  | -0.04  | 0.13   | 0.11                                                   | 0.10                  | 0.12                  | 0.00   | 0.00   | 0.11                                                   | 0.10                  | 0.24                  | -0.01  | 0.05   |
|                 | 2013 | 1.30                                                      | 1.29                  | 1.31                  | -0.06  | 0.09   | 0.22                                                   | 0.21                  | 0.23                  | -0.01  | 0.01   | 0.22                                                   | 0.19                  | 0.36                  | -0.04  | 0.05   |
|                 | 2014 | 1.28                                                      | 1.24                  | 1.32                  | -0.06  | 0.15   | 0.31                                                   | 0.27                  | 0.34                  | -0.01  | 0.01   | 0.19                                                   | 0.15                  | 0.28                  | -0.04  | 0.07   |
|                 | 2015 | 1.24                                                      | 1.19                  | 1.33                  | -0.10  | 0.18   | 0.27                                                   | 0.17                  | 0.36                  | -0.01  | 0.01   | 0.16                                                   | 0.04                  | 0.19                  | -0.02  | 0.09   |
|                 | 2016 | 1.09                                                      | 0.70                  | 1.20                  | -0.09  | 0.17   | 0.24                                                   | 0.15                  | 0.29                  | -0.01  | 0.01   | 0.10                                                   | 0.09                  | 0.10                  | 0.00   | 0.07   |
|                 | 2017 | 1.18                                                      | 1.03                  | 1.28                  | -0.04  | 0.08   | 0.30                                                   | 0.19                  | 0.35                  | -0.01  | 0.01   | 0.13                                                   | 0.09                  | 0.15                  | 0.00   | 0.02   |
|                 | 2018 | 0.56                                                      | 0.43                  | 1.01                  | -0.06  | 0.13   | 0.24                                                   | 0.16                  | 0.29                  | -0.01  | 0.02   | 0.07                                                   | 0.06                  | 0.10                  | 0.00   | 0.07   |
|                 | 2019 | 0.49                                                      | 0.17                  | 1.07                  | -0.08  | 0.13   | 0.31                                                   | 0.21                  | 0.39                  | -0.01  | 0.01   | 0.12                                                   | 0.09                  | 0.14                  | 0.00   | 0.04   |
|                 | 2020 | 0.63                                                      | 0.43                  | 0.91                  | -0.06  | 0.13   | 0.21                                                   | 0.16                  | 0.28                  | -0.01  | 0.03   | 0.07                                                   | -0.01                 | 0.11                  | 0.00   | 0.17   |
| MW US (LADCO)   | 2011 | 1.38                                                      | 1.36                  | 1.39                  | 0.00   | 0.03   | 0.32                                                   | 0.30                  | 0.37                  | 0.00   | 0.01   | 0.44                                                   | 0.29                  | 0.62                  | -0.01  | 0.03   |
|                 | 2012 | 1.40                                                      | 1.36                  | 1.40                  | -0.04  | 0.13   | 0.27                                                   | 0.26                  | 0.35                  | 0.00   | 0.01   | 0.25                                                   | 0.17                  | 0.32                  | 0.00   | 0.04   |
|                 | 2013 | 1.40                                                      | 1.40                  | 1.41                  | -0.02  | 0.06   | 0.49                                                   | 0.41                  | 0.54                  | 0.00   | 0.01   | 0.44                                                   | 0.27                  | 0.48                  | -0.01  | 0.03   |
|                 | 2014 | 1.39                                                      | 1.38                  | 1.41                  | -0.03  | 0.07   | 0.50                                                   | 0.45                  | 0.53                  | 0.00   | 0.01   | 0.33                                                   | 0.20                  | 0.40                  | -0.01  | 0.02   |
|                 | 2015 | 1.38                                                      | 1.37                  | 1.40                  | -0.05  | 0.10   | 0.41                                                   | 0.34                  | 0.46                  | -0.01  | 0.01   | 0.26                                                   | 0.21                  | 0.39                  | 0.00   | 0.03   |
|                 | 2016 | 1.39                                                      | 1.38                  | 1.41                  | -0.09  | 0.14   | 0.33                                                   | 0.28                  | 0.45                  | 0.00   | 0.01   | 0.16                                                   | 0.14                  | 0.19                  | 0.00   | 0.01   |
|                 | 2017 | 1.39                                                      | 1.21                  | 1.41                  | -0.12  | 0.17   | 0.35                                                   | 0.27                  | 0.42                  | -0.01  | 0.01   | 0.14                                                   | 0.11                  | 0.18                  | 0.00   | 0.01   |
|                 | 2018 | 1.39                                                      | 1.16                  | 1.41                  | -0.11  | 0.16   | 0.39                                                   | 0.31                  | 0.48                  | -0.01  | 0.02   | 0.17                                                   | 0.10                  | 0.19                  | 0.00   | 0.01   |
|                 | 2019 | 1.39                                                      | 1.37                  | 1.40                  | -0.11  | 0.17   | 0.35                                                   | 0.29                  | 0.47                  | -0.01  | 0.01   | 0.14                                                   | 0.12                  | 0.16                  | 0.00   | 0.01   |
|                 | 2020 | 1.09                                                      | 1.02                  | 1.37                  | -0.13  | 0.15   | 0.29                                                   | 0.24                  | 0.34                  | -0.01  | 0.03   | 0.12                                                   | 0.10                  | 0.19                  | 0.00   | 0.05   |
| NE US (MANE-VU) | 2011 | 1.32                                                      | 1.30                  | 1.34                  | 0.00   | 0.01   | 0.30                                                   | 0.26                  | 0.32                  | 0.00   | 0.01   | 0.85                                                   | 0.64                  | 0.95                  | -0.01  | 0.02   |
|                 | 2012 | 1.34                                                      | 1.33                  | 1.36                  | 0.00   | 0.01   | 0.34                                                   | 0.21                  | 0.39                  | 0.00   | 0.01   | 0.46                                                   | 0.34                  | 0.70                  | -0.02  | 0.03   |
|                 | 2013 | 1.35                                                      | 1.34                  | 1.36                  | 0.00   | 0.03   | 0.29                                                   | 0.24                  | 0.42                  | 0.00   | 0.01   | 0.49                                                   | 0.40                  | 0.57                  | -0.02  | 0.03   |
|                 | 2014 | 1.35                                                      | 1.34                  | 1.37                  | -0.01  | 0.03   | 0.38                                                   | 0.32                  | 0.40                  | -0.01  | 0.01   | 0.27                                                   | 0.25                  | 0.43                  | -0.01  | 0.03   |
|                 | 2015 | 1.35                                                      | 1.35                  | 1.37                  | 0.00   | 0.05   | 0.30                                                   | 0.16                  | 0.35                  | 0.00   | 0.01   | 0.31                                                   | 0.19                  | 0.39                  | -0.02  | 0.03   |
|                 | 2016 | 1.36                                                      | 1.34                  | 1.38                  | -0.02  | 0.10   | 0.25                                                   | 0.18                  | 0.31                  | 0.00   | 0.01   | 0.19                                                   | 0.17                  | 0.26                  | 0.00   | 0.03   |
|                 | 2017 | 1.36                                                      | 1.34                  | 1.38                  | -0.03  | 0.09   | 0.33                                                   | 0.22                  | 0.49                  | -0.01  | 0.01   | 0.18                                                   | 0.16                  | 0.24                  | 0.00   | 0.02   |
|                 | 2018 | 1.30                                                      | 1.18                  | 1.36                  | -0.06  | 0.14   | 0.34                                                   | 0.18                  | 0.40                  | -0.01  | 0.02   | 0.18                                                   | 0.13                  | 0.27                  | -0.01  | 0.04   |
|                 | 2019 | 1.34                                                      | 1.27                  | 1.36                  | -0.08  | 0.14   | 0.23                                                   | 0.15                  | 0.31                  | -0.01  | 0.01   | 0.14                                                   | 0.11                  | 0.19                  | -0.01  | 0.03   |
|                 | 2020 | 1.26                                                      | 1.12                  | 1.33                  | -0.10  | 0.14   | 0.18                                                   | 0.16                  | 0.31                  | -0.01  | 0.02   | 0.12                                                   | 0.09                  | 0.15                  | -0.01  | 0.04   |
| SE US (SESARM)  | 2011 | 1.34                                                      | 1.07                  | 1.35                  | 0.00   | 0.07   | 0.30                                                   | 0.20                  | 0.54                  | 0.00   | 0.03   | 0.48                                                   | 0.19                  | 0.64                  | -0.02  | 0.05   |
|                 | 2012 | 1.35                                                      | 1.25                  | 1.36                  | 0.00   | 0.07   | 0.32                                                   | 0.19                  | 0.41                  | 0.00   | 0.01   | 0.30                                                   | 0.19                  | 0.52                  | -0.01  | 0.04   |
|                 | 2013 | 1.34                                                      | 1.21                  | 1.36                  | -0.02  | 0.05   | 0.40                                                   | 0.21                  | 0.54                  | -0.01  | 0.02   | 0.30                                                   | 0.16                  | 0.40                  | -0.02  | 0.05   |
|                 | 2014 | 1.35                                                      | 1.27                  | 1.36                  | -0.02  | 0.05   | 0.38                                                   | 0.24                  | 0.50                  | -0.01  | 0.01   | 0.32                                                   | 0.10                  | 0.46                  | -0.02  | 0.05   |
|                 | 2015 | 1.32                                                      | 1.09                  | 1.36                  | -0.04  | 0.09   | 0.31                                                   | 0.15                  | 0.51                  | -0.01  | 0.01   | 0.19                                                   | 0.10                  | 0.35                  | -0.02  | 0.11   |
|                 | 2016 | 1.32                                                      | 1.21                  | 1.35                  | -0.08  | 0.12   | 0.25                                                   | 0.17                  | 0.39                  | -0.01  | 0.01   | 0.13                                                   | 0.07                  | 0.20                  | -0.01  | 0.07   |
|                 | 2017 | 1.35                                                      | 1.27                  | 1.37                  | -0.05  | 0.13   | 0.25                                                   | 0.19                  | 0.38                  | 0.00   | 0.01   | 0.12                                                   | 0.06                  | 0.18                  | -0.01  | 0.05   |
|                 | 2018 | 1.34                                                      | 1.19                  | 1.35                  | -0.08  | 0.16   | 0.29                                                   | 0.19                  | 0.42                  | -0.01  | 0.01   | 0.13                                                   | 0.07                  | 0.21                  | -0.01  | 0.08   |
|                 | 2019 | 1.33                                                      | 1.22                  | 1.35                  | -0.08  | 0.14   | 0.24                                                   | 0.18                  | 0.41                  | -0.01  | 0.01   | 0.14                                                   | 0.07                  | 0.18                  | -0.01  | 0.09   |
|                 | 2020 | 1.19                                                      | 0.91                  | 1.32                  | -0.08  | 0.12   | 0.27                                                   | 0.13                  | 0.43                  | -0.01  | 0.02   | 0.13                                                   | 0.09                  | 0.16                  | -0.02  | 0.08   |

**Supplementary Table 18. Simulated winter  $\Delta c_{\text{SIA}}/\Delta c_{\text{SO}_4^{2-}}$ ,  $\Delta c_{\text{SIA}}/\Delta c_{\text{NO}_3^-}$ , and  $\Delta c_{\text{SIA}}/\Delta c_{\text{NH}_4^+}$  with 10% reductions.** “W US”, “C US”, “MW US”, “NE US”, “SE US” stand for the Western, Central, Midwestern, Northeastern, Southeastern US, respectively. The 25<sup>th</sup> and 75<sup>th</sup> percentiles (perc) of values from the sites within the corresponding region show their regional variability. Uncertainty lower and upper bounds (Unc LB and Unc UB) are the mean uncertainties (95% CI defined as the 2.5<sup>th</sup> and the 97.5<sup>th</sup> percentiles) of the sites within the region. Uncertainties of each site are estimated using 500 Monte Carlo simulations based on the precisions and detection limits shown in Supplementary Table 7.

| Region          | Year | $\Delta c_{\text{SIA}}/\Delta c_{\text{SO}_4^{2-}}$ (10%) |                       |                       |        |        | $\Delta c_{\text{SIA}}/\Delta c_{\text{NO}_3^-}$ (10%) |                       |                       |        |        | $\Delta c_{\text{SIA}}/\Delta c_{\text{NH}_4^+}$ (10%) |                       |                       |        |        |
|-----------------|------|-----------------------------------------------------------|-----------------------|-----------------------|--------|--------|--------------------------------------------------------|-----------------------|-----------------------|--------|--------|--------------------------------------------------------|-----------------------|-----------------------|--------|--------|
|                 |      | Median                                                    | 25 <sup>th</sup> perc | 75 <sup>th</sup> perc | Unc LB | Unc UB | Median                                                 | 25 <sup>th</sup> perc | 75 <sup>th</sup> perc | Unc LB | Unc UB | Median                                                 | 25 <sup>th</sup> perc | 75 <sup>th</sup> perc | Unc LB | Unc UB |
| W US (WRAP)     | 2011 | 1.35                                                      | 0.40                  | 0.53                  | -0.03  | 0.08   | 0.54                                                   | 0.50                  | 0.66                  | -0.02  | 0.05   | 0.45                                                   | 0.40                  | 0.53                  | -0.03  | 0.08   |
|                 | 2012 | 1.43                                                      | 0.22                  | 0.39                  | -0.02  | 0.06   | 0.44                                                   | 0.36                  | 0.88                  | -0.03  | 0.06   | 0.36                                                   | 0.22                  | 0.39                  | -0.02  | 0.06   |
|                 | 2013 | 1.38                                                      | 0.15                  | 0.32                  | -0.03  | 0.04   | 0.80                                                   | 0.54                  | 0.98                  | -0.02  | 0.04   | 0.24                                                   | 0.15                  | 0.32                  | -0.03  | 0.04   |
|                 | 2014 | 1.38                                                      | 0.11                  | 0.36                  | -0.01  | 0.09   | 0.68                                                   | 0.37                  | 0.87                  | -0.03  | 0.07   | 0.20                                                   | 0.11                  | 0.36                  | -0.01  | 0.09   |
|                 | 2015 | 1.39                                                      | 0.12                  | 0.33                  | -0.01  | 0.06   | 0.79                                                   | 0.38                  | 0.84                  | -0.01  | 0.05   | 0.24                                                   | 0.12                  | 0.33                  | -0.01  | 0.06   |
|                 | 2016 | 1.35                                                      | 0.16                  | 0.40                  | -0.01  | 0.09   | 0.76                                                   | 0.62                  | 0.89                  | -0.04  | 0.06   | 0.34                                                   | 0.16                  | 0.40                  | -0.01  | 0.09   |
|                 | 2017 | 1.36                                                      | 0.13                  | 0.36                  | -0.02  | 0.06   | 0.76                                                   | 0.49                  | 0.85                  | -0.04  | 0.10   | 0.27                                                   | 0.13                  | 0.36                  | -0.02  | 0.06   |
|                 | 2018 | 1.35                                                      | 0.15                  | 0.32                  | -0.02  | 0.06   | 0.68                                                   | 0.42                  | 0.80                  | -0.05  | 0.09   | 0.29                                                   | 0.15                  | 0.32                  | -0.02  | 0.06   |
|                 | 2019 | 1.37                                                      | 0.17                  | 0.51                  | -0.03  | 0.12   | 0.80                                                   | 0.65                  | 0.98                  | -0.05  | 0.09   | 0.24                                                   | 0.17                  | 0.51                  | -0.03  | 0.12   |
|                 | 2020 | 1.37                                                      | 0.19                  | 0.34                  | -0.04  | 0.11   | 0.83                                                   | 0.48                  | 0.93                  | -0.07  | 0.09   | 0.21                                                   | 0.19                  | 0.34                  | -0.04  | 0.11   |
| C US (CENSARA)  | 2011 | 1.22                                                      | 0.57                  | 0.83                  | -0.04  | 0.09   | 0.88                                                   | 0.78                  | 0.98                  | -0.01  | 0.03   | 0.70                                                   | 0.57                  | 0.83                  | -0.04  | 0.09   |
|                 | 2012 | 1.36                                                      | 0.31                  | 0.62                  | -0.01  | 0.03   | 0.96                                                   | 0.77                  | 1.02                  | -0.01  | 0.01   | 0.37                                                   | 0.31                  | 0.62                  | -0.01  | 0.03   |
|                 | 2013 | 1.34                                                      | 0.24                  | 0.53                  | -0.01  | 0.06   | 1.05                                                   | 0.99                  | 1.12                  | 0.00   | 0.01   | 0.34                                                   | 0.24                  | 0.53                  | -0.01  | 0.06   |
|                 | 2014 | 1.34                                                      | 0.14                  | 0.36                  | -0.01  | 0.03   | 1.13                                                   | 1.02                  | 1.20                  | 0.00   | 0.01   | 0.23                                                   | 0.14                  | 0.36                  | -0.01  | 0.03   |
|                 | 2015 | 1.36                                                      | 0.14                  | 0.51                  | -0.01  | 0.06   | 1.06                                                   | 0.91                  | 1.16                  | 0.00   | 0.02   | 0.23                                                   | 0.14                  | 0.51                  | -0.01  | 0.06   |
|                 | 2016 | 1.35                                                      | 0.13                  | 0.60                  | -0.01  | 0.08   | 1.07                                                   | 0.82                  | 1.18                  | 0.00   | 0.03   | 0.25                                                   | 0.13                  | 0.60                  | -0.01  | 0.08   |
|                 | 2017 | 1.38                                                      | 0.11                  | 0.39                  | -0.01  | 0.05   | 0.98                                                   | 0.77                  | 1.17                  | -0.01  | 0.02   | 0.25                                                   | 0.11                  | 0.39                  | -0.01  | 0.05   |
|                 | 2018 | 1.36                                                      | 0.10                  | 0.62                  | 0.00   | 0.08   | 1.13                                                   | 0.89                  | 1.21                  | 0.00   | 0.03   | 0.22                                                   | 0.10                  | 0.62                  | 0.00   | 0.08   |
|                 | 2019 | 1.34                                                      | 0.07                  | 0.63                  | -0.01  | 0.15   | 1.11                                                   | 0.82                  | 1.23                  | 0.00   | 0.05   | 0.26                                                   | 0.07                  | 0.63                  | -0.01  | 0.15   |
|                 | 2020 | 1.38                                                      | 0.07                  | 0.66                  | -0.01  | 0.15   | 1.06                                                   | 0.73                  | 1.22                  | -0.01  | 0.05   | 0.23                                                   | 0.07                  | 0.66                  | -0.01  | 0.15   |
| MW US (LADCO)   | 2011 | 0.77                                                      | 1.59                  | 2.46                  | -0.06  | 0.13   | 0.66                                                   | 0.49                  | 0.91                  | -0.02  | 0.06   | 2.13                                                   | 1.59                  | 2.46                  | -0.06  | 0.13   |
|                 | 2012 | 1.29                                                      | 0.31                  | 0.84                  | -0.02  | 0.07   | 1.11                                                   | 1.07                  | 1.18                  | 0.00   | 0.01   | 0.44                                                   | 0.31                  | 0.84                  | -0.02  | 0.07   |
|                 | 2013 | 1.30                                                      | 0.15                  | 0.74                  | -0.02  | 0.07   | 1.19                                                   | 1.14                  | 1.24                  | 0.00   | 0.01   | 0.29                                                   | 0.15                  | 0.74                  | -0.02  | 0.07   |
|                 | 2014 | 1.30                                                      | 0.11                  | 1.83                  | -0.03  | 0.17   | 1.20                                                   | 0.91                  | 1.25                  | 0.00   | 0.08   | 0.48                                                   | 0.11                  | 1.83                  | -0.03  | 0.17   |
|                 | 2015 | 1.20                                                      | 0.29                  | 1.93                  | -0.01  | 0.22   | 1.11                                                   | 0.83                  | 1.19                  | 0.00   | 0.05   | 0.85                                                   | 0.29                  | 1.93                  | -0.01  | 0.22   |
|                 | 2016 | 1.22                                                      | 0.25                  | 1.34                  | -0.03  | 0.17   | 1.10                                                   | 0.95                  | 1.19                  | 0.00   | 0.04   | 0.73                                                   | 0.25                  | 1.34                  | -0.03  | 0.17   |
|                 | 2017 | 1.30                                                      | 0.23                  | 0.68                  | -0.01  | 0.08   | 1.14                                                   | 1.11                  | 1.18                  | -0.01  | 0.02   | 0.35                                                   | 0.23                  | 0.68                  | -0.01  | 0.08   |
|                 | 2018 | 1.30                                                      | 0.17                  | 0.96                  | -0.01  | 0.16   | 1.20                                                   | 1.12                  | 1.23                  | 0.00   | 0.02   | 0.35                                                   | 0.17                  | 0.96                  | -0.01  | 0.16   |
|                 | 2019 | 1.28                                                      | 0.15                  | 1.01                  | -0.03  | 0.25   | 1.19                                                   | 1.07                  | 1.23                  | -0.01  | 0.05   | 0.44                                                   | 0.15                  | 1.01                  | -0.03  | 0.25   |
|                 | 2020 | 1.28                                                      | 0.22                  | 1.06                  | -0.03  | 0.21   | 1.16                                                   | 1.06                  | 1.20                  | -0.01  | 0.05   | 0.46                                                   | 0.22                  | 1.06                  | -0.03  | 0.21   |
| NE US (MANE-VU) | 2011 | 0.57                                                      | 2.34                  | 3.25                  | -0.10  | 0.20   | 0.38                                                   | 0.26                  | 0.60                  | -0.03  | 0.04   | 2.64                                                   | 2.34                  | 3.25                  | -0.10  | 0.20   |
|                 | 2012 | 0.84                                                      | 1.38                  | 2.59                  | -0.08  | 0.13   | 0.72                                                   | 0.53                  | 0.77                  | -0.03  | 0.04   | 1.91                                                   | 1.38                  | 2.59                  | -0.08  | 0.13   |
|                 | 2013 | 1.10                                                      | 0.97                  | 2.41                  | -0.13  | 0.20   | 0.86                                                   | 0.70                  | 1.04                  | -0.03  | 0.06   | 1.30                                                   | 0.97                  | 2.41                  | -0.13  | 0.20   |
|                 | 2014 | 0.85                                                      | 1.70                  | 2.41                  | -0.18  | 0.28   | 0.78                                                   | 0.64                  | 0.83                  | -0.06  | 0.09   | 2.12                                                   | 1.70                  | 2.41                  | -0.18  | 0.28   |
|                 | 2015 | 0.78                                                      | 1.47                  | 2.74                  | -0.08  | 0.24   | 0.67                                                   | 0.46                  | 0.82                  | -0.03  | 0.08   | 2.25                                                   | 1.47                  | 2.74                  | -0.08  | 0.24   |
|                 | 2016 | 0.99                                                      | 1.20                  | 2.12                  | -0.15  | 0.22   | 0.75                                                   | 0.65                  | 0.89                  | -0.05  | 0.07   | 1.63                                                   | 1.20                  | 2.12                  | -0.15  | 0.22   |
|                 | 2017 | 1.15                                                      | 0.71                  | 1.54                  | -0.10  | 0.18   | 0.94                                                   | 0.86                  | 1.01                  | -0.03  | 0.05   | 1.08                                                   | 0.71                  | 1.54                  | -0.10  | 0.18   |
|                 | 2018 | 1.04                                                      | 0.64                  | 2.53                  | -0.08  | 0.34   | 0.91                                                   | 0.83                  | 1.08                  | -0.02  | 0.09   | 1.67                                                   | 0.64                  | 2.53                  | -0.08  | 0.34   |
|                 | 2019 | 1.17                                                      | 0.51                  | 1.96                  | -0.11  | 0.35   | 0.96                                                   | 0.84                  | 1.10                  | -0.04  | 0.10   | 0.95                                                   | 0.51                  | 1.96                  | -0.11  | 0.35   |
|                 | 2020 | 1.03                                                      | 0.81                  | 2.07                  | -0.19  | 0.34   | 0.84                                                   | 0.70                  | 0.91                  | -0.05  | 0.10   | 1.50                                                   | 0.81                  | 2.07                  | -0.19  | 0.34   |
| SE US (SESARM)  | 2011 | 1.14                                                      | 0.26                  | 1.40                  | -0.08  | 0.11   | 0.60                                                   | 0.51                  | 0.68                  | -0.03  | 0.15   | 0.89                                                   | 0.26                  | 1.40                  | -0.08  | 0.11   |
|                 | 2012 | 1.13                                                      | 0.42                  | 1.19                  | -0.05  | 0.10   | 0.74                                                   | 0.53                  | 0.79                  | -0.02  | 0.04   | 0.76                                                   | 0.42                  | 1.19                  | -0.05  | 0.10   |
|                 | 2013 | 1.09                                                      | 0.33                  | 1.55                  | -0.04  | 0.10   | 0.81                                                   | 0.69                  | 0.86                  | -0.02  | 0.04   | 0.73                                                   | 0.33                  | 1.55                  | -0.04  | 0.10   |
|                 | 2014 | 1.10                                                      | 0.34                  | 1.64                  | -0.04  | 0.11   | 0.83                                                   | 0.68                  | 0.88                  | -0.02  | 0.05   | 0.67                                                   | 0.34                  | 1.64                  | -0.04  | 0.11   |
|                 | 2015 | 1.07                                                      | 0.50                  | 1.63                  | -0.05  | 0.15   | 0.71                                                   | 0.59                  | 0.88                  | -0.03  | 0.04   | 0.88                                                   | 0.50                  | 1.63                  | -0.05  | 0.15   |
|                 | 2016 | 1.15                                                      | 0.43                  | 1.24                  | -0.05  | 0.12   | 0.68                                                   | 0.61                  | 0.87                  | -0.03  | 0.05   | 0.82                                                   | 0.43                  | 1.24                  | -0.05  | 0.12   |
|                 | 2017 | 1.24                                                      | 0.31                  | 0.87                  | -0.03  | 0.08   | 0.74                                                   | 0.61                  | 0.84                  | -0.01  | 0.04   | 0.62                                                   | 0.31                  | 0.87                  | -0.03  | 0.08   |
|                 | 2018 | 1.10                                                      | 0.42                  | 1.39                  | -0.07  | 0.18   | 0.78                                                   | 0.68                  | 0.92                  | -0.03  | 0.06   | 0.73                                                   | 0.42                  | 1.39                  | -0.07  | 0.18   |
|                 | 2019 | 1.21                                                      | 0.38                  | 0.86                  | -0.07  | 0.20   | 0.70                                                   | 0.64                  | 0.88                  | -0.04  | 0.07   | 0.70                                                   | 0.38                  | 0.86                  | -0.07  | 0.20   |
|                 | 2020 | 1.16                                                      | 0.45                  | 1.25                  | -0.08  | 0.19   | 0.66                                                   | 0.57                  | 0.77                  | -0.05  | 0.09   | 0.84                                                   | 0.45                  | 1.25                  | -0.08  | 0.19   |



**Supplementary Table 19. Simulated winter  $\Delta c_{\text{SIA}}/\Delta c_{\text{SO}_2^-}$ ,  $\Delta c_{\text{SIA}}/\Delta c_{\text{NO}_3^-}$ , and  $\Delta c_{\text{SIA}}/\Delta c_{\text{NH}_4^+}$  with 40% reductions.** “W US”, “C US”, “MW US”, “NE US”, “SE US” stand for the Western, Central, Midwestern, Northeastern, Southeastern US, respectively. The 25<sup>th</sup> and 75<sup>th</sup> percentiles (perc) of values from the sites within the corresponding region show their regional variability. Uncertainty lower and upper bounds (Unc LB and Unc UB) are the mean uncertainties (95% CI defined as the 2.5<sup>th</sup> and the 97.5<sup>th</sup> percentiles) of the sites within the region. Uncertainties of each site are estimated using 500 Monte Carlo simulations based on the precisions and detection limits shown in Supplementary Table 7.

| Region          | Year | $\Delta c_{\text{SIA}}/\Delta c_{\text{SO}_2^-}$ (40%) |                       |                       |        |        | $\Delta c_{\text{SIA}}/\Delta c_{\text{NO}_3^-}$ (40%) |                       |                       |        |        | $\Delta c_{\text{SIA}}/\Delta c_{\text{NH}_4^+}$ (40%) |                       |                       |        |        |
|-----------------|------|--------------------------------------------------------|-----------------------|-----------------------|--------|--------|--------------------------------------------------------|-----------------------|-----------------------|--------|--------|--------------------------------------------------------|-----------------------|-----------------------|--------|--------|
|                 |      | Median                                                 | 25 <sup>th</sup> perc | 75 <sup>th</sup> perc | Unc LB | Unc UB | Median                                                 | 25 <sup>th</sup> perc | 75 <sup>th</sup> perc | Unc LB | Unc UB | Median                                                 | 25 <sup>th</sup> perc | 75 <sup>th</sup> perc | Unc LB | Unc UB |
| W US (WRAP)     | 2011 | 1.19                                                   | 1.13                  | 1.36                  | -0.08  | 0.46   | 0.54                                                   | 0.50                  | 0.67                  | -0.02  | 0.03   | 0.64                                                   | 0.53                  | 0.75                  | -0.03  | 0.08   |
|                 | 2012 | 1.36                                                   | 1.24                  | 1.45                  | -0.08  | 0.36   | 0.43                                                   | 0.36                  | 0.89                  | -0.01  | 0.03   | 0.51                                                   | 0.26                  | 0.53                  | -0.01  | 0.04   |
|                 | 2013 | 1.35                                                   | 1.37                  | 1.45                  | -0.01  | 0.19   | 0.81                                                   | 0.52                  | 0.97                  | -0.01  | 0.02   | 0.35                                                   | 0.22                  | 0.38                  | -0.02  | 0.04   |
|                 | 2014 | 1.22                                                   | 1.13                  | 1.42                  | -0.03  | 0.62   | 0.69                                                   | 0.36                  | 0.87                  | -0.02  | 0.05   | 0.28                                                   | 0.14                  | 0.51                  | -0.02  | 0.05   |
|                 | 2015 | 1.35                                                   | 1.34                  | 1.42                  | -0.03  | 0.18   | 0.78                                                   | 0.36                  | 0.83                  | -0.01  | 0.04   | 0.31                                                   | 0.23                  | 0.45                  | -0.01  | 0.04   |
|                 | 2016 | 1.27                                                   | 1.26                  | 1.37                  | -0.06  | 0.40   | 0.76                                                   | 0.62                  | 0.90                  | -0.03  | 0.05   | 0.47                                                   | 0.27                  | 0.60                  | -0.02  | 0.11   |
|                 | 2017 | 1.09                                                   | 0.85                  | 1.42                  | -0.14  | 0.62   | 0.74                                                   | 0.49                  | 0.85                  | -0.03  | 0.08   | 0.38                                                   | 0.29                  | 0.48                  | -0.03  | 0.06   |
|                 | 2018 | 0.78                                                   | 0.13                  | 1.37                  | -0.12  | 0.61   | 0.68                                                   | 0.42                  | 0.78                  | -0.04  | 0.08   | 0.38                                                   | 0.19                  | 0.45                  | -0.01  | 0.06   |
|                 | 2019 | 1.35                                                   | 1.25                  | 1.36                  | -0.05  | 0.37   | 0.79                                                   | 0.64                  | 0.98                  | -0.04  | 0.08   | 0.44                                                   | 0.26                  | 0.66                  | -0.03  | 0.13   |
|                 | 2020 | 0.78                                                   | 1.22                  | 1.37                  | -0.06  | 0.60   | 0.81                                                   | 0.48                  | 0.90                  | -0.06  | 0.09   | 0.32                                                   | 0.24                  | 0.47                  | -0.04  | 0.14   |
| C US (CENSARA)  | 2011 | 1.33                                                   | 1.24                  | 1.28                  | -0.01  | 0.01   | 0.90                                                   | 0.81                  | 1.00                  | -0.01  | 0.02   | 1.43                                                   | 1.37                  | 1.49                  | -0.06  | 0.09   |
|                 | 2012 | 1.36                                                   | 1.31                  | 1.39                  | -0.02  | 0.07   | 0.96                                                   | 0.79                  | 1.02                  | 0.00   | 0.01   | 0.74                                                   | 0.59                  | 1.00                  | -0.02  | 0.03   |
|                 | 2013 | 1.35                                                   | 1.31                  | 1.36                  | -0.01  | 0.02   | 1.06                                                   | 1.01                  | 1.13                  | 0.00   | 0.01   | 0.78                                                   | 0.52                  | 1.24                  | -0.02  | 0.07   |
|                 | 2014 | 1.36                                                   | 1.33                  | 1.35                  | -0.01  | 0.03   | 1.13                                                   | 1.03                  | 1.20                  | 0.00   | 0.01   | 0.54                                                   | 0.36                  | 0.82                  | -0.02  | 0.04   |
|                 | 2015 | 1.33                                                   | 1.31                  | 1.37                  | -0.01  | 0.05   | 1.06                                                   | 0.93                  | 1.16                  | 0.00   | 0.01   | 0.41                                                   | 0.26                  | 1.04                  | -0.01  | 0.07   |
|                 | 2016 | 1.34                                                   | 1.29                  | 1.36                  | -0.04  | 0.05   | 1.07                                                   | 0.84                  | 1.18                  | 0.00   | 0.02   | 0.50                                                   | 0.31                  | 1.07                  | -0.03  | 0.07   |
|                 | 2017 | 1.36                                                   | 1.31                  | 1.41                  | -0.02  | 0.11   | 0.97                                                   | 0.77                  | 1.16                  | -0.01  | 0.02   | 0.41                                                   | 0.19                  | 0.68                  | -0.01  | 0.06   |
|                 | 2018 | 1.31                                                   | 1.28                  | 1.37                  | -0.01  | 0.02   | 1.13                                                   | 0.91                  | 1.21                  | 0.00   | 0.02   | 0.37                                                   | 0.23                  | 1.15                  | -0.03  | 0.10   |
|                 | 2019 | 1.34                                                   | 1.28                  | 1.37                  | -0.02  | 0.04   | 1.11                                                   | 0.84                  | 1.23                  | 0.00   | 0.04   | 0.53                                                   | 0.15                  | 1.17                  | -0.02  | 0.14   |
|                 | 2020 | 1.29                                                   | 1.26                  | 1.37                  | -0.06  | 0.10   | 1.06                                                   | 0.75                  | 1.22                  | -0.01  | 0.05   | 0.38                                                   | 0.12                  | 0.88                  | -0.01  | 0.11   |
| MW US (LADCO)   | 2011 | 1.36                                                   | 0.79                  | 1.13                  | -0.03  | 0.06   | 0.88                                                   | 0.76                  | 1.03                  | -0.03  | 0.05   | 2.72                                                   | 1.91                  | 3.23                  | -0.04  | 0.11   |
|                 | 2012 | 1.39                                                   | 1.25                  | 1.32                  | -0.01  | 0.01   | 1.14                                                   | 1.10                  | 1.20                  | 0.00   | 0.01   | 1.46                                                   | 1.13                  | 1.89                  | -0.05  | 0.08   |
|                 | 2013 | 1.38                                                   | 1.27                  | 1.33                  | 0.00   | 0.01   | 1.20                                                   | 1.18                  | 1.25                  | 0.00   | 0.00   | 1.33                                                   | 1.29                  | 2.23                  | -0.06  | 0.09   |
|                 | 2014 | 1.38                                                   | 1.15                  | 1.33                  | 0.00   | 0.04   | 1.21                                                   | 1.11                  | 1.25                  | 0.00   | 0.03   | 1.81                                                   | 1.34                  | 3.01                  | -0.09  | 0.11   |
|                 | 2015 | 1.39                                                   | 1.10                  | 1.32                  | 0.00   | 0.05   | 1.17                                                   | 0.99                  | 1.20                  | 0.00   | 0.02   | 2.07                                                   | 1.25                  | 3.20                  | -0.10  | 0.17   |
|                 | 2016 | 1.40                                                   | 1.17                  | 1.32                  | -0.01  | 0.04   | 1.15                                                   | 1.05                  | 1.20                  | 0.00   | 0.02   | 2.15                                                   | 1.33                  | 2.60                  | -0.08  | 0.12   |
|                 | 2017 | 1.40                                                   | 1.26                  | 1.35                  | -0.03  | 0.08   | 1.15                                                   | 1.12                  | 1.20                  | 0.00   | 0.01   | 1.20                                                   | 0.63                  | 1.73                  | -0.05  | 0.10   |
|                 | 2018 | 1.39                                                   | 1.23                  | 1.33                  | 0.00   | 0.02   | 1.22                                                   | 1.16                  | 1.24                  | 0.00   | 0.01   | 1.65                                                   | 0.65                  | 2.69                  | -0.06  | 0.17   |
|                 | 2019 | 1.40                                                   | 1.22                  | 1.33                  | -0.01  | 0.05   | 1.20                                                   | 1.13                  | 1.23                  | 0.00   | 0.03   | 1.54                                                   | 0.55                  | 2.47                  | -0.09  | 0.22   |
|                 | 2020 | 1.39                                                   | 1.20                  | 1.33                  | -0.02  | 0.05   | 1.17                                                   | 1.10                  | 1.21                  | 0.00   | 0.03   | 1.46                                                   | 0.68                  | 2.33                  | -0.11  | 0.21   |
| NE US (MANE-VU) | 2011 | 1.30                                                   | 0.46                  | 0.87                  | -0.04  | 0.06   | 0.46                                                   | 0.39                  | 0.77                  | -0.03  | 0.05   | 3.09                                                   | 2.70                  | 3.25                  | -0.08  | 0.17   |
|                 | 2012 | 1.34                                                   | 0.88                  | 1.09                  | -0.02  | 0.04   | 0.80                                                   | 0.70                  | 0.85                  | -0.02  | 0.03   | 2.45                                                   | 2.22                  | 3.14                  | -0.06  | 0.07   |
|                 | 2013 | 1.34                                                   | 0.97                  | 1.24                  | -0.02  | 0.05   | 0.97                                                   | 0.85                  | 1.10                  | -0.02  | 0.04   | 2.34                                                   | 2.06                  | 3.24                  | -0.09  | 0.16   |
|                 | 2014 | 1.35                                                   | 0.96                  | 1.13                  | -0.05  | 0.07   | 0.95                                                   | 0.79                  | 0.99                  | -0.05  | 0.06   | 3.04                                                   | 2.78                  | 3.19                  | -0.12  | 0.17   |
|                 | 2015 | 1.35                                                   | 0.80                  | 1.16                  | -0.05  | 0.08   | 0.84                                                   | 0.70                  | 0.99                  | -0.04  | 0.07   | 2.80                                                   | 2.43                  | 3.22                  | -0.10  | 0.17   |
|                 | 2016 | 1.36                                                   | 0.98                  | 1.16                  | -0.05  | 0.07   | 0.89                                                   | 0.78                  | 0.97                  | -0.03  | 0.06   | 2.50                                                   | 2.18                  | 2.99                  | -0.09  | 0.14   |
|                 | 2017 | 1.37                                                   | 1.13                  | 1.25                  | -0.02  | 0.04   | 0.99                                                   | 0.91                  | 1.03                  | -0.02  | 0.03   | 2.06                                                   | 1.68                  | 2.67                  | -0.10  | 0.15   |
|                 | 2018 | 1.35                                                   | 1.02                  | 1.26                  | -0.03  | 0.08   | 1.06                                                   | 0.95                  | 1.13                  | -0.02  | 0.07   | 2.75                                                   | 1.44                  | 3.29                  | -0.16  | 0.22   |
|                 | 2019 | 1.36                                                   | 1.08                  | 1.29                  | -0.05  | 0.10   | 1.02                                                   | 0.96                  | 1.13                  | -0.03  | 0.09   | 1.98                                                   | 1.21                  | 2.82                  | -0.17  | 0.32   |
|                 | 2020 | 1.34                                                   | 0.98                  | 1.24                  | -0.07  | 0.10   | 0.87                                                   | 0.85                  | 0.99                  | -0.04  | 0.09   | 2.39                                                   | 1.35                  | 2.74                  | -0.19  | 0.28   |
| SE US (SESARM)  | 2011 | 1.32                                                   | 0.50                  | 1.17                  | -0.03  | 0.18   | 0.63                                                   | 0.57                  | 0.69                  | -0.03  | 0.14   | 1.22                                                   | 0.39                  | 1.74                  | -0.08  | 0.12   |
|                 | 2012 | 1.34                                                   | 0.98                  | 1.24                  | -0.01  | 0.06   | 0.77                                                   | 0.58                  | 0.80                  | -0.01  | 0.03   | 1.14                                                   | 0.68                  | 1.47                  | -0.04  | 0.11   |
|                 | 2013 | 1.34                                                   | 1.11                  | 1.27                  | -0.01  | 0.03   | 0.83                                                   | 0.76                  | 0.90                  | -0.01  | 0.03   | 1.33                                                   | 0.57                  | 2.02                  | -0.06  | 0.07   |
|                 | 2014 | 1.34                                                   | 1.04                  | 1.26                  | -0.02  | 0.05   | 0.86                                                   | 0.76                  | 0.95                  | -0.02  | 0.04   | 1.15                                                   | 0.62                  | 2.23                  | -0.06  | 0.08   |
|                 | 2015 | 1.34                                                   | 1.05                  | 1.24                  | -0.03  | 0.05   | 0.80                                                   | 0.68                  | 0.89                  | -0.02  | 0.04   | 1.67                                                   | 0.82                  | 2.24                  | -0.05  | 0.10   |
|                 | 2016 | 1.35                                                   | 1.02                  | 1.27                  | -0.03  | 0.07   | 0.70                                                   | 0.66                  | 0.90                  | -0.02  | 0.04   | 1.30                                                   | 0.79                  | 1.90                  | -0.05  | 0.09   |
|                 | 2017 | 1.36                                                   | 1.18                  | 1.30                  | -0.03  | 0.08   | 0.77                                                   | 0.66                  | 0.90                  | -0.01  | 0.03   | 1.00                                                   | 0.43                  | 1.47                  | -0.04  | 0.07   |
|                 | 2018 | 1.35                                                   | 1.08                  | 1.28                  | -0.03  | 0.07   | 0.84                                                   | 0.74                  | 0.96                  | -0.02  | 0.05   | 1.36                                                   | 0.57                  | 2.15                  | -0.11  | 0.15   |
|                 | 2019 | 1.35                                                   | 1.15                  | 1.30                  | -0.05  | 0.11   | 0.71                                                   | 0.68                  | 0.89                  | -0.03  | 0.06   | 1.18                                                   | 0.52                  | 1.55                  | -0.08  | 0.19   |
|                 | 2020 | 1.33                                                   | 1.05                  | 1.23                  | -0.06  | 0.11   | 0.69                                                   | 0.58                  | 0.83                  | -0.04  | 0.08   | 1.36                                                   | 0.61                  | 1.78                  | -0.08  | 0.17   |

**Supplementary Table 20. Simulated winter  $\Delta c_{\text{SIA}}/\Delta c_{\text{SO}_2^-}$ ,  $\Delta c_{\text{SIA}}/\Delta c_{\text{NO}_3^-}$ , and  $\Delta c_{\text{SIA}}/\Delta c_{\text{NH}_4^+}$  with 70% reductions.** “W US”, “C US”, “MW US”, “NE US”, “SE US” stand for the Western, Central, Midwestern, Northeastern, Southeastern US, respectively. The 25<sup>th</sup> and 75<sup>th</sup> percentiles (perc) of values from the sites within the corresponding region show their regional variability. Uncertainty lower and upper bounds (Unc LB and Unc UB) are the mean uncertainties (95% CI defined as the 2.5<sup>th</sup> and the 97.5<sup>th</sup> percentiles) of the sites within the region. Uncertainties of each site are estimated using 500 Monte Carlo simulations based on the precisions and detection limits shown in Supplementary Table 7.

| Region          | Year | $\Delta c_{\text{SIA}}/\Delta c_{\text{SO}_2^-}$ (70%) |                       |                       |        |        | $\Delta c_{\text{SIA}}/\Delta c_{\text{NO}_3^-}$ (70%) |                       |                       |        |        | $\Delta c_{\text{SIA}}/\Delta c_{\text{NH}_4^+}$ (70%) |                       |                       |        |        |
|-----------------|------|--------------------------------------------------------|-----------------------|-----------------------|--------|--------|--------------------------------------------------------|-----------------------|-----------------------|--------|--------|--------------------------------------------------------|-----------------------|-----------------------|--------|--------|
|                 |      | Median                                                 | 25 <sup>th</sup> perc | 75 <sup>th</sup> perc | Unc LB | Unc UB | Median                                                 | 25 <sup>th</sup> perc | 75 <sup>th</sup> perc | Unc LB | Unc UB | Median                                                 | 25 <sup>th</sup> perc | 75 <sup>th</sup> perc | Unc LB | Unc UB |
| W US (WRAP)     | 2011 | 1.18                                                   | 0.92                  | 1.28                  | -0.26  | 0.47   | 0.54                                                   | 0.50                  | 0.67                  | -0.01  | 0.05   | 0.92                                                   | 0.66                  | 1.17                  | -0.04  | 0.08   |
|                 | 2012 | 1.11                                                   | 0.22                  | 1.17                  | -0.06  | 0.52   | 0.42                                                   | 0.35                  | 0.89                  | -0.01  | 0.03   | 0.54                                                   | 0.35                  | 0.86                  | -0.02  | 0.05   |
|                 | 2013 | 1.41                                                   | 1.06                  | 1.43                  | -0.01  | 0.51   | 0.79                                                   | 0.51                  | 0.96                  | -0.01  | 0.02   | 0.53                                                   | 0.38                  | 0.72                  | -0.02  | 0.04   |
|                 | 2014 | 0.79                                                   | 0.15                  | 1.41                  | -0.02  | 0.35   | 0.69                                                   | 0.34                  | 0.84                  | -0.02  | 0.04   | 0.48                                                   | 0.21                  | 0.66                  | -0.02  | 0.05   |
|                 | 2015 | 1.38                                                   | 1.17                  | 1.42                  | -0.03  | 0.27   | 0.77                                                   | 0.35                  | 0.81                  | -0.01  | 0.04   | 0.42                                                   | 0.35                  | 0.73                  | -0.01  | 0.05   |
|                 | 2016 | 1.15                                                   | 0.45                  | 1.29                  | -0.04  | 0.16   | 0.76                                                   | 0.61                  | 0.89                  | -0.02  | 0.05   | 0.79                                                   | 0.49                  | 0.91                  | -0.03  | 0.09   |
|                 | 2017 | 0.66                                                   | -0.43                 | 1.28                  | -0.08  | 0.34   | 0.73                                                   | 0.47                  | 0.84                  | -0.02  | 0.08   | 0.66                                                   | 0.45                  | 0.73                  | -0.04  | 0.06   |
|                 | 2018 | 0.69                                                   | -0.58                 | 1.19                  | -0.11  | 0.30   | 0.68                                                   | 0.42                  | 0.76                  | -0.04  | 0.08   | 0.51                                                   | 0.30                  | 0.67                  | -0.02  | 0.06   |
|                 | 2019 | 1.16                                                   | 0.31                  | 1.32                  | -0.07  | 0.21   | 0.78                                                   | 0.63                  | 0.98                  | -0.04  | 0.07   | 0.64                                                   | 0.47                  | 0.94                  | -0.03  | 0.14   |
|                 | 2020 | 0.80                                                   | 0.10                  | 1.17                  | -0.08  | 0.29   | 0.80                                                   | 0.47                  | 0.90                  | -0.05  | 0.09   | 0.48                                                   | 0.35                  | 0.73                  | -0.05  | 0.15   |
| C US (CENSARA)  | 2011 | 1.28                                                   | 1.26                  | 1.30                  | -0.01  | 0.01   | 0.92                                                   | 0.82                  | 1.01                  | -0.01  | 0.02   | 1.86                                                   | 1.71                  | 2.01                  | -0.03  | 0.04   |
|                 | 2012 | 1.26                                                   | 1.19                  | 1.26                  | -0.06  | 0.10   | 0.95                                                   | 0.80                  | 1.01                  | 0.00   | 0.01   | 1.31                                                   | 1.19                  | 1.36                  | -0.02  | 0.03   |
|                 | 2013 | 1.32                                                   | 1.31                  | 1.34                  | -0.02  | 0.04   | 1.05                                                   | 1.01                  | 1.12                  | 0.00   | 0.01   | 1.67                                                   | 1.39                  | 1.81                  | -0.03  | 0.03   |
|                 | 2014 | 1.30                                                   | 1.28                  | 1.32                  | -0.02  | 0.03   | 1.12                                                   | 1.03                  | 1.20                  | 0.00   | 0.00   | 1.38                                                   | 1.08                  | 1.54                  | -0.03  | 0.04   |
|                 | 2015 | 1.31                                                   | 1.29                  | 1.36                  | -0.03  | 0.05   | 1.05                                                   | 0.93                  | 1.16                  | 0.00   | 0.01   | 1.05                                                   | 0.96                  | 1.53                  | -0.03  | 0.04   |
|                 | 2016 | 1.27                                                   | 1.24                  | 1.28                  | -0.02  | 0.04   | 1.07                                                   | 0.85                  | 1.18                  | 0.00   | 0.01   | 1.22                                                   | 0.88                  | 1.51                  | -0.02  | 0.04   |
|                 | 2017 | 1.24                                                   | 1.16                  | 1.27                  | -0.03  | 0.08   | 0.96                                                   | 0.78                  | 1.15                  | 0.00   | 0.02   | 0.87                                                   | 0.54                  | 1.05                  | -0.02  | 0.06   |
|                 | 2018 | 1.37                                                   | 1.27                  | 1.38                  | -0.04  | 0.05   | 1.12                                                   | 0.91                  | 1.20                  | 0.00   | 0.02   | 1.09                                                   | 0.99                  | 1.62                  | -0.05  | 0.09   |
|                 | 2019 | 1.37                                                   | 1.30                  | 1.39                  | -0.03  | 0.04   | 1.11                                                   | 0.85                  | 1.22                  | 0.00   | 0.04   | 1.39                                                   | 0.38                  | 1.56                  | -0.02  | 0.08   |
|                 | 2020 | 1.17                                                   | 1.06                  | 1.26                  | -0.04  | 0.12   | 1.05                                                   | 0.76                  | 1.21                  | 0.00   | 0.04   | 0.97                                                   | 0.43                  | 1.10                  | -0.03  | 0.10   |
| MW US (LADCO)   | 2011 | 1.10                                                   | 0.99                  | 1.19                  | -0.03  | 0.05   | 1.00                                                   | 0.93                  | 1.08                  | -0.02  | 0.03   | 2.61                                                   | 1.94                  | 3.28                  | -0.06  | 0.08   |
|                 | 2012 | 1.32                                                   | 1.28                  | 1.33                  | -0.01  | 0.01   | 1.16                                                   | 1.11                  | 1.20                  | 0.00   | 0.01   | 2.32                                                   | 2.07                  | 2.60                  | -0.04  | 0.05   |
|                 | 2013 | 1.32                                                   | 1.29                  | 1.33                  | 0.00   | 0.01   | 1.21                                                   | 1.18                  | 1.25                  | 0.00   | 0.00   | 2.42                                                   | 2.30                  | 2.93                  | -0.04  | 0.06   |
|                 | 2014 | 1.32                                                   | 1.22                  | 1.34                  | 0.00   | 0.03   | 1.22                                                   | 1.16                  | 1.26                  | 0.00   | 0.01   | 2.71                                                   | 2.53                  | 3.34                  | -0.05  | 0.07   |
|                 | 2015 | 1.28                                                   | 1.18                  | 1.33                  | -0.01  | 0.03   | 1.18                                                   | 1.08                  | 1.20                  | 0.00   | 0.02   | 2.77                                                   | 2.33                  | 3.19                  | -0.06  | 0.10   |
|                 | 2016 | 1.27                                                   | 1.22                  | 1.33                  | -0.01  | 0.03   | 1.17                                                   | 1.10                  | 1.21                  | 0.00   | 0.01   | 2.83                                                   | 2.45                  | 3.14                  | -0.05  | 0.07   |
|                 | 2017 | 1.28                                                   | 1.21                  | 1.30                  | -0.02  | 0.06   | 1.17                                                   | 1.12                  | 1.20                  | 0.00   | 0.01   | 2.10                                                   | 1.55                  | 2.61                  | -0.05  | 0.07   |
|                 | 2018 | 1.31                                                   | 1.25                  | 1.33                  | -0.01  | 0.02   | 1.22                                                   | 1.19                  | 1.24                  | 0.00   | 0.01   | 2.73                                                   | 1.91                  | 3.24                  | -0.07  | 0.10   |
|                 | 2019 | 1.31                                                   | 1.25                  | 1.33                  | -0.01  | 0.03   | 1.20                                                   | 1.16                  | 1.24                  | 0.00   | 0.02   | 2.54                                                   | 1.90                  | 3.08                  | -0.08  | 0.14   |
|                 | 2020 | 1.30                                                   | 1.22                  | 1.33                  | -0.02  | 0.08   | 1.17                                                   | 1.11                  | 1.22                  | 0.00   | 0.02   | 2.36                                                   | 1.75                  | 3.00                  | -0.09  | 0.14   |
| NE US (MANE-VU) | 2011 | 0.83                                                   | 0.70                  | 1.01                  | -0.03  | 0.05   | 0.62                                                   | 0.54                  | 0.88                  | -0.03  | 0.05   | 2.56                                                   | 2.51                  | 2.81                  | -0.05  | 0.11   |
|                 | 2012 | 1.12                                                   | 1.01                  | 1.16                  | -0.02  | 0.03   | 0.88                                                   | 0.81                  | 0.91                  | -0.02  | 0.03   | 2.49                                                   | 2.29                  | 2.76                  | -0.03  | 0.04   |
|                 | 2013 | 1.24                                                   | 1.08                  | 1.27                  | -0.02  | 0.03   | 1.03                                                   | 0.93                  | 1.12                  | -0.02  | 0.03   | 2.74                                                   | 2.44                  | 2.93                  | -0.04  | 0.06   |
|                 | 2014 | 1.14                                                   | 1.08                  | 1.20                  | -0.03  | 0.05   | 1.02                                                   | 0.90                  | 1.06                  | -0.03  | 0.04   | 3.00                                                   | 2.72                  | 3.21                  | -0.05  | 0.08   |
|                 | 2015 | 1.07                                                   | 0.97                  | 1.22                  | -0.03  | 0.06   | 0.94                                                   | 0.82                  | 1.05                  | -0.03  | 0.05   | 2.90                                                   | 2.45                  | 3.08                  | -0.06  | 0.10   |
|                 | 2016 | 1.17                                                   | 1.03                  | 1.20                  | -0.04  | 0.05   | 0.94                                                   | 0.87                  | 1.01                  | -0.02  | 0.05   | 2.78                                                   | 2.40                  | 3.00                  | -0.06  | 0.09   |
|                 | 2017 | 1.22                                                   | 1.18                  | 1.25                  | -0.03  | 0.05   | 1.03                                                   | 0.95                  | 1.07                  | -0.01  | 0.02   | 2.60                                                   | 2.16                  | 2.86                  | -0.07  | 0.09   |
|                 | 2018 | 1.18                                                   | 1.08                  | 1.27                  | -0.02  | 0.06   | 1.09                                                   | 1.00                  | 1.16                  | -0.02  | 0.05   | 3.13                                                   | 2.43                  | 3.43                  | -0.10  | 0.15   |
|                 | 2019 | 1.22                                                   | 1.14                  | 1.29                  | -0.04  | 0.08   | 1.05                                                   | 0.99                  | 1.14                  | -0.03  | 0.06   | 2.63                                                   | 2.10                  | 3.05                  | -0.10  | 0.21   |
|                 | 2020 | 1.14                                                   | 1.04                  | 1.20                  | -0.07  | 0.08   | 0.93                                                   | 0.88                  | 1.02                  | -0.04  | 0.08   | 2.63                                                   | 1.88                  | 2.92                  | -0.10  | 0.21   |
| SE US (SESARM)  | 2011 | 1.07                                                   | 0.82                  | 1.18                  | -0.03  | 0.16   | 0.66                                                   | 0.63                  | 0.70                  | -0.03  | 0.12   | 1.35                                                   | 0.78                  | 1.71                  | -0.06  | 0.13   |
|                 | 2012 | 1.23                                                   | 1.12                  | 1.28                  | -0.01  | 0.08   | 0.77                                                   | 0.62                  | 0.85                  | -0.01  | 0.03   | 1.45                                                   | 0.93                  | 1.69                  | -0.03  | 0.12   |
|                 | 2013 | 1.22                                                   | 1.17                  | 1.29                  | -0.01  | 0.03   | 0.87                                                   | 0.79                  | 0.91                  | -0.01  | 0.02   | 1.52                                                   | 0.91                  | 2.04                  | -0.03  | 0.08   |
|                 | 2014 | 1.19                                                   | 1.11                  | 1.28                  | -0.03  | 0.05   | 0.86                                                   | 0.83                  | 0.97                  | -0.01  | 0.03   | 1.41                                                   | 0.87                  | 1.99                  | -0.04  | 0.10   |
|                 | 2015 | 1.17                                                   | 1.11                  | 1.23                  | -0.02  | 0.04   | 0.85                                                   | 0.70                  | 0.94                  | -0.01  | 0.04   | 1.78                                                   | 1.11                  | 2.33                  | -0.04  | 0.07   |
|                 | 2016 | 1.24                                                   | 1.08                  | 1.29                  | -0.03  | 0.08   | 0.78                                                   | 0.68                  | 0.92                  | -0.02  | 0.04   | 1.58                                                   | 1.14                  | 2.05                  | -0.04  | 0.08   |
|                 | 2017 | 1.26                                                   | 1.06                  | 1.31                  | -0.06  | 0.13   | 0.78                                                   | 0.67                  | 0.91                  | -0.01  | 0.02   | 1.30                                                   | 0.69                  | 1.74                  | -0.06  | 0.11   |
|                 | 2018 | 1.20                                                   | 0.98                  | 1.28                  | -0.04  | 0.13   | 0.87                                                   | 0.78                  | 0.96                  | -0.02  | 0.04   | 1.99                                                   | 1.03                  | 2.37                  | -0.07  | 0.12   |
|                 | 2019 | 1.26                                                   | 1.11                  | 1.30                  | -0.06  | 0.14   | 0.72                                                   | 0.68                  | 0.88                  | -0.03  | 0.06   | 1.43                                                   | 0.75                  | 1.86                  | -0.09  | 0.13   |
|                 | 2020 | 1.13                                                   | 0.94                  | 1.22                  | -0.09  | 0.14   | 0.72                                                   | 0.62                  | 0.87                  | -0.03  | 0.07   | 1.64                                                   | 0.85                  | 1.92                  | -0.08  | 0.12   |

## Supplementary References

- 1 McClure, C. D. & Jaffe, D. A. US particulate matter air quality improves except in wildfire-prone areas. *Proceedings of the National Academy of Sciences* **115**, 7901-7906 (2018).
- 2 Foley, K. M. *et al.* 2002–2017 anthropogenic emissions data for air quality modeling over the United States. *Data in Brief* **47**, 109022 (2023). <https://doi.org/10.1016/j.dib.2023.109022>
- 3 Hand, J., Prenni, A., Copeland, S., Schichtel, B. & Malm, W. Thirty years of the Clean Air Act Amendments: Impacts on haze in remote regions of the United States (1990–2018). *Atmospheric Environment* **243**, 117865 (2020).
- 4 Paulot, F., Fan, S. & Horowitz, L. Contrasting seasonal responses of sulfate aerosols to declining SO<sub>2</sub> emissions in the Eastern US: Implications for the efficacy of SO<sub>2</sub> emission controls. *Geophysical Research Letters* **44**, 455-464 (2017).
- 5 Pye, H. O. *et al.* The acidity of atmospheric particles and clouds. *Atmospheric Chemistry and Physics* **20**, 4809-4888 (2020).
- 6 Liu, T., Clegg, S. L. & Abbatt, J. P. Fast oxidation of sulfur dioxide by hydrogen peroxide in deliquesced aerosol particles. *Proceedings of the National Academy of Sciences* **117**, 1354-1359 (2020).
- 7 Jiang, Z. *et al.* Unexpected slowdown of US pollutant emission reduction in the past decade. *Proceedings of the National Academy of Sciences* **115**, 5099-5104 (2018).
- 8 Duncan, B. N. *et al.* A space-based, high-resolution view of notable changes in urban NO<sub>x</sub> pollution around the world (2005–2014). *Journal of Geophysical Research: Atmospheres* **121**, 976-996 (2016).
- 9 Dix, B. *et al.* Nitrogen oxide emissions from US oil and gas production: Recent trends and source attribution. *Geophysical Research Letters* **47**, e2019GL085866 (2020).
- 10 Womack, C. C. *et al.* An Odd Oxygen Framework for Wintertime Ammonium Nitrate Aerosol Pollution in Urban Areas: NO<sub>x</sub> and VOC Control as Mitigation Strategies. *Geophysical Research Letters* **46**, 4971-4979 (2019). <https://doi.org/10.1029/2019GL082028>
- 11 National Atmospheric Deposition Program. (ed National Atmospheric Deposition Program) (2023).
- 12 Schwede, D. B. & Lear, G. G. A novel hybrid approach for estimating total deposition in the United States. *Atmospheric Environment* **92**, 207-220 (2014).
- 13 US EPA. (ed US EPA) (2021).
- 14 Appel, K. W. *et al.* Description and evaluation of the Community Multiscale Air Quality (CMAQ) modeling system version 5.1. *Geoscientific Model Development* **10**, 1703-1732 (2017).
- 15 US EPA. in *Air Pollutant Emissions Trends Data Air Pollutant Emissions Trends Data* (2023).
- 16 Pleim, J. E., Ran, L., Appel, W., Shephard, M. W. & Cady-Pereira, K. New bidirectional ammonia flux model in an air quality model coupled with an agricultural model. *Journal of Advances in Modeling Earth Systems* **11**, 2934-2957 (2019).
- 17 Walker, J. T. *et al.* Aspects of uncertainty in total reactive nitrogen deposition estimates for North American critical load applications. *Science of the Total Environment* **690**, 1005-1018 (2019).
- 18 Sen, P. K. Estimates of the regression coefficient based on Kendall's tau. *Journal of the American Statistical Association* **63**, 1379-1389 (1968).
- 19 Wang, R. *et al.* Monthly patterns of ammonia over the contiguous United States at 2-km resolution. *Geophysical Research Letters* **48**, e2020GL090579 (2021).
- 20 Nenes, A., Pandis, S. N., Weber, R. J. & Russell, A. Aerosol pH and liquid water content determine when particulate matter is sensitive to ammonia and nitrate availability. *Atmospheric Chemistry and Physics* **20**, 3249-3258 (2020).
- 21 Nenes, A. *et al.* Aerosol acidity and liquid water content regulate the dry deposition of inorganic reactive nitrogen. *Atmospheric Chemistry and Physics* **21**, 6023-6033 (2021).
- 22 Helsel, D. R. & Frans, L. M. Regional Kendall test for trend. *Environmental Science & Technology* **40**, 4066-4073 (2006).

- 23 Zhang, L. *et al.* Nitrogen deposition to the United States: distribution, sources, and processes. *Atmospheric Chemistry and Physics* **12**, 4539-4554 (2012).
- 24 Luo, G., Yu, F. & Moch, J. M. Further improvement of wet process treatments in GEOS-Chem v12. 6.0: impact on global distributions of aerosols and aerosol precursors. *Geoscientific Model Development* **13**, 2879-2903 (2020).
- 25 Yahya, K., Wang, K., Gudoshava, M., Glotfelty, T. & Zhang, Y. Application of WRF/Chem over North America under the AQMEII Phase 2: Part I. Comprehensive evaluation of 2006 simulation. *Atmospheric Environment* **115**, 733-755 (2015).
- 26 Tessum, C., Hill, J. & Marshall, J. Twelve-month, 12 km resolution North American WRF-Chem v3. 4 air quality simulation: performance evaluation. *Geoscientific Model Development* **8**, 957-973 (2015).
- 27 Chen, Y., Shen, H. & Russell, A. G. Current and Future Responses of Aerosol pH and Composition in the U.S. to Declining SO<sub>2</sub> Emissions and Increasing NH<sub>3</sub> Emissions. *Environmental Science & Technology* **53**, 9646-9655 (2019).  
<https://doi.org/10.1021/acs.est.9b02005>
- 28 Center for International Earth Science Information Network (CIESIN). in *Revision 11* (ed Columbia University) (NASA Socioeconomic Data and Applications Center (SEDAC), Palisades, New York, 2018).
- 29 Pinder, R. W., Adams, P. J. & Pandis, S. N. (ACS Publications, 2007).
- 30 Tsimpidi, A. P., Karydis, V. A. & Pandis, S. N. Response of fine particulate matter to emission changes of oxides of nitrogen and anthropogenic volatile organic compounds in the Eastern United States. *Journal of the Air & Waste Management Association* **58**, 1463-1473 (2008).
- 31 Schiferl, L. D. *et al.* An investigation of ammonia and inorganic particulate matter in California during the CalNex campaign. *Journal of Geophysical Research: Atmospheres* **119**, 1883-1902 (2014).
- 32 Lee, C. J. *et al.* Response of global particulate-matter-related mortality to changes in local precursor emissions. *Environmental Science & Technology* **49**, 4335-4344 (2015).
- 33 Lelieveld, J., Evans, J. S., Fnais, M., Giannadaki, D. & Pozzer, A. The contribution of outdoor air pollution sources to premature mortality on a global scale. *Nature* **525**, 367-371 (2015).
- 34 Bauer, S. E., Tsigaridis, K. & Miller, R. Significant atmospheric aerosol pollution caused by world food cultivation. *Geophysical Research Letters* **43**, 5394-5400 (2016).
- 35 Guo, H. *et al.* Effectiveness of ammonia reduction on control of fine particle nitrate. *Atmospheric Chemistry and Physics* **18**, 12241-12256 (2018).
- 36 Gu, B. *et al.* Abating ammonia is more cost-effective than nitrogen oxides for mitigating PM<sub>2.5</sub> air pollution. *Science* **374**, 758-762 (2021). <https://doi.org/10.1126/science.abf8623>
- 37 Henze, D. K., Seinfeld, J. H. & Shindell, D. T. Inverse modeling and mapping US air quality influences of inorganic PM 2.5 precursor emissions using the adjoint of GEOS-Chem. *Atmospheric Chemistry and Physics* **9**, 5877-5903 (2009).
- 38 Fann, N., Fulcher, C. M. & Hubbell, B. J. The influence of location, source, and emission type in estimates of the human health benefits of reducing a ton of air pollution. *Air Quality, Atmosphere & Health* **2**, 169-176 (2009).
- 39 Holt, J., Selin, N. E. & Solomon, S. Changes in inorganic fine particulate matter sensitivities to precursors due to large-scale US emissions reductions. *Environmental Science & Technology* **49**, 4834-4841 (2015).
- 40 Heo, J., Adams, P. J. & Gao, H. O. Public health costs of primary PM<sub>2.5</sub> and inorganic PM<sub>2.5</sub> precursor emissions in the United States. *Environmental Science & Technology* **50**, 6061-6070 (2016).
- 41 Dedoussi, I. C., Eastham, S. D., Monier, E. & Barrett, S. R. H. Premature mortality related to United States cross-state air pollution. *Nature* **578**, 261-265 (2020).  
<https://doi.org/10.1038/s41586-020-1983-8>

- 42 Stanier, C. *et al.* Overview of the LADCO winter nitrate study: hourly ammonia, nitric acid and  
PM 2.5 composition at an urban and rural site pair during PM<sub>2.5</sub> episodes in the US Great Lakes  
region. *Atmospheric Chemistry and Physics* **12**, 11037-11056 (2012).
- 43 Brewer, P. & Moore, T. Source contributions to visibility impairment in the southeastern and  
western United States. *Journal of the Air & Waste Management Association* **59**, 1070-1081  
(2009).
- 44 Chen, J. *et al.* Seasonal Modeling of PM<sub>2.5</sub> in California's San Joaquin Valley. *Atmospheric  
Environment* **92**, 182-190 (2014).
- 45 Cheng, B. & Wang-Li, L. Responses of Secondary Inorganic PM<sub>2.5</sub> to Precursor Gases in an  
Ammonia Abundant Area In North Carolina. *Aerosol and Air Quality Research* **19**, 1126-1138  
(2019). <https://doi.org/10.4209/aaqr.2018.10.0384>
