# Supplementary material for: Regime shift in secondary inorganic aerosol formation and nitrogen deposition in the rural United States
Source: PubMed Central journal article supplement (PMC11245397; doi:10.1038/s41561-024-01455-9), 2024-06-20
Supplement: 41561_2024_1455_MOESM2_ESM.pdf [file 41561_2024_1455_MOESM2_ESM.pdf]

## Reporting Summary

Nature Portfolio wishes to improve the reproducibility of the work that we publish. This form provides structure for consistency and transparency in reporting. For further information on Nature Portfolio policies, see our [Editorial Policies](#) and the [Editorial Policy Checklist](#).

### Statistics

For all statistical analyses, confirm that the following items are present in the figure legend, table legend, main text, or Methods section.

- |                                     |                                                                                                                                                                                                                                                                                                |
|-------------------------------------|------------------------------------------------------------------------------------------------------------------------------------------------------------------------------------------------------------------------------------------------------------------------------------------------|
| n/a                                 | Confirmed                                                                                                                                                                                                                                                                                      |
| <input type="checkbox"/>            | <input checked="" type="checkbox"/> The exact sample size ( $n$ ) for each experimental group/condition, given as a discrete number and unit of measurement                                                                                                                                    |
| <input type="checkbox"/>            | <input checked="" type="checkbox"/> A statement on whether measurements were taken from distinct samples or whether the same sample was measured repeatedly                                                                                                                                    |
| <input type="checkbox"/>            | <input checked="" type="checkbox"/> The statistical test(s) used AND whether they are one- or two-sided<br><i>Only common tests should be described solely by name; describe more complex techniques in the Methods section.</i>                                                               |
| <input type="checkbox"/>            | <input checked="" type="checkbox"/> A description of all covariates tested                                                                                                                                                                                                                     |
| <input checked="" type="checkbox"/> | <input type="checkbox"/> A description of any assumptions or corrections, such as tests of normality and adjustment for multiple comparisons                                                                                                                                                   |
| <input type="checkbox"/>            | <input checked="" type="checkbox"/> A full description of the statistical parameters including central tendency (e.g. means) or other basic estimates (e.g. regression coefficient) AND variation (e.g. standard deviation) or associated estimates of uncertainty (e.g. confidence intervals) |
| <input type="checkbox"/>            | <input checked="" type="checkbox"/> For null hypothesis testing, the test statistic (e.g. $F$ , $t$ , $r$ ) with confidence intervals, effect sizes, degrees of freedom and $P$ value noted<br><i>Give <math>P</math> values as exact values whenever suitable.</i>                            |
| <input checked="" type="checkbox"/> | <input type="checkbox"/> For Bayesian analysis, information on the choice of priors and Markov chain Monte Carlo settings                                                                                                                                                                      |
| <input checked="" type="checkbox"/> | <input type="checkbox"/> For hierarchical and complex designs, identification of the appropriate level for tests and full reporting of outcomes                                                                                                                                                |
| <input type="checkbox"/>            | <input checked="" type="checkbox"/> Estimates of effect sizes (e.g. Cohen's $d$ , Pearson's $r$ ), indicating how they were calculated                                                                                                                                                         |

*Our web collection on [statistics for biologists](#) contains articles on many of the points above.*

### Software and code

Policy information about [availability of computer code](#)

- |                 |                                                                                                                                                                                                                                                                                                                                             |
|-----------------|---------------------------------------------------------------------------------------------------------------------------------------------------------------------------------------------------------------------------------------------------------------------------------------------------------------------------------------------|
| Data collection | <input type="text" value="We did not use specific software to collect data in this study."/>                                                                                                                                                                                                                                                |
| Data analysis   | <input type="text" value="ISORROPIA II (v2.3) developed by Georgia Institute of Technology was used for Scripts and packages in Python 3 (v3.9.13) were used for data analysis. Packages used in this study include Numpy (v1.21.5), Scipy (v1.9.1), Pandas (v1.4.4), matplotlib (v3.5.2), pymannkendall (v1.4.2), and Cartopy (0.22.0)."/> |

For manuscripts utilizing custom algorithms or software that are central to the research but not yet described in published literature, software must be made available to editors and reviewers. We strongly encourage code deposition in a community repository (e.g. GitHub). See the Nature Portfolio [guidelines for submitting code & software](#) for further information.

### Data

Policy information about [availability of data](#)

All manuscripts must include a [data availability statement](#). This statement should provide the following information, where applicable:

- Accession codes, unique identifiers, or web links for publicly available datasets
- A description of any restrictions on data availability
- For clinical datasets or third party data, please ensure that the statement adheres to our [policy](#)

The integrated observation data that support the findings of this study and the source data for figures presented in the main text, Extended Data, and Supplementary Information are available in Dryad with the identifier doi:10.5061/dryad.zpc866tg3.

## Research involving human participants, their data, or biological material

Policy information about studies with [human participants or human data](#). See also policy information about [sex, gender \(identity/presentation\), and sexual orientation](#) and [race, ethnicity and racism](#).

|                                                                    |                 |
|--------------------------------------------------------------------|-----------------|
| Reporting on sex and gender                                        | Not applicable. |
| Reporting on race, ethnicity, or other socially relevant groupings | Not applicable. |
| Population characteristics                                         | Not applicable. |
| Recruitment                                                        | Not applicable. |
| Ethics oversight                                                   | Not applicable. |

Note that full information on the approval of the study protocol must also be provided in the manuscript.

## Field-specific reporting

Please select the one below that is the best fit for your research. If you are not sure, read the appropriate sections before making your selection.

Life sciences     Behavioural & social sciences     Ecological, evolutionary & environmental sciences

For a reference copy of the document with all sections, see [nature.com/documents/nr-reporting-summary-flat.pdf](https://nature.com/documents/nr-reporting-summary-flat.pdf)

## Ecological, evolutionary & environmental sciences study design

All studies must disclose on these points even when the disclosure is negative.

|                          |                                                                                                                                                                                                                                                                                                                                                                                                                                                                                                                                                                                                                                                                                                                                                                                                                                                                                                                                                                                                                                                                                                                                     |
|--------------------------|-------------------------------------------------------------------------------------------------------------------------------------------------------------------------------------------------------------------------------------------------------------------------------------------------------------------------------------------------------------------------------------------------------------------------------------------------------------------------------------------------------------------------------------------------------------------------------------------------------------------------------------------------------------------------------------------------------------------------------------------------------------------------------------------------------------------------------------------------------------------------------------------------------------------------------------------------------------------------------------------------------------------------------------------------------------------------------------------------------------------------------------|
| Study description        | In this study, we integrated observations of concentrations of gaseous precursors, aerosol composition, and meteorological conditions from multiple monitoring networks. The integrated observations were then used for trend analyses (Mann-Kendall regional trend tests) and as inputs for aerosol thermodynamic modeling (ISORROPIA II). 1000 Monte Carlo runs were conducted to estimate uncertainties of the simulations.                                                                                                                                                                                                                                                                                                                                                                                                                                                                                                                                                                                                                                                                                                      |
| Research sample          | We used existing data from routine monitoring networks in the US, including CASTNET ( <a href="https://www.epa.gov/castnet/download-data">https://www.epa.gov/castnet/download-data</a> ), IMPROVE ( <a href="http://views.cira.colostate.edu/fed/DataWizard/Default.aspx">http://views.cira.colostate.edu/fed/DataWizard/Default.aspx</a> ), EPA CSN ( <a href="http://views.cira.colostate.edu/fed/DataWizard/Default.aspx">http://views.cira.colostate.edu/fed/DataWizard/Default.aspx</a> ), AMoN ( <a href="https://nadp.slh.wisc.edu/networks/ammonia-monitoring-network/">https://nadp.slh.wisc.edu/networks/ammonia-monitoring-network/</a> ), and NOAA ISD ( <a href="https://www.ncei.noaa.gov/products/land-based-station/integrated-surface-database">https://www.ncei.noaa.gov/products/land-based-station/integrated-surface-database</a> ) as well as reanalysis meteorological data from North America Regional Reanalysis ( <a href="http://nomads.ncdc.noaa.gov/#narr_datasets">http://nomads.ncdc.noaa.gov/#narr_datasets</a> ). The observation data were quality controlled and assured by original providers. |
| Sampling strategy        | Sites included in this study at least had observations for atmospheric concentrations of ammonia, nitric acid, particulate ammonium, particulate nitrate, particulate sulfate, sodium, potassium, magnesium, calcium, and chloride as well as temperature and relative humidity. These are the inputs required for aerosol thermodynamic analysis. The integrated dataset is the largest of its kind to our knowledge. It covers 68 sites in the rural US. These sites are representative of regional atmospheric conditions. We focused on the rural US because there was no urban site met the requirement at the time of analysis. This is reflected in the title and discussed in the manuscript.<br>For the Monte Carlo uncertainty analysis, simulation results converge (relative standard deviation of sample mean and variance < 5%) for all sites after 700 runs. Therefore, the sample size we chose (n=1000) is sufficient.                                                                                                                                                                                             |
| Data collection          | Data were collected by Da Pan directly from sources listed above.                                                                                                                                                                                                                                                                                                                                                                                                                                                                                                                                                                                                                                                                                                                                                                                                                                                                                                                                                                                                                                                                   |
| Timing and spatial scale | Site selection started with AMoN sites that have monitoring sites from other networks within 50 km. The spatial window was determined by comparing observations for same variable from sites within 10 km, 25 km, 50 km, and 100 km. Since agreement of meteorological observations (T and RH) deteriorated significantly with a spatial window of 100 km, we used a 50 km spatial to achieve the largest spatial coverage while maintaining minimizing uncertainties caused by site separation. Our analysis started from 2011 since AMoN monitoring program officially started in that year. More sites with sufficient inputs for aerosol thermodynamic analysis became available in 2015. We conducted trend tests for periods of 2011 - 2015, 2016 - 2020, and 2011 - 2020 using all sites and sites established in 2011. We did not find significant differences. Thus, 2011 - 2020 results using all sites are presented in the main text and presented results of these tests in the SI.                                                                                                                                    |
| Data exclusions          | We excluded sites with only data records shorter than two years. Because annual and seasonal averages were discussed extensively in this study, we also excluded data from a site in a year if it missed or had invalid data for more than 30% of the time during any season in that year.                                                                                                                                                                                                                                                                                                                                                                                                                                                                                                                                                                                                                                                                                                                                                                                                                                          |
| Reproducibility          | We conducted reproducibility test by replacing observations of aerosol composition from CASTNET with IMPROVE and EPN CSN. The reproducibility test passed since the results were comparable.                                                                                                                                                                                                                                                                                                                                                                                                                                                                                                                                                                                                                                                                                                                                                                                                                                                                                                                                        |

Randomization

We grouped our observations into five regions based on the boundaries of Regional Planning Organizations. Randomization is irrelevant to this grouping because its purpose is to illustrate regional differences.

Blinding

Blinding was irrelevant to this study because the unique properties of each sample (i.e., observations from certain site at a given time) is critical to our analysis.

Did the study involve field work?  Yes  No

## Reporting for specific materials, systems and methods

We require information from authors about some types of materials, experimental systems and methods used in many studies. Here, indicate whether each material, system or method listed is relevant to your study. If you are not sure if a list item applies to your research, read the appropriate section before selecting a response.

### Materials & experimental systems

### Methods

- | n/a                                 | Involvement in the study                               |
|-------------------------------------|--------------------------------------------------------|
| <input checked="" type="checkbox"/> | <input type="checkbox"/> Antibodies                    |
| <input checked="" type="checkbox"/> | <input type="checkbox"/> Eukaryotic cell lines         |
| <input checked="" type="checkbox"/> | <input type="checkbox"/> Palaeontology and archaeology |
| <input checked="" type="checkbox"/> | <input type="checkbox"/> Animals and other organisms   |
| <input checked="" type="checkbox"/> | <input type="checkbox"/> Clinical data                 |
| <input checked="" type="checkbox"/> | <input type="checkbox"/> Dual use research of concern  |
| <input checked="" type="checkbox"/> | <input type="checkbox"/> Plants                        |

- | n/a                                 | Involvement in the study                        |
|-------------------------------------|-------------------------------------------------|
| <input checked="" type="checkbox"/> | <input type="checkbox"/> ChIP-seq               |
| <input checked="" type="checkbox"/> | <input type="checkbox"/> Flow cytometry         |
| <input checked="" type="checkbox"/> | <input type="checkbox"/> MRI-based neuroimaging |
